# Supplementary material for: Palladium-catalyzed regioselective allylation of five-membered heteroarenes with allyltributylstannane
Source: Royal Society of Chemistry journal article supplement (doi:10.1039/c4cc10373d), 2015-01-01

## Supporting Information

### Palladium-catalyzed Regioselective Allylation of Five-membered Heteroarenes with Allyltributylstannane

Sheng Zhang,<sup>a</sup> Xiaoqiang Yu,<sup>\*a</sup> Xiujuan Feng,<sup>a</sup> Yoshinori Yamamoto,<sup>a,b</sup> Ming Bao<sup>\*a</sup>

<sup>a</sup> State Key Laboratory of Fine Chemicals, Dalian University of Technology, Dalian 116023, China. Fax: +86-0411-84986181; Tel: +86-0411-84986180; E-mail: mingbao@dlut.edu.cn

<sup>b</sup> WPI-AIMR (WPI-Advanced Institute for Materials Research), Tohoku University, Sendai 980-8577, Japan

#### Table of Contents

|                                                                                                     |      |
|-----------------------------------------------------------------------------------------------------|------|
| 1. General Information .....                                                                        | S-2  |
| 2. Preparation and Characterization of Starting Materials.....                                      | S-2  |
| 3. Experimental Procedures and Characterization Data for All Compounds.....                         | S-9  |
| 4. References.....                                                                                  | S-18 |
| 5. Copies of <sup>1</sup> H and <sup>13</sup> C NMR Spectra of Starting Materials and Products..... | S-20 |

## 1. General Information

All reactions were carried out under a nitrogen atmosphere unless otherwise noted. Solvents were purified by standard techniques without special instructions.  $^1\text{H}$  and  $^{13}\text{C}$  NMR spectra were recorded on either a Varian Inova-400 spectrometer (400 MHz for  $^1\text{H}$ , 100 MHz for  $^{13}\text{C}$ ) or a Bruker Avance II-400 spectrometer (400 MHz for  $^1\text{H}$ , 100 MHz for  $^{13}\text{C}$ );  $\text{CDCl}_3$  and TMS were used as a solvent and an internal standard, respectively. The chemical shifts are reported in ppm downfield ( $\delta$ ) from TMS, the coupling constants  $J$  are given in Hz. The peak patterns are indicated as follows: s, singlet; d, doublet; t, triplet; m, multiplet; q, quartet. IR spectra were recorded on a NEXUS FT-IR spectrometer. High resolution mass spectra were recorded on either a Q-TOF mass spectrometry or a GC-TOF mass spectrometry. TLC was carried out on  $\text{SiO}_2$  (silica gel 60 F<sub>254</sub>, Merck), and the spots were located with UV light, iodoplatinate reagent or 1% aqueous  $\text{KMnO}_4$ . Flash chromatography was carried out on  $\text{SiO}_2$  (silica gel 60, 200-300 mesh) or basic  $\text{Al}_2\text{O}_3$  ( $\text{Al}_2\text{O}_3$  90, 100-200 mesh). The starting materials **3a** and **3b** are commercially available.

## 2. Preparation and Characterization of Starting Materials

### (1) Representative procedure for preparation of starting materials 1a-1d and 1l-1n:

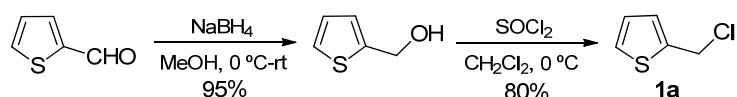

To a solution of thiophene-2-carbaldehyde (1.12 g, 10 mmol) in  $\text{MeOH}$  (50 mL) at  $0\text{ }^\circ\text{C}$ ,  $\text{NaBH}_4$  (0.19 g, 5 mmol) was added slowly. After the resulting mixture was stirred overnight at room temperature, water (10 mL) was added slowly to quench the reaction. The product was extracted with ethyl ether (50 mL  $\times$  2), and the combined organic layers were washed with brine ((50 mL  $\times$  2), dried over  $\text{Na}_2\text{SO}_4$ . The solvent was removed under reduced pressure, and the residue obtained was purified via silica gel chromatography (eluent: petroleum ether/ethyl acetate = 5:1) to afford thiophen-2-ylmethanol as a colorless oil (1.08 g, 95% yield).

To a solution of thiophen-2-ylmethanol (0.60 g, 5 mmol) in  $\text{CH}_2\text{Cl}_2$  (20 mL) at  $0\text{ }^\circ\text{C}$ , thionyl chloride ( $\text{SOCl}_2$ , 0.73 mL, 10 mmol) was slowly added. The resulting mixture was stirred overnight at room temperature, and then the solvent and excess of  $\text{SOCl}_2$  were removed under reduced pressure. The residue obtained was dissolved in  $\text{CH}_2\text{Cl}_2$

(20 mL), washed with saturated sodium bicarbonate solution, and dried over Na<sub>2</sub>SO<sub>4</sub>. The solvent was removed under reduced pressure to give 2-(chloromethyl)thiophene (**1a**)<sup>1</sup> as a brown oil (0.53 g, 80% yield), which was used without further purification in the allylation reaction. <sup>1</sup>H NMR (400 MHz, CDCl<sub>3</sub>) δ 4.76 (s, 2H), 6.91 (dd, *J* = 4.0, 9.1 Hz, 1H), 7.04 (d, *J* = 3.2 Hz, 1H), 7.26 (d, *J* = 4.8 Hz, 1H).

**3-Bromo-2-(chloromethyl)thiophene (1b):**<sup>2</sup>

Brown oil (1.63 g, 77% yield). <sup>1</sup>H NMR (400 MHz, CDCl<sub>3</sub>) δ 4.77 (s, 2H), 6.96 (d, *J* = 5.2 Hz, 1H), 7.32 (d, *J* = 5.6 Hz, 1H).

**3-Chloro-2-(chloromethyl)thiophene (1c):**

Brown oil (1.34 g, 80% yield). <sup>1</sup>H NMR (400 MHz, CDCl<sub>3</sub>) δ 4.74 (s, 2H), 6.87 (d, *J* = 5.2 Hz, 1H), 7.26 (d, *J* = 5.6 Hz, 1H); <sup>13</sup>C NMR (100 MHz, CDCl<sub>3</sub>) δ 37.7, 125.6, 125.9, 127.9, 132.5; IR (neat) 3112, 2959, 1527, 1428, 1355, 1264, 945, 855, 725, 620 cm<sup>-1</sup>; HRMS (EI) calcd for C<sub>5</sub>H<sub>4</sub>Cl<sub>2</sub>S: 165.9411 [M]<sup>+</sup>; found: 165.9418.

**4-Bromo-2-(chloromethyl)thiophene (1d):**<sup>3</sup>

Brown oil (1.62 g, 77% yield). <sup>1</sup>H NMR (400 MHz, CDCl<sub>3</sub>) δ 4.73 (s, 2H), 7.00 (s, 1H), 7.20 (d, *J* = 1.2 Hz, 1H), 7.04 (d, *J* = 3.2 Hz, 1H), 7.26 (d, *J* = 4.8 Hz, 1H).

**1-(5-(chloromethyl)thiophen-2-yl)ethanone (1l):**

Colorless oil (0.59 g, 85% yield), mp 24–25 °C. <sup>1</sup>H NMR (400 MHz, CDCl<sub>3</sub>) δ 2.55 (s, 3H), 4.76 (s, 2H), 7.10 (d, *J* = 4.0 Hz, 1H), 7.55 (d, *J* = 3.6 Hz, 1H); <sup>13</sup>C NMR (100 MHz, CDCl<sub>3</sub>) δ 26.6, 39.9, 128.2, 132.2, 145.0, 148.6, 190.5; IR (KBr) 3094, 2961, 1661, 1457, 1275, 811 cm<sup>-1</sup>; HRMS (EI) calcd for C<sub>7</sub>H<sub>7</sub>ClOS: 173.9906 [M]<sup>+</sup>; found: 173.9906.

**methyl 5-(chloromethyl)thiophene-2-carboxylate (1m):**

Yellow oil (0.91 g, 95% yield). <sup>1</sup>H NMR (400 MHz, CDCl<sub>3</sub>) δ 3.78 (s, 3H), 4.66 (s, 2H), 6.96 (d, *J* = 3.2 Hz, 1H), 7.53 (d, *J* = 3.2 Hz, 1H); <sup>13</sup>C NMR (100 MHz, CDCl<sub>3</sub>) δ 40.0, 52.4, 128.1, 133.4, 134.3, 147.3, 162.4; IR (neat) 2952, 1712, 1463, 1263, 1097, 749 cm<sup>-1</sup>; HRMS (EI) calcd for C<sub>7</sub>H<sub>7</sub>ClO<sub>2</sub>S: 189.9855 [M]<sup>+</sup>; found: 189.9864.

**2-Bromo-5-(chloromethyl)thiophene (1n):**

Brown oil (0.74 g, 70% yield). <sup>1</sup>H NMR (400 MHz, CDCl<sub>3</sub>) δ 4.71 (s, 2H), 6.84 (d, *J* = 3.6 Hz, 1H), 6.90 (d, *J* = 4.0 Hz, 1H); <sup>13</sup>C NMR (100 MHz, CDCl<sub>3</sub>) δ 40.2, 113.6, 128.0, 129.6, 141.6; IR (neat) 3098, 2955, 1433, 1260, 970, 797, 696, 486 cm<sup>-1</sup>; HRMS (EI) calcd for C<sub>5</sub>H<sub>4</sub>BrClS: 209.8906 [M]<sup>+</sup>; found: 209.8906.

**2-Chloro-5-(chloromethyl)thiophene (1n'):**

Brown oil (0.63 g, 75% yield). <sup>1</sup>H NMR (400 MHz, CDCl<sub>3</sub>) δ 4.69 (s, 2H), 6.76 (d, *J* = 3.6 Hz, 1H), 6.85 (d, *J* = 3.6 Hz, 1H); <sup>13</sup>C NMR (100 MHz, CDCl<sub>3</sub>) δ 40.5, 126.0,

127.1, 131.4, 138.9; IR (neat) 3102, 2957, 1448, 1260, 1064, 998, 797, 698, 494  $\text{cm}^{-1}$ ; HRMS (EI) calcd for  $\text{C}_5\text{H}_4\text{Cl}_2\text{S}$ : 165.9411  $[\text{M}]^+$ ; found: 165.9420.

**(2) Representative procedure for preparation of starting materials 1e-1f and 5a-5h:**

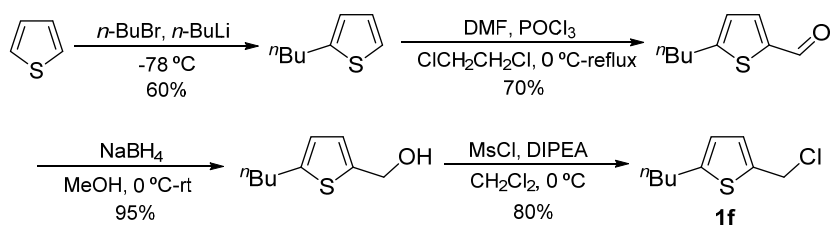

5-Butylthiophene-2-carbaldehyde was synthesized via butylation and formylation of thiophene according to the reported procedures<sup>4,5</sup>. (5-Butylthiophen-2-yl)methanol was prepared through the reduction reaction of 5-butylthiophene-2-carbaldehyde (7 mmol) with  $\text{NaBH}_4$  (colorless oil, 1.13 g, 95% yield).

(5-Butylthiophen-2-yl)methanol (0.17 g, 1 mmol) and *N,N*-diisopropylethylamine (DIPEA, 0.25 mL, 1.5 mmol) were dissolved in 4 mL of dry  $\text{CH}_2\text{Cl}_2$ , and then, mesyl chloride (0.12 mL, 1.5 mmol) was added dropwise to the mixture at 0 °C. After the resulting mixture was stirred at 0 °C for 20 min, the mixture was allowed to warm slowly to room temperature over 1 h. The mixture obtained was diluted with  $\text{CH}_2\text{Cl}_2$  (5 mL) and washed with cold water (10 mL), cold aqueous hydrochloric acid (10 wt%, 10 mL), and saturated sodium bicarbonate solution (20 mL) sequentially. The organic phase was dried over  $\text{Na}_2\text{SO}_4$  and evaporated to give 2-butyl-5-(chloromethyl)thiophene (**1f**) as a colorless oil (0.15 g, 80% yield), which was used without further purification in the allylation reaction.  $^1\text{H}$  NMR (400 MHz,  $\text{CDCl}_3$ )  $\delta$  0.92 (t,  $J = 7.4$  Hz, 3H), 1.35–1.40 (m, 2H), 1.59–1.67 (m, 2H), 2.76 (t,  $J = 7.6$  Hz, 2H), 4.71 (s, 2H), 6.58 (d,  $J = 3.6$  Hz, 1H), 6.84 (d,  $J = 3.2$  Hz, 1H);  $^{13}\text{C}$  NMR (100 MHz,  $\text{CDCl}_3$ )  $\delta$  13.9, 22.3, 30.0, 33.7, 41.1, 123.8, 127.6, 137.4, 148.0; IR (neat) 2957, 2929, 2857, 1465, 1259, 801, 694  $\text{cm}^{-1}$ ; HRMS (EI) calcd for  $\text{C}_9\text{H}_{13}\text{ClS}$ : 188.0427  $[\text{M}]^+$ ; found: 188.0434.

**2-(Chloromethyl)-5-methylthiophene (1e)<sup>6</sup>:**

Colorless oil (0.12 g, 80% yield).  $^1\text{H}$  NMR (400 MHz,  $\text{CDCl}_3$ )  $\delta$  2.46 (s, 3H), 4.74 (s, 2H), 6.59 (d,  $J = 2.4$  Hz, 1H), 6.86 (d,  $J = 3.2$  Hz, 1H).

**2-(chloromethyl)-5-phenylthiophene (1g):**

Yellow solid (0.17 g, 80% yield), mp 43–44 °C.  $^1\text{H}$  NMR (400 MHz,  $\text{CDCl}_3$ )  $\delta$  4.59 (s, 2H), 6.83 (d,  $J = 3.2$  Hz, 1H), 6.94 (d,  $J = 3.2$  Hz, 1H), 7.12 (dd,  $J = 7.2, 7.2$  Hz, 1H), 7.19 (dd,  $J = 7.2, 7.6$  Hz, 2H), 7.40 (d,  $J = 8.4$  Hz, 2H);  $^{13}\text{C}$  NMR (100 MHz,  $\text{CDCl}_3$ )

$\delta$  40.8, 122.8, 125.8, 127.9, 128.8, 129.0, 133.9, 139.3, 145.9; IR (KBr) 3062, 2963, 1461, 1259, 906, 810, 757, 688  $\text{cm}^{-1}$ ; HRMS (EI) calcd for  $\text{C}_{11}\text{H}_9\text{ClS}$ : 208.0113  $[\text{M}]^+$ ; found: 208.0122.

**2-(chloromethyl)-5-(phenylethynyl)thiophene (1h):**

Yellow solid (0.16 g, 70% yield), mp 21–22 °C.  $^1\text{H}$  NMR (400 MHz,  $\text{CDCl}_3$ )  $\delta$  4.68 (s, 2H), 6.90 (d,  $J = 3.6$  Hz, 1H), 7.07 (d,  $J = 3.6$  Hz, 1H), 7.30 (dd,  $J = 2.8, 3.2$  Hz, 3H), 7.46–7.49 (m, 2H);  $^{13}\text{C}$  NMR (100 MHz,  $\text{CDCl}_3$ )  $\delta$  40.3, 82.5, 94.1, 122.7, 124.9, 127.8, 128.6, 128.8, 131.6, 131.9, 141.7; IR (KBr) 3057, 2958, 2205, 1597, 1493, 1258, 1189, 806, 755, 689  $\text{cm}^{-1}$ ; HRMS (EI) calcd for  $\text{C}_{13}\text{H}_9\text{ClS}$ : 232.0113  $[\text{M}]^+$ ; found: 232.0117.

**2-(chloromethyl)-5-styrylthiophene (1i):**

Green solid (0.15 g, 65% yield), mp 47–48 °C.  $^1\text{H}$  NMR (400 MHz,  $\text{CDCl}_3$ )  $\delta$  4.56 (s, 2H), 6.69 (d,  $J = 3.6$  Hz, 1H), 6.72 (d,  $J = 16.0$  Hz, 1H), 6.76 (d,  $J = 3.6$  Hz, 1H), 6.97 (d,  $J = 16.4$  Hz, 1H), 7.09 (dd,  $J = 6.8, 7.6$  Hz, 1H), 7.17 (dd,  $J = 7.6, 7.6$  Hz, 2H), 7.26 (d,  $J = 7.6$  Hz, 2H);  $^{13}\text{C}$  NMR (100 MHz,  $\text{CDCl}_3$ )  $\delta$  41.2, 121.8, 126.1, 126.7, 128.1, 128.7, 129.0, 129.3, 136.9, 139.0, 144.8; IR (KBr) 3081, 3056, 3020, 1445, 1258, 1191, 1042, 952, 805, 691  $\text{cm}^{-1}$ ; HRMS (EI) calcd for  $\text{C}_{13}\text{H}_{11}\text{ClS}$ : 234.0270  $[\text{M}]^+$ ; found: 234.0281.

**2-(5-(chloromethyl)thiophen-2-yl)-1,3-dioxolane (1j):**

Yellow oil (0.14 g, 70% yield).  $^1\text{H}$  NMR (400 MHz,  $\text{CDCl}_3$ )  $\delta$  3.99–4.02 (m, 2H), 4.10–4.13 (m, 2H), 4.75 (s, 2H), 6.05 (s, 1H), 6.96 (d,  $J = 3.6$  Hz, 1H), 7.00 (d,  $J = 3.6$  Hz, 1H);  $^{13}\text{C}$  NMR (100 MHz,  $\text{CDCl}_3$ )  $\delta$  40.6, 65.4, 100.2, 126.1, 127.4, 141.3, 143.5; IR (neat) 2959, 2889, 1387, 1212, 1080, 941, 811, 700  $\text{cm}^{-1}$ ; HRMS (ESI) calcd for  $\text{C}_8\text{H}_{10}\text{ClO}_2\text{S}$ : 205.0090  $[\text{M}+\text{H}]^+$ ; found: 205.0089.

**2-(5-(Chloromethyl)thiophen-2-yl)-2-methyl-1,3-dioxolane (1k):**

Yellow oil (0.14 g, 65% yield).  $^1\text{H}$  NMR (400 MHz,  $\text{CDCl}_3$ )  $\delta$  1.75 (s, 3H), 3.93–4.05 (m, 4H), 4.73 (s, 2H), 6.87 (d,  $J = 3.6$  Hz, 1H), 6.91 (d,  $J = 3.6$  Hz, 1H);  $^{13}\text{C}$  NMR (100 MHz,  $\text{CDCl}_3$ )  $\delta$  27.5, 40.6, 65.0, 107.0, 123.9, 127.5, 139.6, 149.1; IR (neat) 2989, 2890, 1375, 1196, 1037, 871, 811  $\text{cm}^{-1}$ ; HRMS (ESI) calcd for  $\text{C}_9\text{H}_{12}\text{ClO}_2\text{S}$ : 219.0247  $[\text{M}+\text{H}]^+$ ; found: 219.0243.

**2-(chloromethyl)-1-tosyl-1H-pyrrole (5a)<sup>7</sup>:**

Pink solid (0.22 g, 83% yield).  $^1\text{H}$  NMR (400 MHz,  $\text{CDCl}_3$ )  $\delta$  2.40 (s, 3H), 4.83 (s, 2H), 6.24 (s, 1H), 6.36 (s, 1H), 7.28–7.30 (m, 3H), 7.77 (d,  $J = 8.0$  Hz, 2H).

**4-bromo-2-(chloromethyl)-1-tosyl-1H-pyrrole (5b):**

Brown solid (0.26 g, 75% yield), mp 59–60 °C,  $^1\text{H}$  NMR (400 MHz,  $\text{CDCl}_3$ )  $\delta$  2.43 (s,

3H), 4.77 (s, 2H), 6.36 (s, 1H), 7.32–7.34 (m, 3H), 7.80 (d,  $J = 8.4$  Hz, 2H);  $^{13}\text{C}$  NMR (100 MHz,  $\text{CDCl}_3$ )  $\delta$  21.9, 36.7, 100.6, 119.06, 119.12, 123.1, 127.7, 130.3, 131.2, 135.3, 146.0; IR (KBr) 3145, 2924, 2854, 1596, 1373, 1175, 916, 666, 584, 541  $\text{cm}^{-1}$ ; HRMS (EI) calcd for  $\text{C}_{12}\text{H}_{11}\text{BrClNO}_2\text{S}$ : 346.9382  $[\text{M}]^+$ ; found: 346.9385.

**2-(Chloromethyl)-4-(thiophen-2-ylethynyl)-1-tosyl-1H-pyrrole (5c):**

Yellow oil (0.28 g, 75% yield).  $^1\text{H}$  NMR (400 MHz,  $\text{CDCl}_3$ )  $\delta$  2.42 (s, 3H), 4.79 (s, 2H), 6.46 (s, 1H), 6.98 (dd,  $J = 3.6, 8.4$  Hz, 1H), 7.22 (d,  $J = 3.2$  Hz, 1H), 7.26 (d,  $J = 5.2$  Hz, 1H), 7.32 (d,  $J = 8.0$  Hz, 2H), 7.53 (s, 1H), 7.81 (d,  $J = 8.4$  Hz, 2H);  $^{13}\text{C}$  NMR (100 MHz,  $\text{CDCl}_3$ )  $\delta$  21.8, 36.9, 83.7, 85.6, 108.1, 118.9, 123.1, 127.1, 127.2, 127.5, 127.6, 130.3, 130.8, 132.0, 135.3, 145.9; IR (neat) 3137, 2924, 2212, 1375, 1176, 1090, 701, 665, 584  $\text{cm}^{-1}$ ; HRMS (ESI) calcd for  $\text{C}_{18}\text{H}_{15}\text{ClNO}_2\text{S}_2$ : 376.0233  $[\text{M}+\text{H}]^+$ ; found: 376.0227.

**2-(Chloromethyl)-4-(phenylethynyl)-1-tosyl-1H-pyrrole (5d):**

Yellow oil (0.30 g, 80% yield).  $^1\text{H}$  NMR (400 MHz,  $\text{CDCl}_3$ )  $\delta$  2.41 (s, 3H), 4.80 (s, 2H), 6.48 (s, 1H), 7.31–7.33 (m, 5H), 7.45–7.48 (m, 2H), 7.53–7.54 (m, 1H), 7.81 (d,  $J = 8.4$  Hz, 2H);  $^{13}\text{C}$  NMR (100 MHz,  $\text{CDCl}_3$ )  $\delta$  21.9, 37.0, 81.9, 90.6, 108.4, 119.16, 119.21, 123.1, 127.0, 127.6, 128.5, 130.3, 130.7, 131.6, 135.4, 145.9; IR (neat) 3138, 2923, 2220, 1596, 1375, 1175, 1091, 667, 588  $\text{cm}^{-1}$ ; HRMS (EI) calcd for  $\text{C}_{20}\text{H}_{16}\text{ClNO}_2\text{S}$ : 369.0590  $[\text{M}]^+$ ; found: 369.0595.

**2-(Chloromethyl)-4-(p-tolyethynyl)-1-tosyl-1H-pyrrole (5e):**

Yellow oil (0.31 g, 80% yield).  $^1\text{H}$  NMR (400 MHz,  $\text{CDCl}_3$ )  $\delta$  2.35 (s, 3H), 2.41 (s, 3H), 4.79 (s, 2H), 6.46 (s, 1H), 7.13 (d,  $J = 8.0$  Hz, 2H), 7.31 (d,  $J = 8.4$  Hz, 2H), 7.35 (d,  $J = 8.0$  Hz, 2H), 7.52 (s, 1H), 7.81 (d,  $J = 8.0$  Hz, 2H);  $^{13}\text{C}$  NMR (100 MHz,  $\text{CDCl}_3$ )  $\delta$  21.7, 21.8, 37.0, 81.2, 90.7, 108.6, 119.2, 120.0, 126.9, 127.6, 129.3, 130.2, 130.7, 131.5, 135.4, 138.6, 145.8, ; IR (neat) 3138, 2922, 2218, 1596, 1375, 1175, 1091, 815, 667, 587  $\text{cm}^{-1}$ ; HRMS (EI) calcd for  $\text{C}_{21}\text{H}_{18}\text{ClNO}_2\text{S}$ : 383.0747  $[\text{M}]^+$ ; found: 383.0751.

**2-(Chloromethyl)-4-(4-methylstyryl)-1-tosyl-1H-pyrrole (5f):**

Yellow solid (0.27 g, 70% yield), mp 63–64 °C.  $^1\text{H}$  NMR (400 MHz,  $\text{CDCl}_3$ )  $\delta$  2.35 (s, 3H), 2.42 (s, 3H), 4.71 (s, 2H), 6.16 (s, 1H), 6.23 (d,  $J = 12.0$  Hz, 1H), 6.49 (d,  $J = 12.0$  Hz, 1H), 7.09 (d,  $J = 7.6$  Hz, 2H), 7.17 (d,  $J = 8.0$  Hz, 2H), 7.19 (s, 1H), 7.30 (d,  $J = 8.0$  Hz, 2H), 7.75 (d,  $J = 8.4$  Hz, 2H);  $^{13}\text{C}$  NMR (100 MHz,  $\text{CDCl}_3$ )  $\delta$  21.5, 21.8, 37.4, 117.4, 120.8, 123.7, 127.5, 128.6, 129.1, 130.1, 130.2, 130.4, 134.7, 135.8, 137.2, 145.4; IR (KBr) 3017, 2922, 1370, 1173, 1092, 812, 667, 589  $\text{cm}^{-1}$ ; HRMS (EI) calcd for  $\text{C}_{21}\text{H}_{20}\text{ClNO}_2\text{S}$ : 385.0903  $[\text{M}]^+$ ; found: 385.0909.

***tert*-butyl 2-(chloromethyl)-1*H*-pyrrole-1-carboxylate (5g):**

Brown oil (0.13 g, 60% yield). <sup>1</sup>H NMR (400 MHz, CDCl<sub>3</sub>) δ 1.63 (s, 9H), 4.87 (s, 2H), 6.12 (dd, *J* = 3.2, 3.2 Hz, 2H), 6.31 (s, 1H), 7.31 (s, 1H); <sup>13</sup>C NMR (100 MHz, CDCl<sub>3</sub>) δ 28.0, 39.7, 84.7, 110.3, 116.0, 123.6, 130.2, 148.9; IR (neat) 2979, 2934, 1744, 1318, 1126, 848, 734 cm<sup>-1</sup>; HRMS (EI) calcd for C<sub>10</sub>H<sub>14</sub>ClNO<sub>2</sub>: 215.0713 [M]<sup>+</sup>; found: 215.0723.

***tert*-Butyl 2-(chloromethyl)-5-(phenylethynyl)-1*H*-pyrrole-1-carboxylate (5h):**

Brown oil (0.22 g, 70% yield). <sup>1</sup>H NMR (400 MHz, CDCl<sub>3</sub>) δ 1.64 (s, 9H), 4.86 (s, 2H), 6.29 (d, *J* = 3.6 Hz, 1H), 6.51 (d, *J* = 3.6 Hz, 1H), 7.33–7.34 (m, 3H), 7.49–7.51 (m, 2H); <sup>13</sup>C NMR (100 MHz, CDCl<sub>3</sub>) δ 28.0, 39.8, 81.9, 85.4, 93.3, 114.9, 118.2, 119.0, 123.3, 128.45, 128.51, 131.5, 132.1, 148.5; IR (neat) 2981, 2933, 2210, 1749, 1311, 1117, 794, 691 cm<sup>-1</sup>; HRMS (EI) calcd for C<sub>18</sub>H<sub>18</sub>ClNO<sub>2</sub>: 315.1026 [M]<sup>+</sup>; found: 315.1031.

**(3) Representative procedure for preparation of starting materials 3c-3h:**

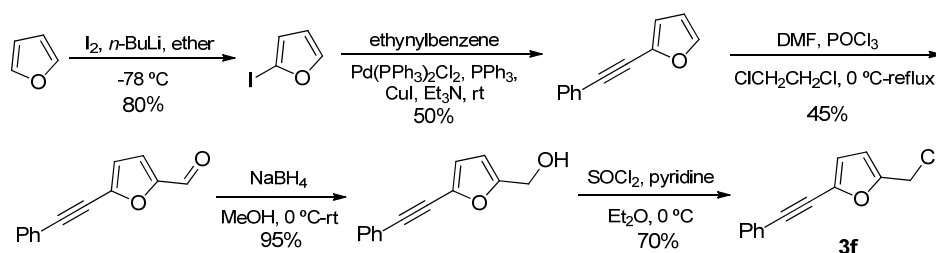

2-(Phenylethynyl)furan was synthesized via iodination of furan (2.04 g, 30 mmol) followed by Sonogashira reaction according to the reported procedures.<sup>8</sup> (5-(Phenylethynyl)furan-2-yl)methanol was prepared via the formylation (45% yield) of 2-(phenylethynyl)furan followed by reduction reaction with NaBH<sub>4</sub> (95% yield).

To a solution of (5-(phenylethynyl)furan-2-yl)methanol (2 mmol, 0.40 g) and pyridine (2 mmol, 0.161 mL) in 2 mL of anhydrous ethyl ether, a solution of thionyl chloride (2 mmol, 0.145 mL) in 0.5 mL of ethyl ether was added dropwise with stirring at 0 °C. After the reaction mixture was kept at room temperature for 2 h, the solid was filtered off. The filtrate was washed with saturated aqueous NaHCO<sub>3</sub> and dried over Na<sub>2</sub>SO<sub>4</sub>. The solvent was removed under reduced pressure to give 2-(chloromethyl)-5-(phenylethynyl)furan (**3f**) as a yellow solid (0.30 g, 70% yield), mp 32–33 °C, which was used without further purification in the allylation reaction. <sup>1</sup>H NMR (400 MHz, CDCl<sub>3</sub>) δ 4.60 (s, 2H), 6.42 (d, *J* = 3.6 Hz, 1H), 6.63 (d, *J* = 3.6 Hz, 1H), 7.37–7.39 (m, 3H), 7.55–7.57 (m, 2H); <sup>13</sup>C NMR (100 MHz, CDCl<sub>3</sub>) δ 37.3, 79.2, 94.0, 111.2, 116.4, 122.0, 128.5, 129.0, 131.5, 137.9, 151.0; IR (KBr) 3126,

3060, 2963, 2214, 1601, 1533, 1484, 1266, 1019, 972, 796, 756, 690  $\text{cm}^{-1}$ ; HRMS (EI) calcd for  $\text{C}_{13}\text{H}_9\text{ClO}$ : 216.0342  $[\text{M}]^+$ ; found: 216.0351.

**(5-(Chloromethyl)furan-2-yl)methyl acetate (3c):**

Colorless oil (0.30 g, 80% yield).  $^1\text{H}$  NMR (400 MHz,  $\text{CDCl}_3$ )  $\delta$  2.09 (s, 3H), 4.58 (s, 2H), 5.04 (s, 2H), 6.34 (d,  $J = 3.2$  Hz, 1H), 6.36 (d,  $J = 3.2$  Hz, 1H);  $^{13}\text{C}$  NMR (100 MHz,  $\text{CDCl}_3$ )  $\delta$  21.0, 37.5, 58.1, 110.8, 111.9, 150.6, 150.9, 170.7; IR (neat) 3131, 2962, 1743, 1376, 1235, 1021, 802  $\text{cm}^{-1}$ ; HRMS (EI) calcd for  $\text{C}_8\text{H}_9\text{ClO}_3$ : 188.0240  $[\text{M}]^+$ ; found: 188.0248.

**(5-(Chloromethyl)furan-2-yl)methyl butyrate (3d):**

Colorless oil (0.33 g, 76% yield).  $^1\text{H}$  NMR (400 MHz,  $\text{CDCl}_3$ )  $\delta$  0.94 (t,  $J = 7.4$  Hz, 3H), 1.62–1.71 (m, 2H), 2.32 (t,  $J = 7.4$  Hz, 2H), 4.57 (s, 2H), 5.05 (s, 2H), 6.34 (d,  $J = 3.6$  Hz, 1H), 6.36 (d,  $J = 3.2$  Hz, 1H);  $^{13}\text{C}$  NMR (100 MHz,  $\text{CDCl}_3$ )  $\delta$  13.7, 18.5, 36.1, 37.5, 57.9, 110.8, 111.7, 150.76, 150.84, 173.3; IR (neat) 2966, 2877, 1739, 1170, 984, 800, 711  $\text{cm}^{-1}$ ; HRMS (EI) calcd for  $\text{C}_{10}\text{H}_{13}\text{ClO}_3$ : 216.0553  $[\text{M}]^+$ ; found: 216.0555.

**(5-(Chloromethyl)furan-2-yl)methyl benzoate (3e):**

Yellow solid (0.35 g, 70% yield), mp 22–23  $^\circ\text{C}$ .  $^1\text{H}$  NMR (400 MHz,  $\text{CDCl}_3$ )  $\delta$  4.59 (s, 2H), 5.29 (s, 2H), 6.37 (d,  $J = 3.2$  Hz, 1H), 6.45 (d,  $J = 2.8$  Hz, 1H), 7.43 (dd,  $J = 7.6$ , 8.0 Hz, 2H), 7.56 (dd,  $J = 7.2$ , 7.6 Hz, 1H), 8.05 (d,  $J = 7.6$  Hz, 2H);  $^{13}\text{C}$  NMR (100 MHz,  $\text{CDCl}_3$ )  $\delta$  37.5, 58.6, 110.8, 112.0, 128.5, 129.9, 133.3, 150.6, 150.9, 166.3; IR (KBr) 3063, 2961, 1721, 1451, 1267, 1096, 1025, 800, 711  $\text{cm}^{-1}$ ; HRMS (EI) calcd for  $\text{C}_{13}\text{H}_{11}\text{ClO}_3$ : 250.0397  $[\text{M}]^+$ ; found: 250.0406.

**2-(Chloromethyl)-5-(p-tolyethynyl)furan (3g):**

Yellow solid (0.32 g, 70% yield), mp 69–70  $^\circ\text{C}$ .  $^1\text{H}$  NMR (400 MHz,  $\text{CDCl}_3$ )  $\delta$  2.36 (s, 3H), 4.57 (s, 2H), 6.38 (d,  $J = 3.2$  Hz, 1H), 6.56 (d,  $J = 3.6$  Hz, 1H), 7.15 (d,  $J = 8.0$  Hz, 2H), 7.41 (d,  $J = 8.0$  Hz, 2H);  $^{13}\text{C}$  NMR (100 MHz,  $\text{CDCl}_3$ )  $\delta$  21.7, 37.4, 78.6, 94.2, 111.2, 116.1, 119.0, 129.4, 131.6, 138.2, 139.4, 150.9; IR (KBr) 3125, 2918, 2211, 1534, 1265, 1020, 971, 818, 690  $\text{cm}^{-1}$ ; HRMS (EI) calcd for  $\text{C}_{14}\text{H}_{11}\text{ClO}$ : 230.0498  $[\text{M}]^+$ ; found: 230.0505.

**2-(Chloromethyl)-5-((4-methoxyphenyl)ethynyl)furan (3h):**

Yellow solid (0.37 g, 74% yield), mp 49–50  $^\circ\text{C}$ .  $^1\text{H}$  NMR (400 MHz,  $\text{CDCl}_3$ )  $\delta$  3.82 (s, 3H), 4.57 (s, 2H), 6.39 (d,  $J = 3.2$  Hz, 1H), 6.55 (d,  $J = 3.2$  Hz, 1H), 6.87 (d,  $J = 8.8$  Hz, 2H), 7.46 (d,  $J = 9.2$  Hz, 2H);  $^{13}\text{C}$  NMR (100 MHz,  $\text{CDCl}_3$ )  $\delta$  37.4, 55.5, 78.0, 94.1, 111.2, 114.1, 114.3, 115.8, 133.3, 138.3, 150.8, 160.3; IR (KBr) 3124, 2961, 2834, 2210, 1608, 1257, 1020, 970, 804, 712  $\text{cm}^{-1}$ ; HRMS (EI) calcd for  $\text{C}_{14}\text{H}_{11}\text{ClO}_2$ :



246.0448 [M]<sup>+</sup>; found: 246.0456.

### 3. Experimental Procedures and Characterization Data for All Compounds

#### Method A:

**Representative Procedure for Obtaining Products 2e–2n, 4a–4h, and 6h:** Allyltributylstannane (165.6 mg, 0.5 mmol) and **1e** (73.3 mg, 0.5 mmol) were added to a solution of Pd<sub>2</sub>(dba)<sub>3</sub> (22.9 mg, 0.025 mmol) and PPh<sub>3</sub> (26.2 mg, 0.1 mmol) in acetone (3 mL) or CH<sub>2</sub>Cl<sub>2</sub> (3 mL) at room temperature. The reaction mixture was stirred under N<sub>2</sub> atmosphere at room temperature. The reaction progress was monitored by TLC. After the starting material **1e** was consumed (10 h), the solvent was removed under reduced pressure. The residue obtained was purified by column chromatography on basic alumina (eluent: petroleum ether) to afford 2-allyl-2-methyl-5-methylene-2,5-dihydrothiophene (**2e**) in 50% yield (38.1 mg) as a colorless oil.

#### 2-Allyl-2-methyl-5-methylene-2,5-dihydrothiophene (**2e**)

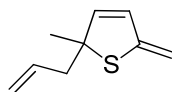

Colorless oil (38.1 mg, 50% yield). <sup>1</sup>H NMR (400 MHz, CDCl<sub>3</sub>) δ 1.53 (s, 3H), 2.48 (d, *J* = 7.2 Hz, 2H), 4.92 (s, 1H), 5.01 (s, 1H), 5.07–5.12 (m, 2H), 5.76–5.87 (m, 1H), 5.91 (d, *J* = 6.0 Hz, 1H), 6.13 (d, *J* = 6.0 Hz, 1H); <sup>13</sup>C NMR (100 MHz, CDCl<sub>3</sub>) δ 28.8, 47.4, 65.8, 100.9, 118.4, 130.4, 134.2, 143.9, 151.2; IR (neat) 2921, 2854, 1686, 1639, 1448, 1373, 995, 917, 772 cm<sup>-1</sup>; HRMS (EI) calcd for C<sub>9</sub>H<sub>12</sub>S: 152.0660 [M]<sup>+</sup>; found: 152.0662.

#### 2-Allyl-2-butyl-5-methylene-2,5-dihydrothiophene (**2f**)

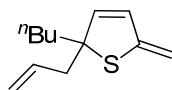

Colorless oil (49.6 mg, 51% yield). <sup>1</sup>H NMR (400 MHz, CDCl<sub>3</sub>) δ 0.89 (t, *J* = 7.2 Hz, 3H), 1.25–1.30 (m, 2H), 1.45–1.49 (m, 2H), 1.64–1.75 (m, 2H), 2.51 (dd, *J* = 6.8, 6.8 Hz, 2H), 4.93 (s, 1H), 5.00 (s, 1H), 5.07–5.11 (m, 2H), 5.76–5.82 (m, 1H), 5.85 (d, *J* = 7.6 Hz, 1H), 6.15 (d, *J* = 6.4 Hz, 1H); <sup>13</sup>C NMR (100 MHz, CDCl<sub>3</sub>) δ 14.0, 23.0, 27.4, 40.3, 45.8, 70.3, 100.6, 118.0, 131.1, 134.1, 142.5, 151.3; IR (neat) 2957, 2930,

2859, 1584, 1436, 1378, 995, 916, 828  $\text{cm}^{-1}$ ; HRMS (EI) calcd for  $\text{C}_{12}\text{H}_{18}\text{S}$ : 194.1129  $[\text{M}]^+$ ; found: 194.1134.

### 2-Allyl-5-methylene-2-phenyl-2,5-dihydrothiophene (2g)

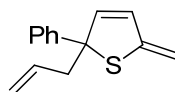

Colorless oil (83.6 mg, 78% yield).  $^1\text{H}$  NMR (400 MHz,  $\text{CDCl}_3$ )  $\delta$  2.96 (d,  $J = 7.2$  Hz, 2H), 4.96 (s, 1H), 5.05–5.11 (m, 3H), 5.65–5.74 (m, 1H), 6.21 (d,  $J = 6.0$  Hz, 1H), 6.30 (d,  $J = 6.0$  Hz, 1H), 7.19–7.23 (m, 1H), 7.29–7.32 (m, 2H), 7.36–7.38 (m, 2H);  $^{13}\text{C}$  NMR (100 MHz,  $\text{CDCl}_3$ )  $\delta$  46.8, 71.1, 101.8, 118.6, 126.5, 127.2, 128.7, 131.6, 133.9, 141.4, 144.4, 150.8; IR (neat) 3059, 2924, 1584, 1446, 1210, 918, 834, 759, 696  $\text{cm}^{-1}$ ; HRMS (EI) calcd for  $\text{C}_{14}\text{H}_{14}\text{S}$ : 214.0816  $[\text{M}]^+$ ; found: 214.0823.

### 2-Allyl-5-methylene-2-(phenylethynyl)-2,5-dihydrothiophene (2h)

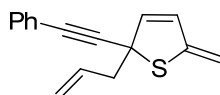

Colorless oil (95.3 mg, 80% yield).  $^1\text{H}$  NMR (400 MHz,  $\text{CDCl}_3$ )  $\delta$  2.70–2.83 (m, 2H), 4.98 (s, 1H), 5.11 (s, 1H), 5.19 (s, 1H), 5.23 (d,  $J = 4.8$  Hz, 1H), 5.95–6.12 (m, 1H), 6.05 (d,  $J = 6.4$  Hz, 1H), 6.24 (d,  $J = 6.0$  Hz, 1H), 7.27–7.28 (m, 3H), 7.39–7.41 (m, 2H);  $^{13}\text{C}$  NMR (100 MHz,  $\text{CDCl}_3$ )  $\delta$  48.0, 60.8, 86.0, 88.8, 102.3, 119.2, 122.8, 128.2, 128.4, 131.5, 131.7, 133.1, 139.1, 149.7; IR (neat) 3078, 2925, 2853, 1585, 1489, 1208, 920, 840, 756, 691  $\text{cm}^{-1}$ ; HRMS (EI) calcd for  $\text{C}_{16}\text{H}_{14}\text{S}$ : 238.0816  $[\text{M}]^+$ ; found: 238.0811.

### 2-Allyl-5-methylene-2-styryl-2,5-dihydrothiophene (2i)

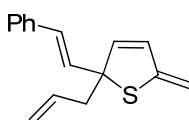

Colorless oil (90.1 mg, 75% yield).  $^1\text{H}$  NMR (400 MHz,  $\text{CDCl}_3$ )  $\delta$  2.73 (dd,  $J = 1.2, 7.2$  Hz, 2H), 4.98 (s, 1H), 5.08 (s, 1H), 5.13 (s, 1H), 5.15–5.17 (m, 1H), 5.80–5.90 (m, 1H), 6.00 (d,  $J = 6.0$  Hz, 1H), 6.26 (d,  $J = 6.4$  Hz, 1H), 6.37 (d,  $J = 16.0$  Hz, 1H), 6.48 (d,  $J = 16.0$  Hz, 1H), 7.19–7.23 (m, 1H), 7.27–7.31 (m, 2H), 7.34–7.36 (m, 2H);  $^{13}\text{C}$  NMR (100 MHz,  $\text{CDCl}_3$ )  $\delta$  45.4, 69.5, 101.8, 118.7, 126.5, 127.7, 128.6, 128.9, 131.7, 132.6, 133.6, 136.8, 140.5, 150.4; IR (neat) 3079, 3026, 2924, 2853, 1583, 1448, 1207, 964, 919, 834, 792, 748, 693  $\text{cm}^{-1}$ ; HRMS (EI) calcd for  $\text{C}_{16}\text{H}_{16}\text{S}$ : 240.0973  $[\text{M}]^+$ ; found: 240.0962.

### 2-(2-Allyl-5-methylene-2,5-dihydrothiophen-2-yl)-1,3-dioxolane (2j)

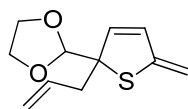

Colorless oil (78.9 mg, 75% yield).  $^1\text{H}$  NMR (400 MHz,  $\text{CDCl}_3$ )  $\delta$  2.60–2.62 (m, 2H), 3.90–3.93 (m, 2H), 4.02–4.04 (m, 2H), 4.97 (s, 1H), 5.01 (s, 1H), 5.05 (s, 1H), 5.07–5.14 (m, 2H), 5.78–5.88 (m, 1H), 5.93 (dd,  $J = 1.2, 6.0$  Hz, 1H), 6.29 (d,  $J = 6.0$  Hz, 1H);  $^{13}\text{C}$  NMR (100 MHz,  $\text{CDCl}_3$ )  $\delta$  38.6, 65.90, 65.92, 72.6, 102.0, 106.8, 118.1, 133.4, 133.9, 137.6, 150.5; IR (neat) 3076, 2978, 2886, 1613, 1585, 1162, 917, 836, 792  $\text{cm}^{-1}$ ; HRMS (ESI) calcd for  $\text{C}_{11}\text{H}_{14}\text{NaO}_2\text{S}$ : 233.0612  $[\text{M}+\text{Na}]^+$ ; found: 233.0606.

**2-(2-Allyl-5-methylene-2,5-dihydrothiophen-2-yl)-2-methyl-1,3-dioxolane (2k)**

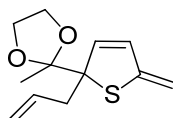

Colorless oil (79.6 mg, 71% yield).  $^1\text{H}$  NMR (400 MHz,  $\text{CDCl}_3$ )  $\delta$  1.42 (s, 3H), 2.58–2.71 (m, 2H), 3.98–4.02 (m, 4H), 4.96 (s, 1H), 5.03–5.09 (m, 3H), 5.75–5.85 (m, 1H), 5.90 (d,  $J = 6.0$  Hz, 1H), 6.25 (d,  $J = 6.4$  Hz, 1H);  $^{13}\text{C}$  NMR (100 MHz,  $\text{CDCl}_3$ )  $\delta$  21.5, 38.8, 65.6, 65.8, 101.4, 112.5, 117.4, 133.5, 134.2, 138.9, 151.2; IR (neat) 3075, 2983, 1886, 1584, 1372, 1203, 1037, 949, 831, 566  $\text{cm}^{-1}$ ; HRMS (ESI) calcd for  $\text{C}_{12}\text{H}_{16}\text{NaO}_2\text{S}$ : 247.0769  $[\text{M}+\text{Na}]^+$ ; found: 247.0759.

**1-(2-Allyl-5-methylene-2,5-dihydrothiophen-2-yl)ethanone (2l)**

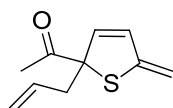

Colorless oil (57.7 mg, 64% yield).  $^1\text{H}$  NMR (400 MHz,  $\text{CDCl}_3$ )  $\delta$  2.24 (s, 3H), 2.74 (d,  $J = 7.2$  Hz, 2H), 5.04 (s, 1H), 5.10 (s, 1H), 5.12–5.14 (m, 1H), 5.16 (s, 1H), 5.69–5.78 (m, 1H), 6.01 (dd,  $J = 0.8, 6.0$  Hz, 1H), 6.41 (d,  $J = 6.0$  Hz, 1H);  $^{13}\text{C}$  NMR (100 MHz,  $\text{CDCl}_3$ )  $\delta$  26.3, 40.7, 76.2, 103.2, 119.2, 133.0, 135.4, 137.6, 149.9, 203.7; IR (neat) 3077, 2979, 2916, 1709, 1354, 1191, 921, 787  $\text{cm}^{-1}$ ; HRMS (EI) calcd for  $\text{C}_{10}\text{H}_{12}\text{OS}$ : 180.0609  $[\text{M}]^+$ ; found: 180.0617.

**Methyl 2-allyl-5-methylene-2,5-dihydrothiophene-2-carboxylate (2m)**

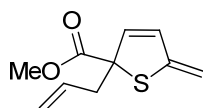

Colorless oil (69.7 mg, 71% yield).  $^1\text{H}$  NMR (400 MHz,  $\text{CDCl}_3$ )  $\delta$  2.71–2.85 (m, 2H), 3.75 (s, 3H), 4.99 (s, 1H), 5.11–5.16 (m, 3H), 5.68–5.79 (m, 1H), 6.13 (dd,  $J = 0.8, 6.0$  Hz, 1H), 6.30 (d,  $J = 6.0$  Hz, 1H);  $^{13}\text{C}$  NMR (100 MHz,  $\text{CDCl}_3$ )  $\delta$  44.0, 52.9, 70.3, 102.7, 119.5, 132.2, 133.1, 136.6, 149.2, 171.9  $\text{cm}^{-1}$ ; IR (neat) 3079, 2952, 1732, 1435, 1211, 925, 844, 798  $\text{cm}^{-1}$ ; HRMS (EI) calcd for  $\text{C}_{10}\text{H}_{12}\text{O}_2\text{S}$ : 196.0558  $[\text{M}]^+$ ; found:

196.0559.

**2,2-Diallyl-5-methylene-2,5-dihydrothiophene (2n)**

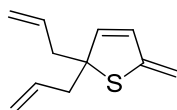

Colorless oil (66.0 mg, 74% yield).  $^1\text{H}$  NMR (400 MHz,  $\text{CDCl}_3$ )  $\delta$  2.52 (dd,  $J = 7.2$ , 7.2 Hz, 4H), 4.93 (s, 1H), 5.01 (s, 1H), 5.09 (d,  $J = 6.8$  Hz, 2H), 5.13 (s, 2H), 5.76–5.87 (m, 2H), 5.89 (d,  $J = 6.0$  Hz, 1H), 6.18 (d,  $J = 6.0$  Hz, 1H);  $^{13}\text{C}$  NMR (100 MHz,  $\text{CDCl}_3$ )  $\delta$  45.3, 69.4, 101.2, 118.6, 131.6, 134.0, 142.1, 151.1; IR (neat) 3077, 2924, 2854, 1584, 1434, 995, 917, 831, 788  $\text{cm}^{-1}$ ; HRMS (EI) calcd for  $\text{C}_{11}\text{H}_{14}\text{S}$ : 178.0816  $[\text{M}]^+$ ; found: 178.0810.

**Methyl 2-allyl-5-methylene-2,5-dihydrofuran-2-carboxylate (4a)**

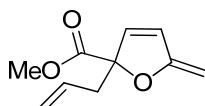

Colorless oil (42.3 mg, 47% yield).  $^1\text{H}$  NMR (400 MHz,  $\text{CDCl}_3$ )  $\delta$  2.56–2.74 (m, 2H), 3.73 (s, 3H), 4.03 (d,  $J = 2.0$  Hz, 1H), 4.41 (d,  $J = 1.2$  Hz, 1H), 5.09 (s, 1H), 5.12 (d,  $J = 8.0$  Hz, 1H), 5.66–5.76 (m, 1H), 6.19 (s, 2H);  $^{13}\text{C}$  NMR (100 MHz,  $\text{CDCl}_3$ )  $\delta$  41.4, 52.6, 82.4, 94.1, 119.6, 127.2, 130.8, 134.4, 163.7, 170.4; IR (neat) 3082, 2955, 2924, 1736, 1436, 1228, 1029, 923, 799  $\text{cm}^{-1}$ ; HRMS (EI) calcd for  $\text{C}_{10}\text{H}_{12}\text{O}_3$ : 180.0786  $[\text{M}]^+$ ; found: 180.0791.

**Ethyl 2-allyl-5-methylene-2,5-dihydrofuran-2-carboxylate (4b)**

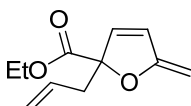

Colorless oil (51.5 mg, 53% yield).  $^1\text{H}$  NMR (400 MHz,  $\text{CDCl}_3$ )  $\delta$  1.29 (t,  $J = 7.2$  Hz, 3H), 2.59–2.79 (m, 2H), 4.05 (d,  $J = 2.0$  Hz, 1H), 4.22 (q,  $J = 7.1$  Hz, 2H), 4.44 (s, 1H), 5.12 (s, 1H), 5.16 (d,  $J = 9.2$  Hz, 1H), 5.70–5.80 (m, 1H), 6.22 (s, 2H);  $^{13}\text{C}$  NMR (100 MHz,  $\text{CDCl}_3$ )  $\delta$  14.3, 41.5, 61.8, 82.4, 94.1, 119.6, 127.2, 131.0, 134.6, 163.8, 170.0; IR (neat) 3081, 2982, 2936, 1752, 1732, 1227, 1031, 921, 793  $\text{cm}^{-1}$ ; HRMS (EI) calcd for  $\text{C}_{11}\text{H}_{14}\text{O}_3$ : 194.0943  $[\text{M}]^+$ ; found: 194.0949.

**(2-Allyl-5-methylene-2,5-dihydrofuran-2-yl)methyl acetate (4c)**

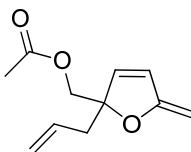

Colorless oil (55.4 mg, 57% yield).  $^1\text{H}$  NMR (400 MHz,  $\text{CDCl}_3$ )  $\delta$  2.06 (s, 3H), 2.49 (dd,  $J = 5.2$ , 6.0 Hz, 2H), 3.95 (s, 1H), 4.17 (dd,  $J = 11.6$ , 30.4 Hz, 2H), 4.30 (s, 1H),

5.12 (d,  $J = 12.8$  Hz, 2H), 5.67–5.78 (m, 1H), 6.08 (d,  $J = 5.6$  Hz, 1H), 6.20 (d,  $J = 5.6$  Hz, 1H);  $^{13}\text{C}$  NMR (100 MHz,  $\text{CDCl}_3$ )  $\delta$  21.0, 40.1, 66.7, 80.9, 92.9, 119.3, 127.7, 131.7, 135.6, 164.3, 170.9; IR (neat) 3079, 2980, 2937, 1745, 1381, 1231, 1044, 921, 790  $\text{cm}^{-1}$ ; HRMS (EI) calcd for  $\text{C}_{11}\text{H}_{14}\text{O}_3$ : 194.0943  $[\text{M}]^+$ ; found: 194.0944.

**(2-Allyl-5-methylene-2,5-dihydrofuran-2-yl)methyl butyrate (4d)**

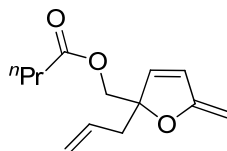

Colorless oil (50.0 mg, 45% yield).  $^1\text{H}$  NMR (400 MHz,  $\text{CDCl}_3$ )  $\delta$  0.94 (t,  $J = 7.4$  Hz, 3H), 1.59–1.68 (m, 2H), 2.30 (t,  $J = 7.4$  Hz, 2H), 2.47–2.50 (m, 2H), 3.94 (s, 1H), 4.18 (dd,  $J = 11.6, 38.8$  Hz, 2H), 4.28 (s, 1H), 5.10–5.14 (m, 2H), 5.68–5.78 (m, 1H), 6.08 (d,  $J = 5.6$  Hz, 1H), 6.18 (d,  $J = 6.0$  Hz, 1H);  $^{13}\text{C}$  NMR (100 MHz,  $\text{CDCl}_3$ )  $\delta$  13.7, 18.4, 36.1, 40.0, 66.2, 80.7, 92.9, 119.1, 127.5, 131.6, 135.5, 164.2, 173.3; IR (neat) 3080, 2966, 2877, 1740, 1657, 1179, 981, 922, 789  $\text{cm}^{-1}$ ; HRMS (EI) calcd for  $\text{C}_{13}\text{H}_{18}\text{O}_3$ : 222.1256  $[\text{M}]^+$ ; found: 222.1257.

**(2-Allyl-5-methylene-2,5-dihydrofuran-2-yl)methyl benzoate (4e)**

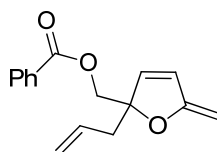

Colorless oil (32.0 mg, 25% yield).  $^1\text{H}$  NMR (400 MHz,  $\text{CDCl}_3$ )  $\delta$  2.58 (d,  $J = 7.2$ , 2H), 3.98 (s, 1H), 4.32 (s, 1H), 4.41 (dd,  $J = 11.6, 60.0$  Hz, 2H), 5.13 (s, 1H), 5.17 (d,  $J = 7.2$  Hz, 1H), 5.73–5.84 (m, 1H), 6.16 (d,  $J = 5.6$  Hz, 1H), 6.22 (d,  $J = 5.6$  Hz, 1H), 7.44 (dd,  $J = 7.6, 7.6$  Hz, 2H), 7.56 (dd,  $J = 7.2, 7.6$  Hz, 1H), 8.02 (d,  $J = 7.6$  Hz, 2H);  $^{13}\text{C}$  NMR (100 MHz,  $\text{CDCl}_3$ )  $\delta$  40.3, 67.1, 81.0, 93.0, 119.4, 127.8, 128.5, 129.9, 130.0, 131.7, 133.3, 135.6, 164.4, 166.3; IR (neat) 3076, 2980, 2949, 1723, 1272, 1112, 922, 712  $\text{cm}^{-1}$ ; HRMS (EI) calcd for  $\text{C}_{16}\text{H}_{16}\text{O}_3$ : 256.1099  $[\text{M}]^+$ ; found: 256.1105.

**2-Allyl-5-methylene-2-(phenylethynyl)-2,5-dihydrofuran (4f)**

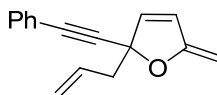

Colorless oil (61.1 mg, 55% yield).  $^1\text{H}$  NMR (400 MHz,  $\text{CDCl}_3$ )  $\delta$  2.71 (dd,  $J = 5.6, 6.4$  Hz, 2H), 4.04 (s, 1H), 4.37 (s, 1H), 5.18 (s, 1H), 5.20–5.22 (m, 1H), 5.86–5.97 (m, 1H), 6.19 (d,  $J = 5.6$  Hz, 1H), 6.22–6.24 (m, 1H), 7.28–7.30 (m, 3H), 7.42–7.44 (m, 2H);  $^{13}\text{C}$  NMR (100 MHz,  $\text{CDCl}_3$ )  $\delta$  45.5, 81.8, 86.1, 87.2, 87.3, 119.5, 122.3, 125.9, 128.4, 128.8, 131.8, 131.9, 136.7, 163.5; IR (neat) 3080, 2981, 2911, 2229, 1657,

1490, 1294, 1009, 919, 793, 757, 691  $\text{cm}^{-1}$ ; HRMS (EI) calcd for  $\text{C}_{16}\text{H}_{14}\text{O}$ : 222.1045  $[\text{M}]^+$ ; found: 222.1053.

**2-Allyl-5-methylene-2-(p-tolyethynyl)-2,5-dihydrofuran (4g)**

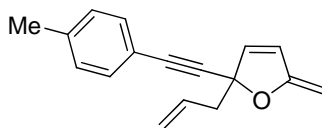

Colorless oil (59.1 mg, 50% yield).  $^1\text{H}$  NMR (400 MHz,  $\text{CDCl}_3$ )  $\delta$  2.33 (s, 3H), 2.71 (dd,  $J = 5.6, 6.8$  Hz, 2H), 4.02 (s, 1H), 4.35 (s, 1H), 5.17 (s, 1H), 5.20 (d,  $J = 4.4$  Hz, 1H), 5.86–5.96 (m, 1H), 6.18 (d,  $J = 6.0$  Hz, 1H), 6.23 (d,  $J = 5.2$  Hz, 1H), 7.09 (d,  $J = 7.6$  Hz, 2H), 7.32 (d,  $J = 8.0$  Hz, 2H);  $^{13}\text{C}$  NMR (100 MHz,  $\text{CDCl}_3$ )  $\delta$  21.7, 45.5, 81.7, 85.5, 87.3, 87.5, 119.4, 125.9, 129.1, 131.9, 132.0, 136.9, 139.0, 163.5; IR (neat) 3081, 2922, 2229, 1774, 1510, 1293, 923, 817  $\text{cm}^{-1}$ ; HRMS (EI) calcd for  $\text{C}_{17}\text{H}_{16}\text{O}$ : 236.1201  $[\text{M}]^+$ ; found: 236.1196.

**2-Allyl-2-((4-methoxyphenyl)ethynyl)-5-methylene-2,5-dihydrofuran (4h)**

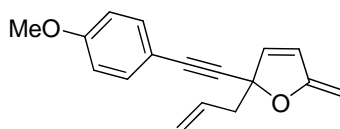

Colorless oil (69.4 mg, 55% yield).  $^1\text{H}$  NMR (400 MHz,  $\text{CDCl}_3$ )  $\delta$  2.71 (dd,  $J = 5.6, 6.8$  Hz, 2H), 3.79 (s, 3H), 4.02 (s, 1H), 4.35 (s, 1H), 5.17–5.21 (m, 2H), 5.86–5.96 (m, 1H), 6.18 (d,  $J = 5.6$  Hz, 1H), 6.22–6.24 (m, 1H), 6.81 (d,  $J = 8.4$  Hz, 2H), 7.36 (d,  $J = 8.4$  Hz, 2H);  $^{13}\text{C}$  NMR (100 MHz,  $\text{CDCl}_3$ )  $\delta$  45.5, 55.4, 81.7, 84.8, 87.30, 87.34, 114.0, 114.4, 119.3, 125.8, 132.0, 133.5, 136.9, 160.0, 163.5; IR (neat) 3078, 3007, 2935, 2838, 2227, 1656, 1606, 1510, 1289, 1250, 1007, 832  $\text{cm}^{-1}$ ; HRMS (EI) calcd for  $\text{C}_{17}\text{H}_{16}\text{O}_2$ : 252.1150  $[\text{M}]^+$ ; found: 252.1153.

**tert-Butyl 2-allyl-5-methylene-2-(phenylethynyl)-2,5-dihydro-1H-pyrrole-1-carboxylate (6h)**

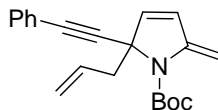

Colorless oil (72.3 mg, 45% yield).  $^1\text{H}$  NMR (400 MHz,  $\text{CDCl}_3$ )  $\delta$  1.56 (s, 9H), 2.87–3.01 (m, 2H), 4.46 (s, 1H), 5.11 (s, 1H), 5.15 (d,  $J = 4.8$  Hz, 1H), 5.36 (br, 1H), 5.66–5.76 (m, 1H), 5.95 (d,  $J = 5.6$  Hz, 1H), 6.11 (d,  $J = 5.6$  Hz, 1H), 7.30–7.33 (m, 3H), 7.39–7.40 (m, 2H);  $^{13}\text{C}$  NMR (100 MHz,  $\text{CDCl}_3$ )  $\delta$  28.6, 43.4, 68.2, 81.5, 84.6, 87.6, 92.0, 119.4, 123.0, 128.4, 128.7, 131.7, 131.8, 133.6, 147.4, 151.7; IR (neat) 3080, 2978, 2929, 2229, 1782, 1713, 1371, 1167, 919, 757, 691  $\text{cm}^{-1}$ ; HRMS (EI) calcd for  $\text{C}_{21}\text{H}_{23}\text{NO}_2$ : 321.1729  $[\text{M}]^+$ ; found: 321.1732.

## Method B:

### Representative Procedure for Obtaining Products 2a–2d and 6a–6g:

Allyltributylstannane (165.56 mg, 0.5 mmol) and **1a** (66.31 mg, 0.5 mmol) were added to a solution of Pd<sub>2</sub>(dba)<sub>3</sub> (22.90 mg, 0.025 mmol) and PPh<sub>3</sub> (26.23 mg, 0.1 mmol) in acetone (3 mL) or CH<sub>2</sub>Cl<sub>2</sub> (3 mL) at room temperature. The reaction mixture was stirred under N<sub>2</sub> atmosphere at room temperature. The reaction progress was monitored by TLC. After the starting material **1a** was consumed (10 h), 2-methylbenzoic acid (0.14 g, 1 mmol) was added into the mixture. The resulting mixture was stirred at room temperature for another 10 h, and then, the solvent was removed under reduced pressure. The residue obtained was purified by column chromatography on basic alumina (eluent: petroleum ether) to afford 2-allyl-5-methylthiophene (**2a**) in 60% yield (41.5 mg) as a colorless oil.

#### 2-Allyl-5-methylthiophene (**2a**)

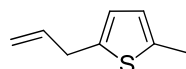

Colorless oil (41.5 mg, 60% yield). <sup>1</sup>H NMR (400 MHz, CDCl<sub>3</sub>) δ 2.42 (s, 3H), 3.48 (d, *J* = 6.4 Hz, 2H), 5.06–5.15 (m, 2H), 5.91–6.01 (m, 1H), 6.56 (s, 2H); <sup>13</sup>C NMR (100 MHz, CDCl<sub>3</sub>) δ 15.4, 34.6, 116.1, 124.5, 124.9, 136.9, 138.2, 140.7; IR (neat) 3065, 2958, 2922, 2855, 1640, 1453, 991, 915, 795 cm<sup>-1</sup>; HRMS (EI) calcd for C<sub>8</sub>H<sub>10</sub>S: 138.0503 [M]<sup>+</sup>; found: 138.0508.

#### 5-Allyl-3-bromo-2-methylthiophene (**2b**)

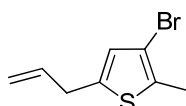

Colorless oil (89.0 mg, 82% yield). <sup>1</sup>H NMR (400 MHz, CDCl<sub>3</sub>) δ 2.33 (s, 3H), 3.45 (d, *J* = 6.4 Hz, 2H), 5.13 (dd, *J* = 11.2, 18.4 Hz, 2H), 5.87–5.97 (m, 1H), 6.60 (s, 1H); <sup>13</sup>C NMR (100 MHz, CDCl<sub>3</sub>) δ 14.7, 34.3, 108.2, 116.8, 127.18, 127.25, 132.3, 135.7, 140.0; IR (neat) 2955, 2923, 2852, 1640, 1458, 1069, 918, 797 cm<sup>-1</sup>; HRMS (EI) calcd for C<sub>8</sub>H<sub>9</sub>BrS: 215.9608 [M]<sup>+</sup>; found: 215.9617.

#### 5-Allyl-3-chloro-2-methylthiophene (**2c**)

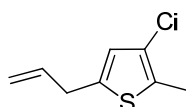

Colorless oil (64.8 mg, 75% yield). <sup>1</sup>H NMR (400 MHz, CDCl<sub>3</sub>) δ 2.32 (s, 3H), 3.43 (d, *J* = 6.8 Hz, 2H), 5.09–5.17 (m, 2H), 5.86–5.96 (m, 1H), 6.56 (s, 1H); <sup>13</sup>C NMR (100 MHz, CDCl<sub>3</sub>) δ 13.1, 34.5, 117.0, 121.6, 125.1, 130.3, 135.9, 139.1; IR (neat) 3080, 2921, 2851, 1666, 1641, 1430, 1342, 991, 921, 822 cm<sup>-1</sup>; HRMS (EI) calcd for

C<sub>8</sub>H<sub>9</sub>ClS: 172.0113 [M]<sup>+</sup>; found: 172.0117.

**2-Allyl-3-bromo-5-methylthiophene (2d)**

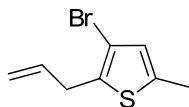

Colorless oil (63.0 mg, 58% yield). <sup>1</sup>H NMR (400 MHz, CDCl<sub>3</sub>) δ 2.41 (s, 3H), 3.45 (d, *J* = 6.4 Hz, 2H), 5.09–5.15 (m, 2H), 5.86–5.94 (m, 1H), 6.58 (s, 1H); <sup>13</sup>C NMR (100 MHz, CDCl<sub>3</sub>) δ 15.5, 33.6, 107.8, 116.8, 127.8, 127.9, 134.7, 135.2, 138.1; IR (neat) 2923, 2854, 1638, 1544, 1174, 990, 917, 816 cm<sup>-1</sup>; HRMS (EI) calcd for C<sub>8</sub>H<sub>9</sub>BrS: 215.9608 [M]<sup>+</sup>; found: 215.9616.

**2-Allyl-5-methyl-1-tosyl-1H-pyrrole (6a)**

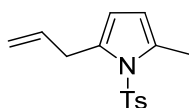

White solid (110.1 mg, 80% yield), mp 50–51 °C. <sup>1</sup>H NMR (400 MHz, CDCl<sub>3</sub>) δ 2.37 (s, 3H), 2.40 (s, 3H), 3.56 (d, *J* = 6.4 Hz, 2H), 5.07–5.12 (m, 2H), 5.89–5.99 (m, 3H), 7.28 (d, *J* = 8.0 Hz, 2H), 7.54 (d, *J* = 8.4 Hz, 2H); <sup>13</sup>C NMR (100 MHz, CDCl<sub>3</sub>) δ 15.8, 21.7, 33.6, 111.6, 112.1, 116.9, 126.3, 130.1, 132.9, 135.3, 135.4, 137.7, 144.6; IR (KBr) 3080, 2964, 2928, 1598, 1364, 1170, 1119, 994, 919, 687, 546 cm<sup>-1</sup>; HRMS (EI) calcd for C<sub>15</sub>H<sub>17</sub>NO<sub>2</sub>S: 275.0980 [M]<sup>+</sup>; found: 275.0980.

**2-Allyl-3-bromo-5-methyl-1-tosyl-1H-pyrrole (6b)**

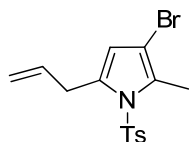

White solid (148.8 mg, 84% yield), mp 63–64 °C. <sup>1</sup>H NMR (400 MHz, CDCl<sub>3</sub>) δ 2.34 (s, 3H), 2.40 (s, 3H), 3.66 (d, *J* = 6.0 Hz, 2H), 5.00–5.05 (m, 2H), 5.83–5.93 (m, 1H), 5.98 (s, 1H), 7.28 (d, *J* = 8.4 Hz, 2H), 7.56 (d, *J* = 8.4 Hz, 2H); <sup>13</sup>C NMR (100 MHz, CDCl<sub>3</sub>) δ 15.5, 21.7, 31.1, 102.9, 115.1, 116.2, 126.5, 130.2, 131.0, 132.5, 134.8, 136.9, 145.0; IR (KBr) 3079, 2979, 2930, 1597, 1369, 1249, 1175, 1107, 986, 917, 811, 670, 547 cm<sup>-1</sup>; HRMS (EI) calcd for C<sub>15</sub>H<sub>16</sub>BrNO<sub>2</sub>S: 353.0085 [M]<sup>+</sup>; found: 353.0095.

**2-Allyl-5-methyl-3-(thiophen-2-ylethynyl)-1-tosyl-1H-pyrrole (6c)**

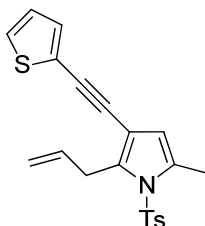



Colorless oil (150.7 mg, 79% yield).  $^1\text{H}$  NMR (400 MHz,  $\text{CDCl}_3$ )  $\delta$  2.33 (s, 3H), 2.39 (s, 3H), 3.79 (d,  $J = 6.0$  Hz, 2H), 5.03 (d,  $J = 9.6$  Hz, 1H), 5.13 (d,  $J = 16.8$  Hz, 1H), 5.93–6.01 (m, 1H), 6.03 (s, 1H), 6.96 (dd,  $J = 4.0, 4.8$  Hz, 1H), 7.18 (d,  $J = 3.6$  Hz, 1H), 7.23 (d,  $J = 5.2$  Hz, 1H), 7.27 (d,  $J = 8.4$  Hz, 2H), 7.57 (d,  $J = 8.0$  Hz, 2H);  $^{13}\text{C}$  NMR (100 MHz,  $\text{CDCl}_3$ )  $\delta$  15.5, 21.7, 32.0, 85.7, 86.8, 107.9, 114.2, 116.4, 123.7, 126.4, 127.0, 127.2, 130.2, 131.5, 132.2, 135.5, 137.0, 138.5, 145.0; IR (neat) 3107, 3077, 2977, 2928, 2206, 1637, 1597, 1367, 1283, 1173, 1116, 992, 917, 811, 677, 593, 544  $\text{cm}^{-1}$ ; HRMS (EI) calcd for  $\text{C}_{21}\text{H}_{19}\text{NO}_2\text{S}_2$ : 381.0857  $[\text{M}]^+$ ; found: 381.0867.

**2-Allyl-5-methyl-3-(phenylethynyl)-1-tosyl-1H-pyrrole (6d)**

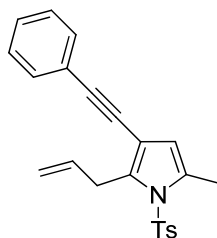

Colorless oil (140.8 mg, 75% yield).  $^1\text{H}$  NMR (400 MHz,  $\text{CDCl}_3$ )  $\delta$  2.34 (s, 3H), 2.39 (s, 3H), 3.82 (d,  $J = 6.4$  Hz, 2H), 5.04 (dd,  $J = 1.2, 10.0$  Hz, 1H), 5.14 (dd,  $J = 1.2, 16.8$  Hz, 1H), 5.95–6.04 (m, 1H), 6.05 (s, 1H), 7.28–7.31 (m, 5H), 7.44–7.46 (m, 2H), 7.57 (d,  $J = 8.0$  Hz, 2H);  $^{13}\text{C}$  NMR (100 MHz,  $\text{CDCl}_3$ )  $\delta$  15.5, 21.7, 32.0, 83.1, 92.6, 108.3, 114.3, 114.4, 116.3, 123.7, 126.4, 128.1, 128.4, 130.1, 131.4, 132.1, 135.6, 137.1, 138.4, 145.0; IR (neat) 3078, 2977, 2929, 2854, 2212, 1598, 1489, 1367, 1295, 1175, 913, 811, 756, 592, 545  $\text{cm}^{-1}$ ; HRMS (EI) calcd for  $\text{C}_{23}\text{H}_{21}\text{NO}_2\text{S}_2$ : 375.1293  $[\text{M}]^+$ ; found: 375.1296.

**2-Allyl-5-methyl-3-(p-tolylethynyl)-1-tosyl-1H-pyrrole (6e)**

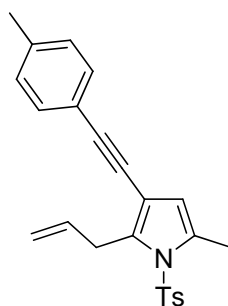

Colorless oil (148.0 mg, 76% yield).  $^1\text{H}$  NMR (400 MHz,  $\text{CDCl}_3$ )  $\delta$  2.33 (s, 3H), 2.34 (s, 3H), 2.39 (s, 3H), 3.81 (d,  $J = 6.0$  Hz, 2H), 5.03 (d,  $J = 10.0$  Hz, 1H), 5.13 (d,  $J = 17.2$  Hz, 1H), 5.95–6.01 (m, 1H), 6.04 (s, 1H), 7.12 (d,  $J = 8.0$  Hz, 2H), 7.27 (d,  $J = 8.0$  Hz, 2H), 7.35 (d,  $J = 8.0$  Hz, 2H), 7.56 (d,  $J = 8.0$  Hz, 2H);  $^{13}\text{C}$  NMR (100 MHz,  $\text{CDCl}_3$ )  $\delta$  15.5, 21.6, 21.7, 32.0, 82.3, 92.8, 108.4, 114.4, 116.2, 120.6, 126.4, 129.2, 130.1, 131.3, 132.1, 135.7, 137.1, 138.2, 144.9; IR (neat) 3077, 3028, 2977, 2926,

2211, 1597, 1506, 1367, 1295, 1174, 1130, 912, 815, 677, 591, 545  $\text{cm}^{-1}$ ; HRMS (EI) calcd for  $\text{C}_{24}\text{H}_{23}\text{NO}_2\text{S}$ : 389.1450  $[\text{M}]^+$ ; found: 389.1454.

**2-Allyl-5-methyl-3-(4-methylstyryl)-1-tosyl-1H-pyrrole (6f)**

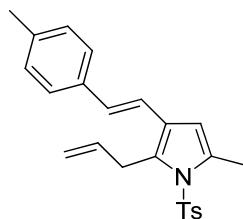

Colorless oil (131.2 mg, 67% yield).  $^1\text{H}$  NMR (400 MHz,  $\text{CDCl}_3$ )  $\delta$  2.26 (s, 3H), 2.31 (s, 3H), 2.40 (s, 3H), 3.63 (d,  $J = 5.6$  Hz, 2H), 4.95–5.00 (m, 2H), 5.73 (s, 1H), 5.85–5.93 (m, 1H), 6.24 (d,  $J = 12.0$  Hz, 1H), 6.45 (d,  $J = 12.0$  Hz, 1H), 7.01 (d,  $J = 8.0$  Hz, 2H), 7.13 (d,  $J = 8.0$  Hz, 2H), 7.27 (d,  $J = 8.0$  Hz, 2H), 7.55 (d,  $J = 8.4$  Hz, 2H);  $^{13}\text{C}$  NMR (100 MHz,  $\text{CDCl}_3$ )  $\delta$  15.8, 21.5, 21.8, 30.5, 113.3, 115.6, 120.8, 122.8, 126.4, 128.9, 129.0, 130.0, 130.1, 132.1, 132.2, 134.8, 136.0, 136.9, 137.7, 144.6; IR (neat) 3016, 2977, 2927, 1597, 1529, 1364, 1170, 1093, 914, 812, 670, 597, 544  $\text{cm}^{-1}$ ; HRMS (EI) calcd for  $\text{C}_{24}\text{H}_{25}\text{NO}_2\text{S}$ : 391.1606  $[\text{M}]^+$ ; found: 391.1611.

**tert-Butyl 2-allyl-5-methyl-1H-pyrrole-1-carboxylate (6g)**

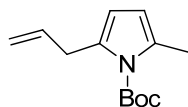

Colorless oil (78.6 mg, 71% yield).  $^1\text{H}$  NMR (400 MHz,  $\text{CDCl}_3$ )  $\delta$  1.58 (s, 9H), 2.38 (s, 3H), 3.55 (d,  $J = 6.0$  Hz, 2H), 5.01–5.06 (m, 2H), 5.82 (d,  $J = 3.6$  Hz, 2H), 5.94–6.01 (m, 1H);  $^{13}\text{C}$  NMR (100 MHz,  $\text{CDCl}_3$ )  $\delta$  16.6, 28.2, 34.2, 83.6, 110.2, 110.3, 115.9, 131.8, 133.5, 136.4, 150.5; IR (neat) 3080, 2979, 2929, 1739, 1317, 1172, 1122, 852, 786  $\text{cm}^{-1}$ ; HRMS (EI) calcd for  $\text{C}_{13}\text{H}_{19}\text{NO}_2$ : 221.1416  $[\text{M}]^+$ ; found: 221.1426.

## 4. References

- (1) Diliën, H.; Chambon, S.; Cleij, T. J.; Lutsen, L.; Vanderzande, D.; Adriaensens, P. *J. Macromolecules* **2011**, *44*, 4711.
- (2) Erdelmeier, I.; Tailhan-Lomont, C.; Moutet, M.; Chaudiere, J.; Yadan, J.-C. US6525040 B1, **2003**.
- (3) Mandal, M.; Zhu, Z.; Cumming, J. N.; Liu, X.; Strickland, C.; Mazzola, R. D.; Caldwell, J. P.; Leach, P.; Grzelak, M.; Hyde, L.; Zhang, Q.; Terracina, G.; Zhang, L.; Chen, X.; Kuvelkar, R.; Kennedy, M. E.; Favreau, L.; Cox, K.; Orth, P.; Buevich, A.; Voigt, J.; Wang, H.; Kazakevich, I.; McKittrick, B. A.; Greenlee, W.;

- Parker, E. M.; Stamford, A. W. *J. Med. Chem.* **2012**, *55*, 9331.
- (4) Van Breemen, A. J. J. M.; Herwig, P. T.; Chlon, C. H. T.; Sweelssen, J.; Schoo, H. F. M.; Setayesh, S.; Hardeman, W. M.; Martin, C. A.; De Leeuw, D. M.; Valetton, J. J. P.; Bastiaansen, C. W. M.; Broer, D. J.; Popa-Merticaru, A. R.; Meskers, S. C. J. *J. Am. Chem. Soc.* **2006**, *128*, 2336.
- (5) Zheng, C.; Pu, S.; Xu, J.; Luo, M.; Huang, D.; Shen, L. *Tetrahedron* **2007**, *63*, 5437.
- (6) Boulos, J.; Jakubik, J.; Randakova, A.; Avila, C. *J. Heterocyclic. Chem.* **2013**, *50*, 1363.
- (7) Abell, A. D.; Nabbs, B. K.; Battersby, A. R. *J. Org. Chem.* **1998**, *63*, 8163.
- (8) Fuji, K.; Morimoto, T.; Tsutsumi, K.; Kakiuchi, K. *Chem. Commun.* **2005**, *26*, 3295.

## 5. Copies of $^1\text{H}$ and $^{13}\text{C}$ NMR Spectra of Starting Materials and Products

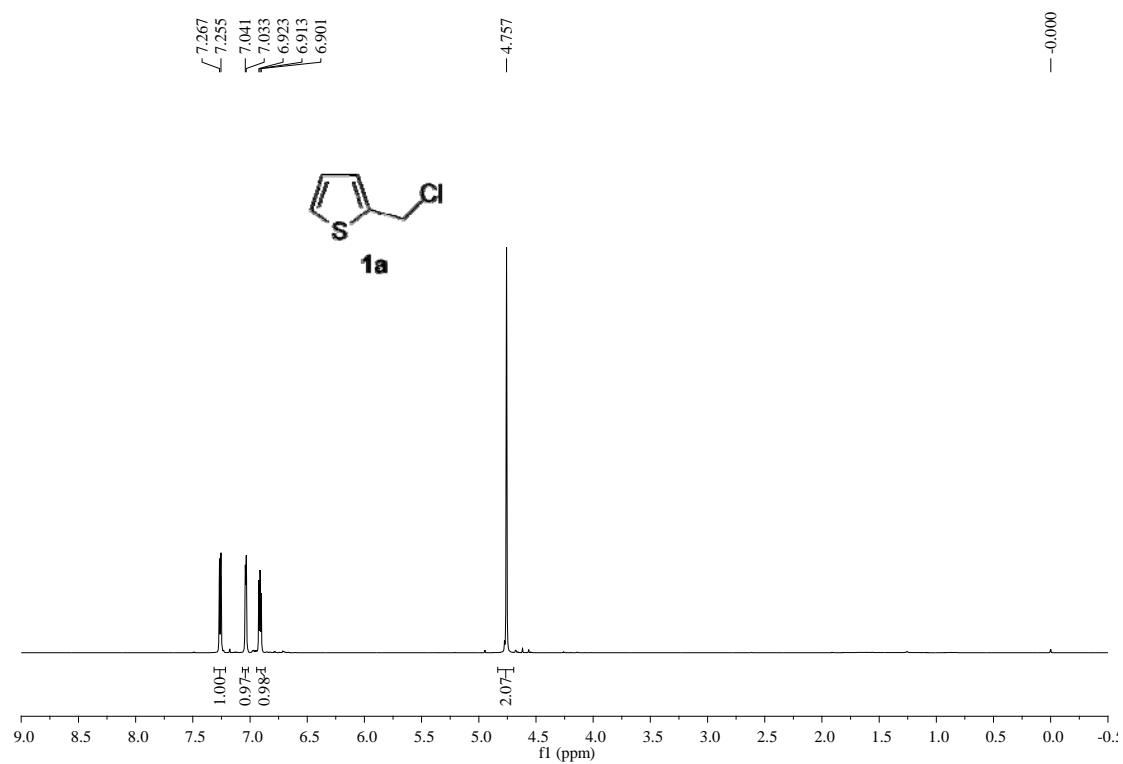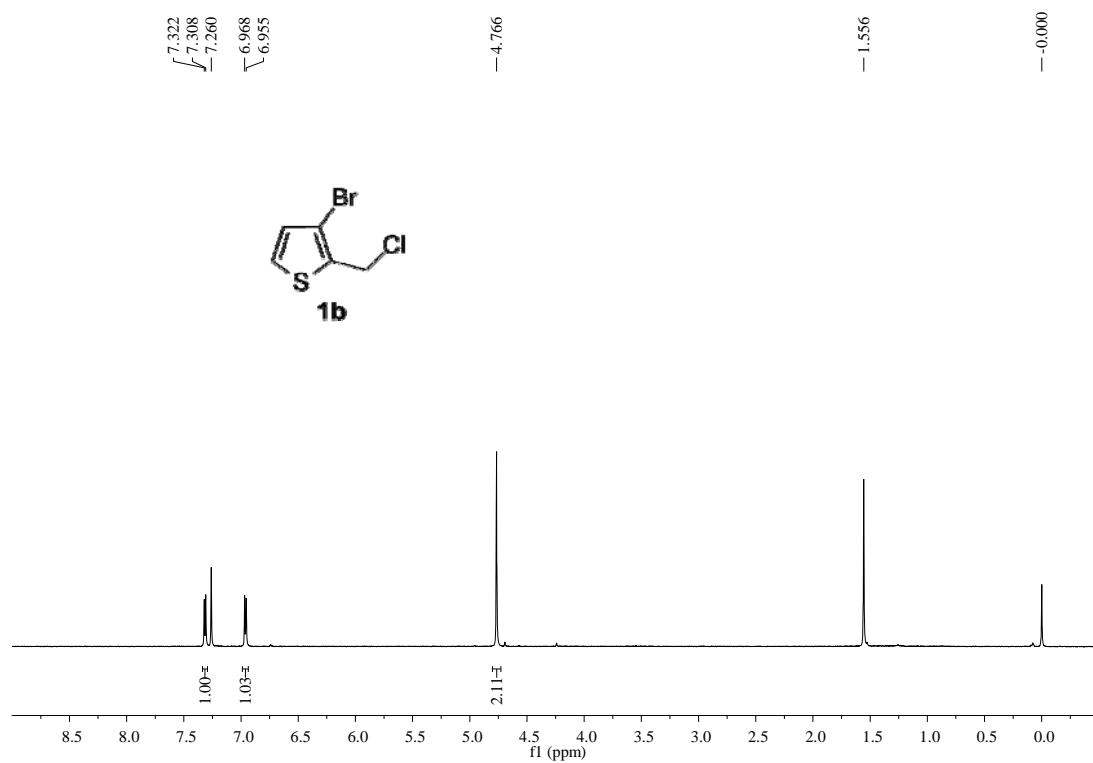

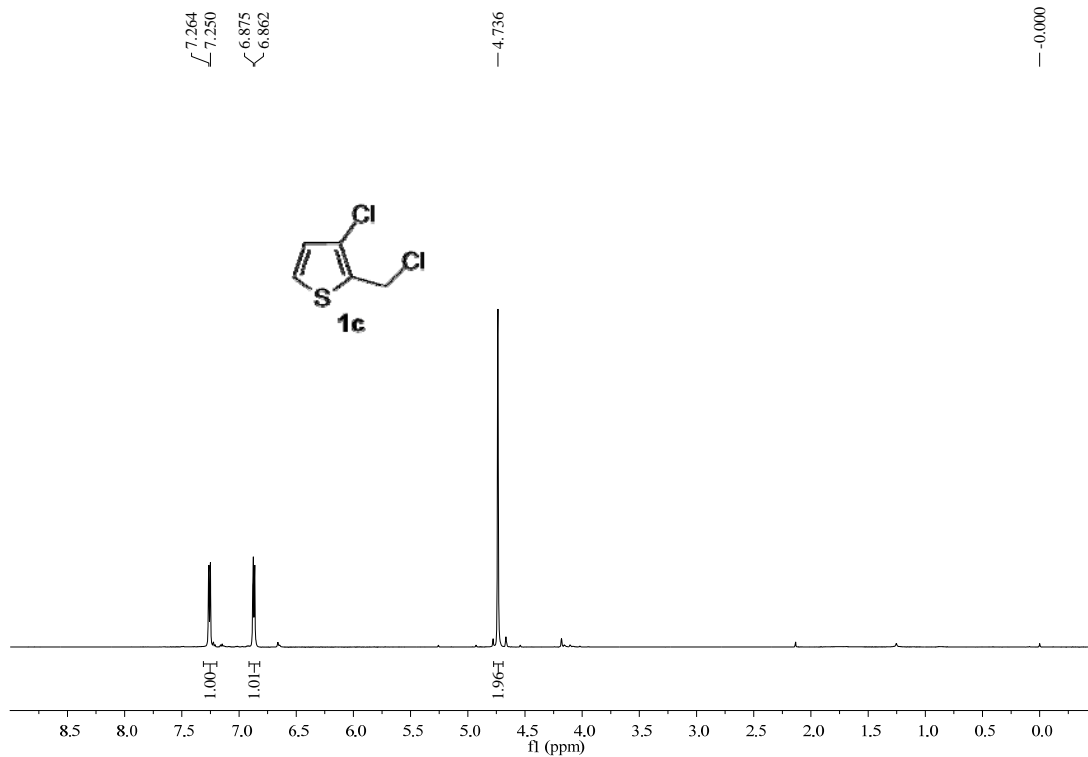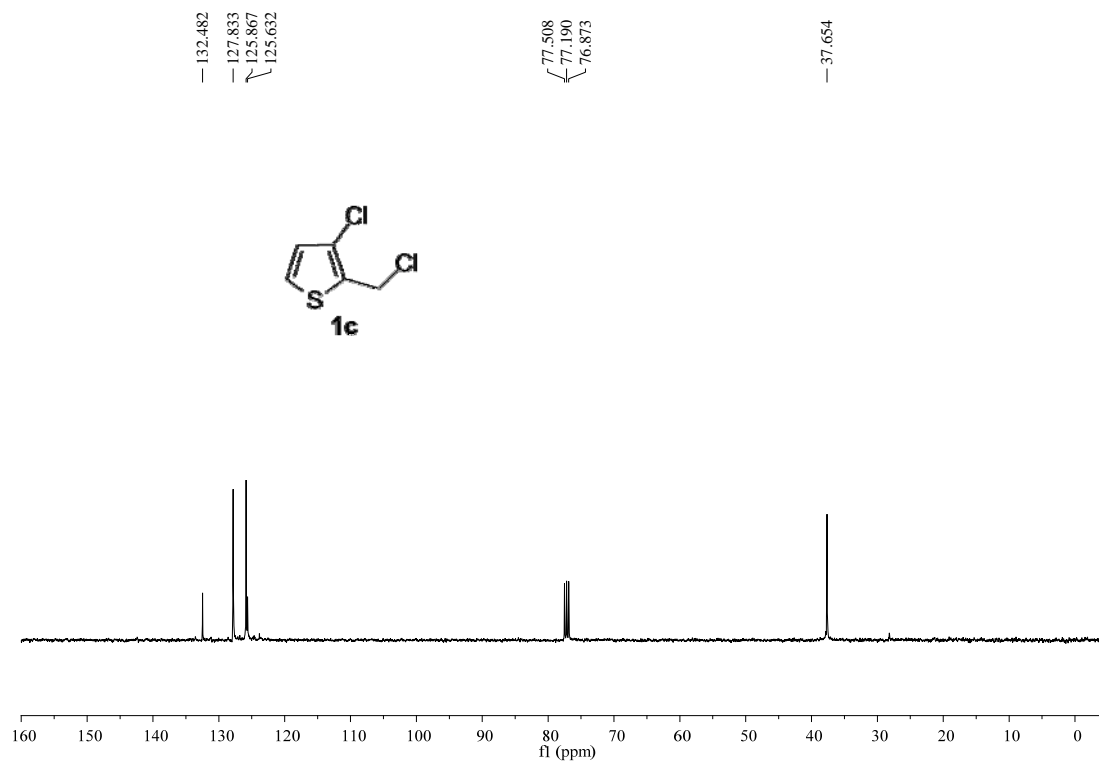

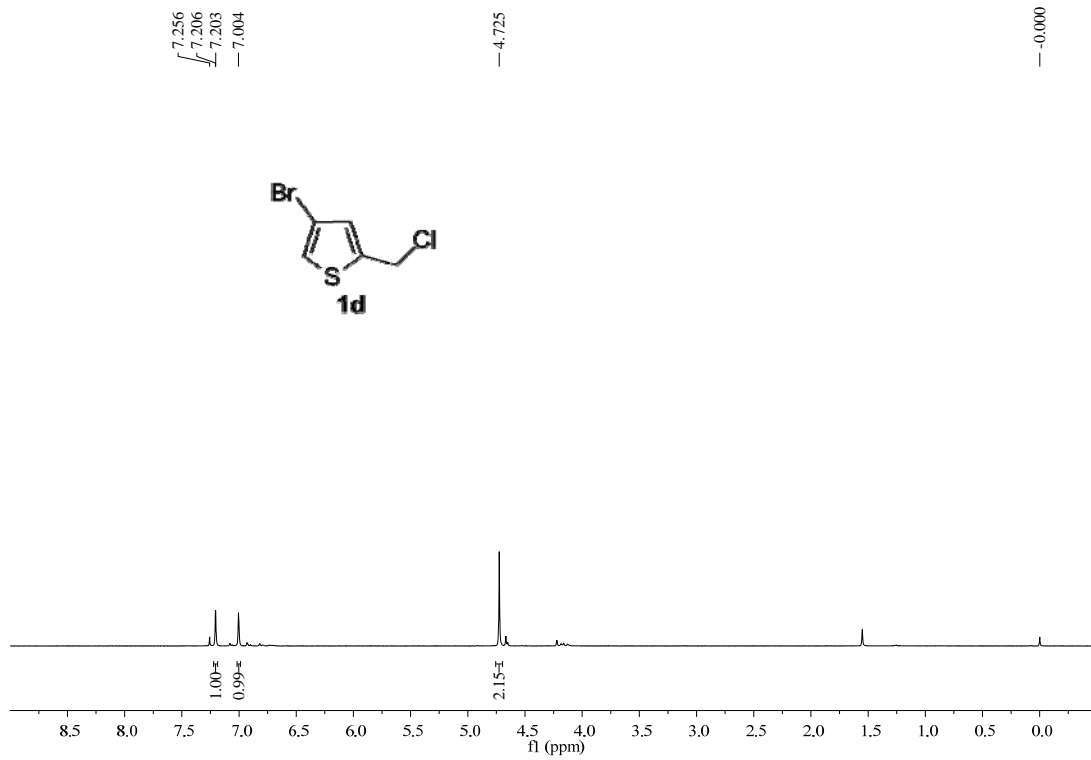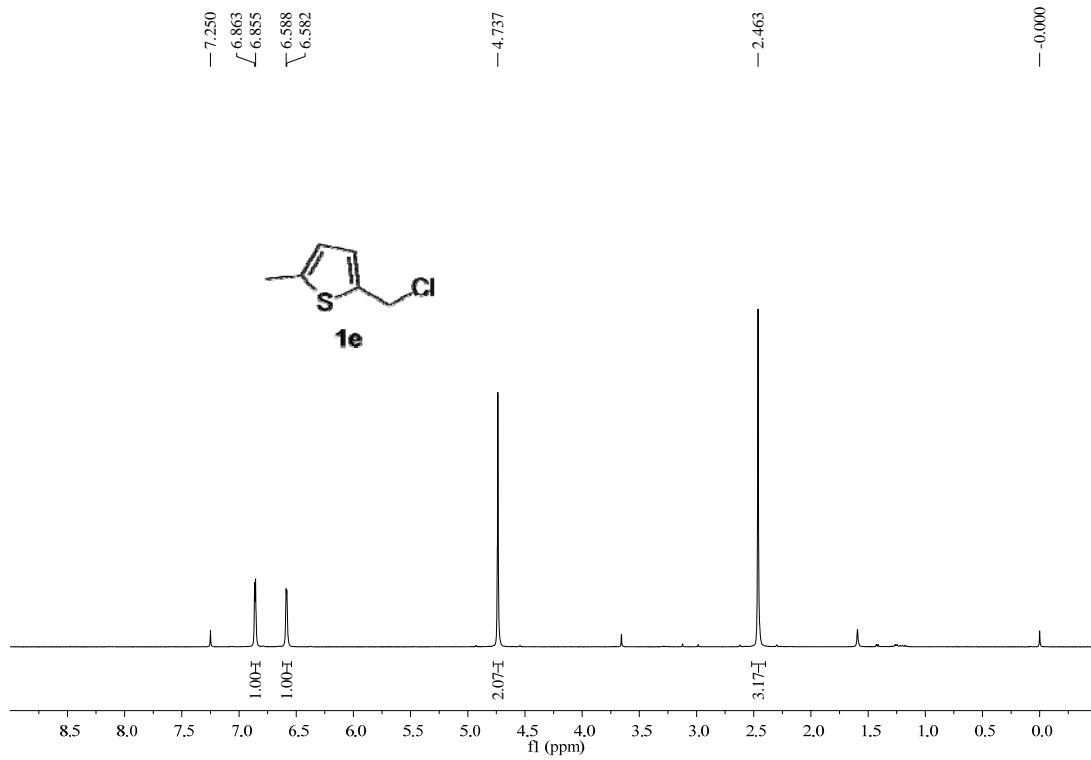

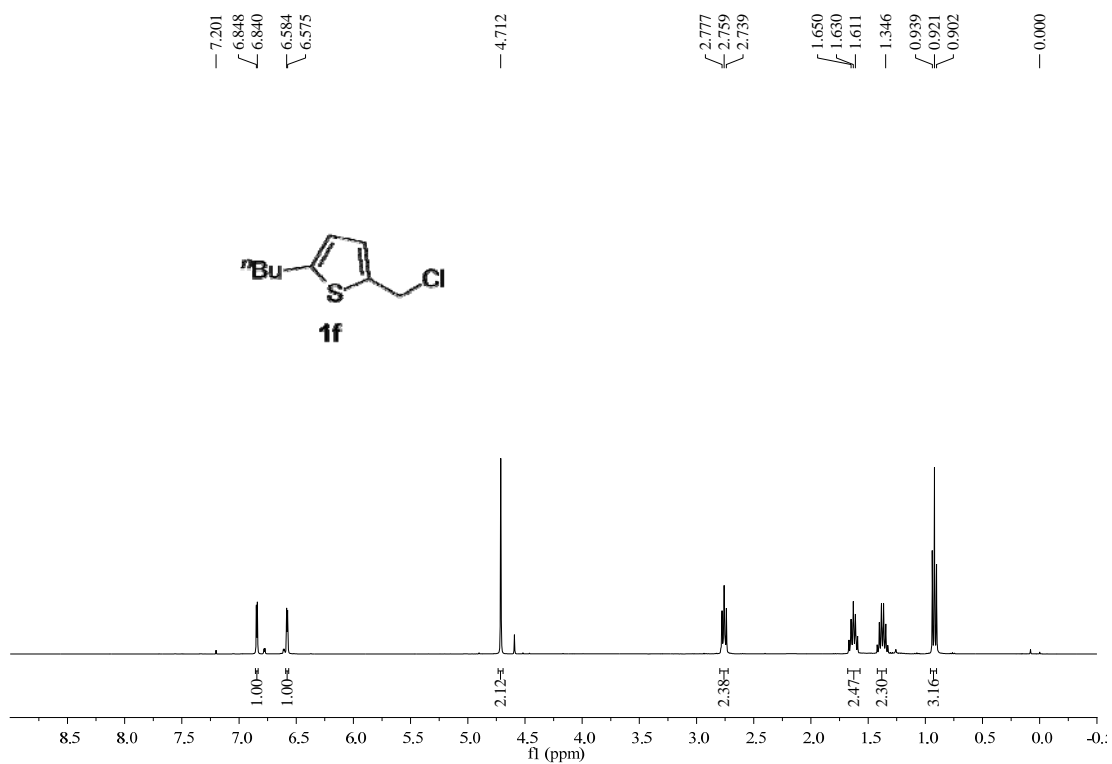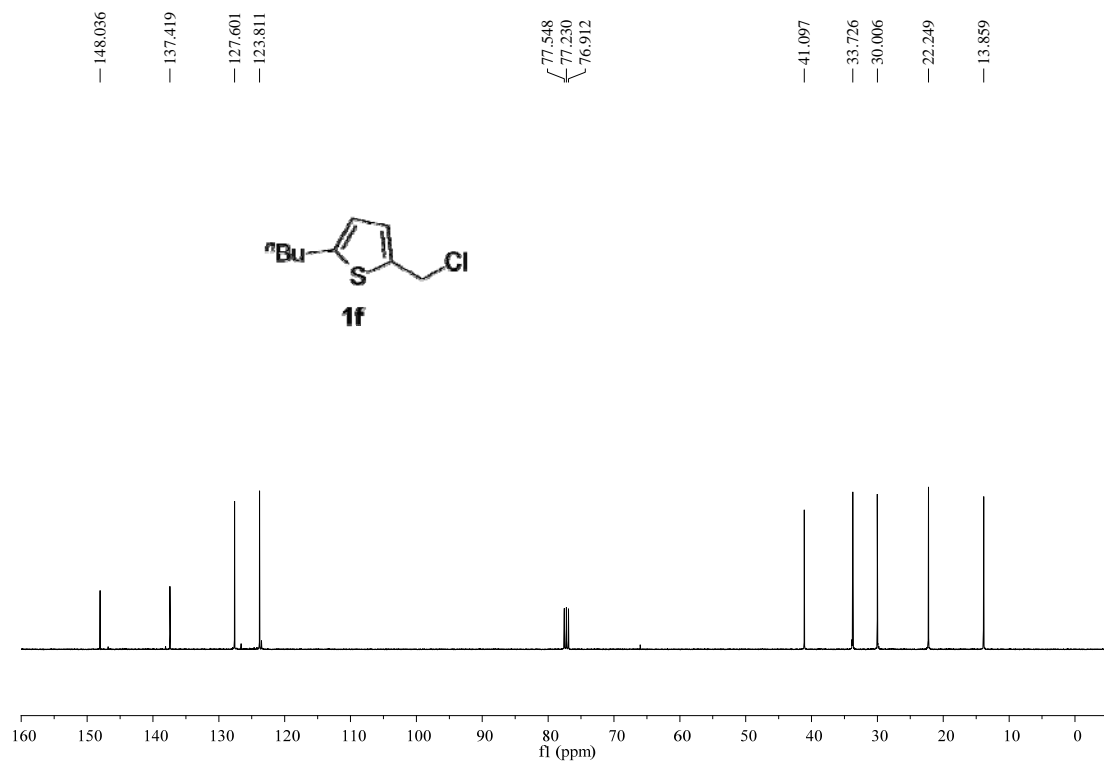

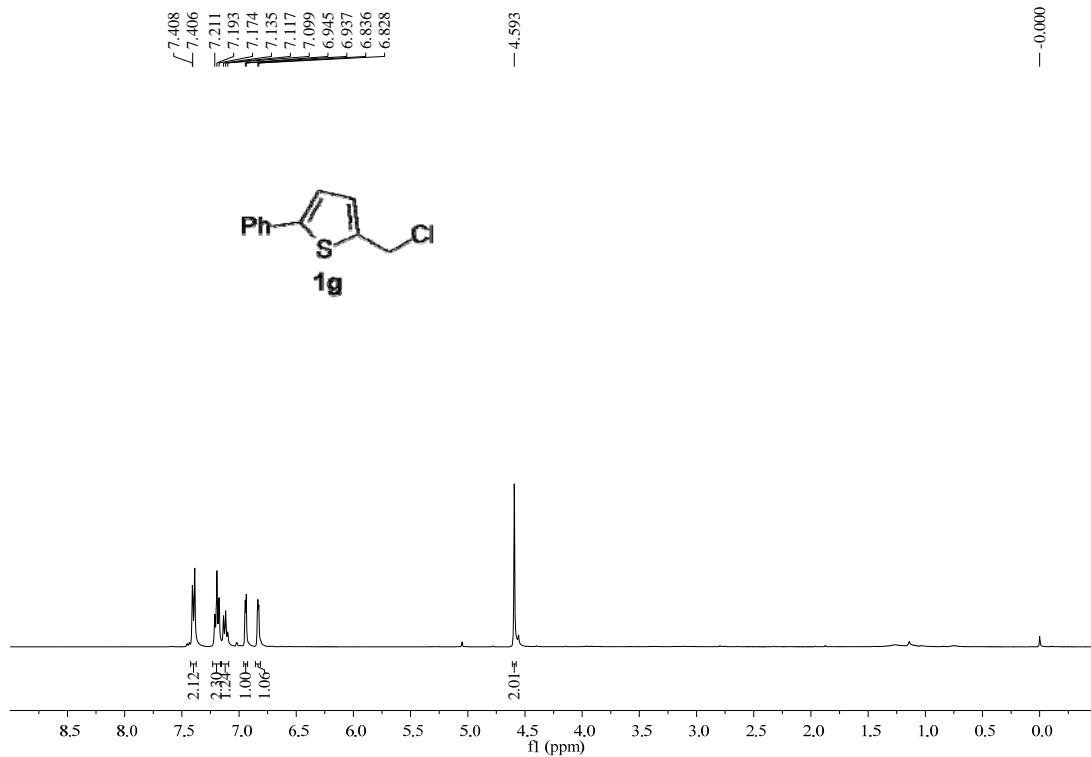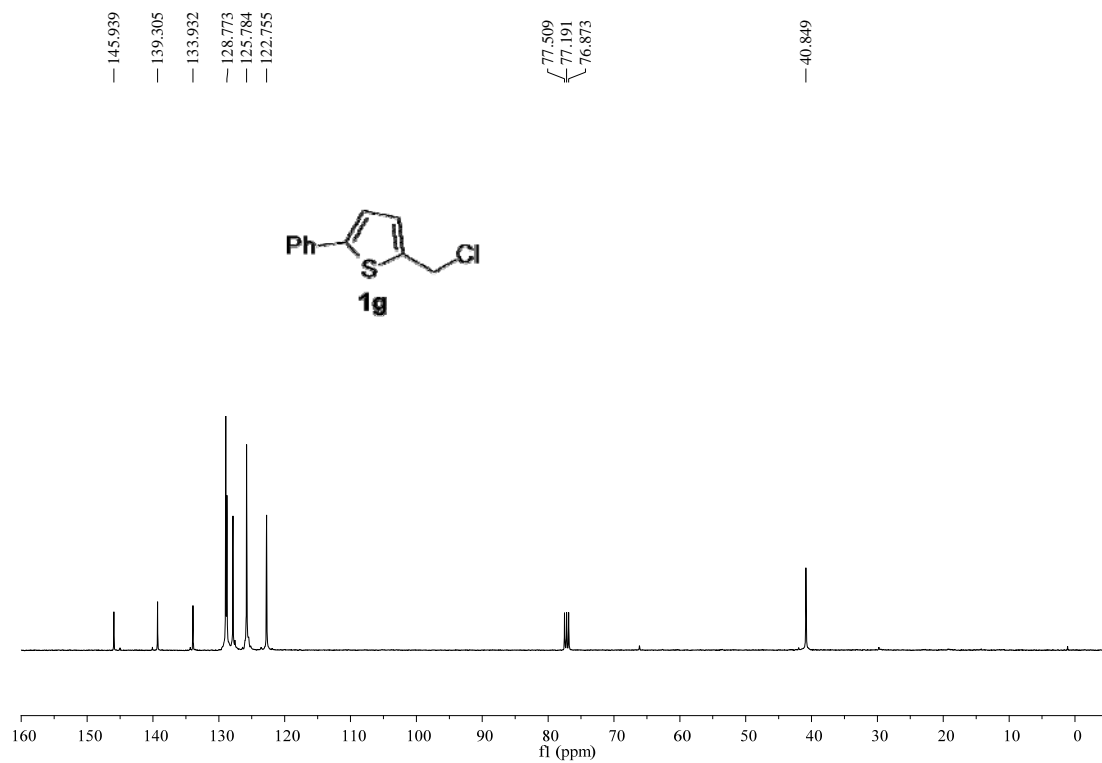



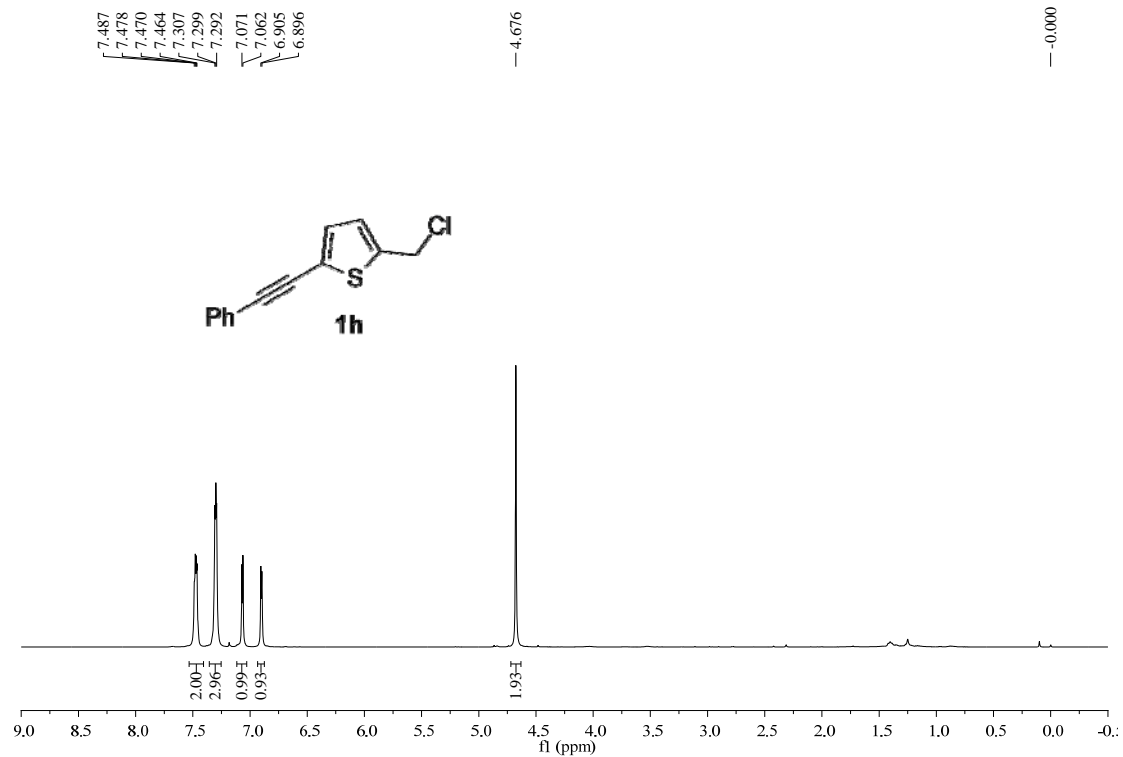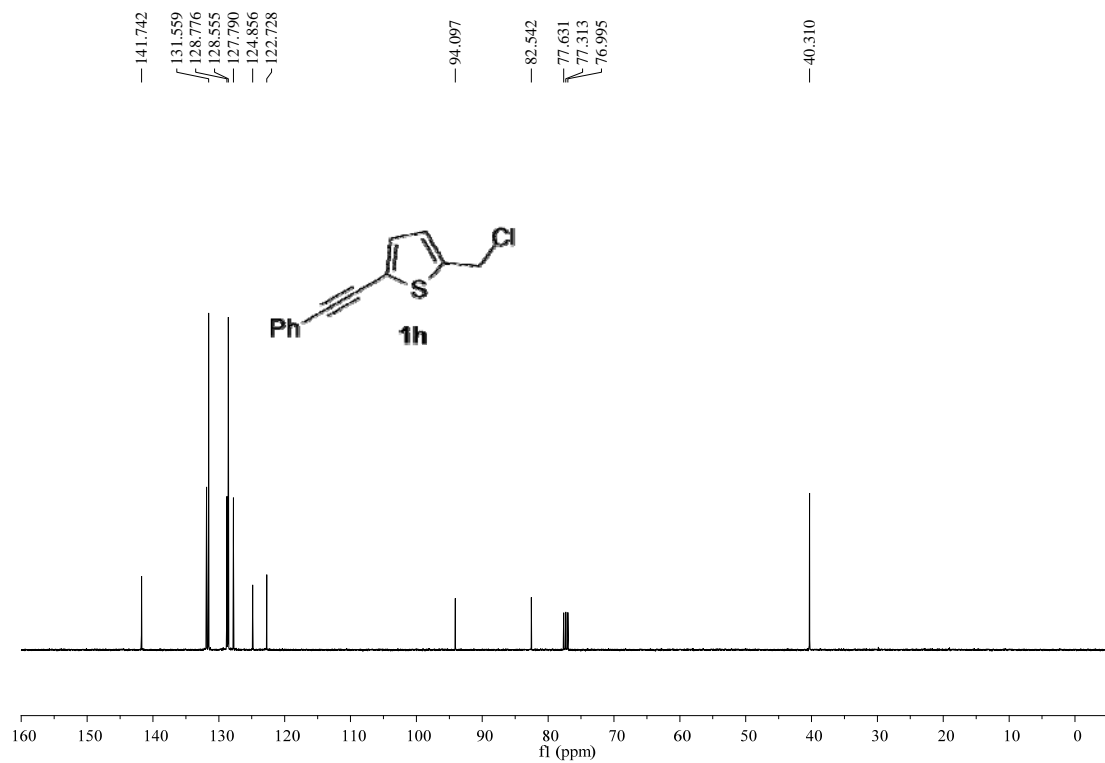

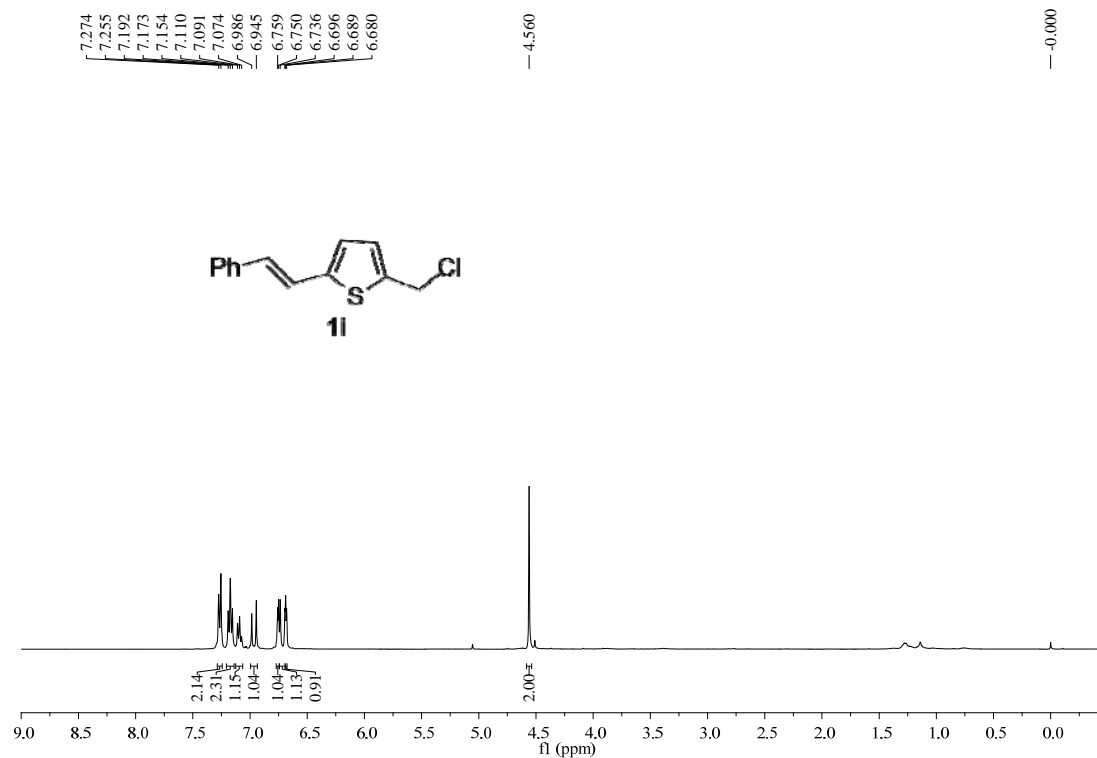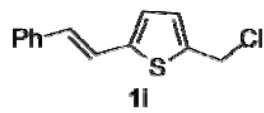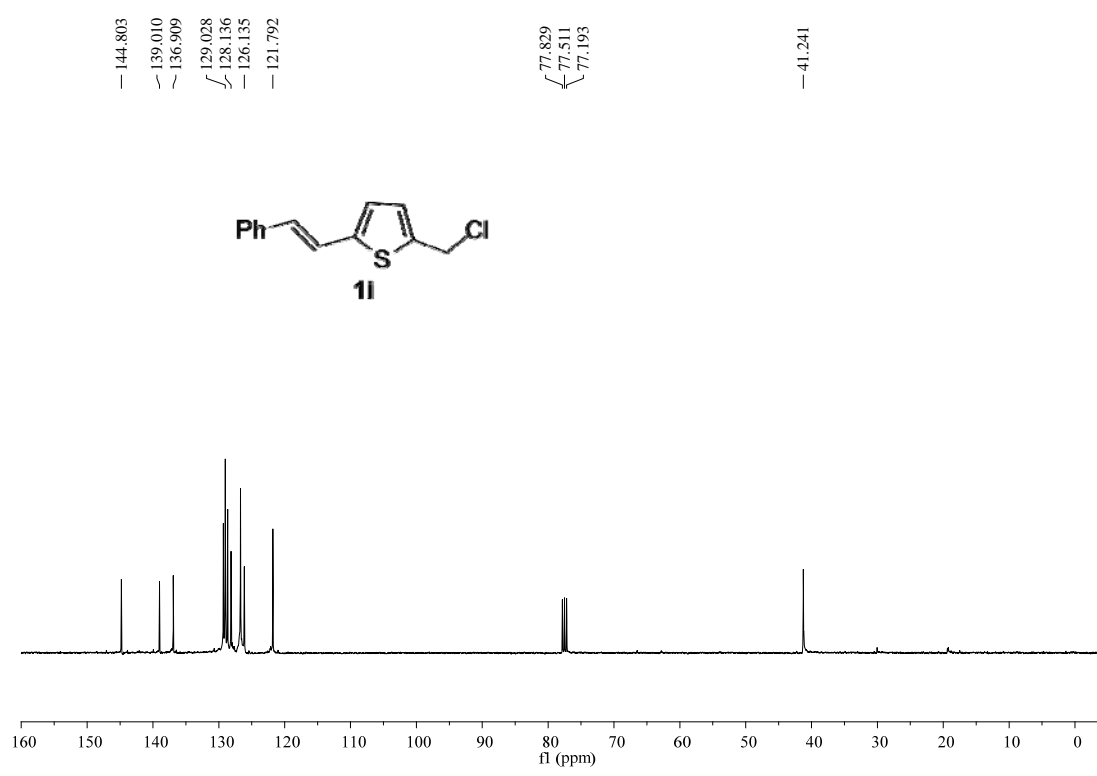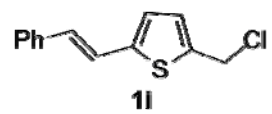

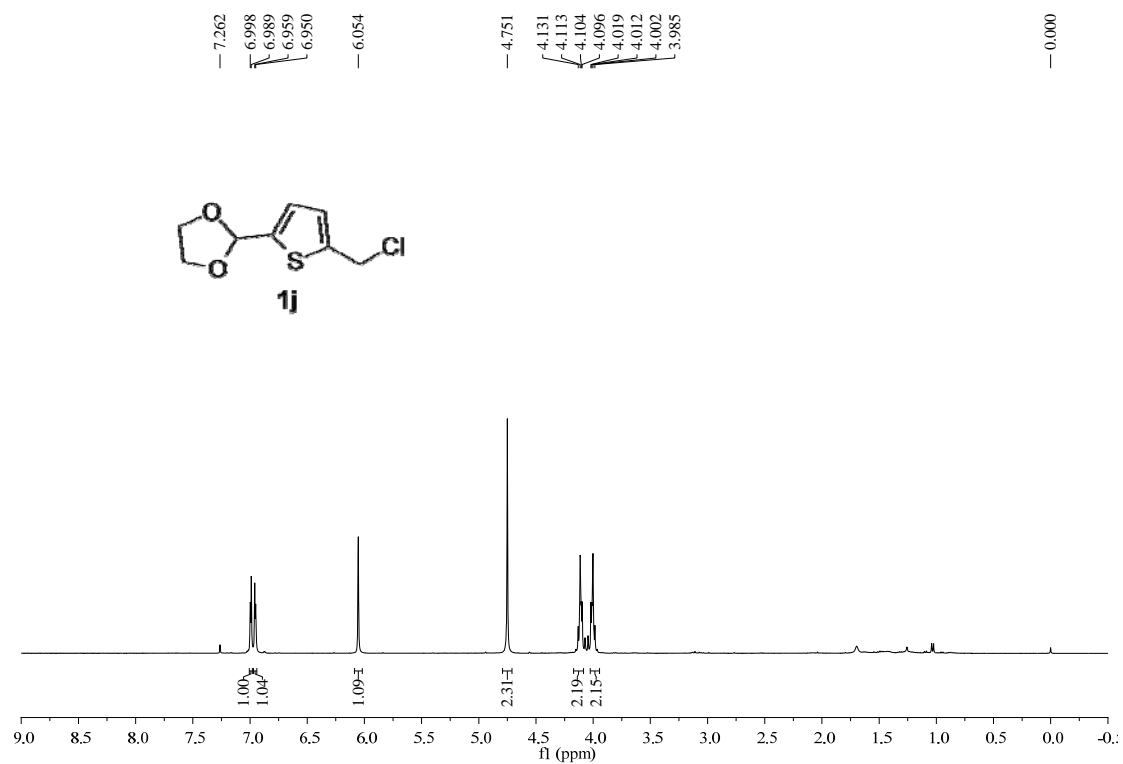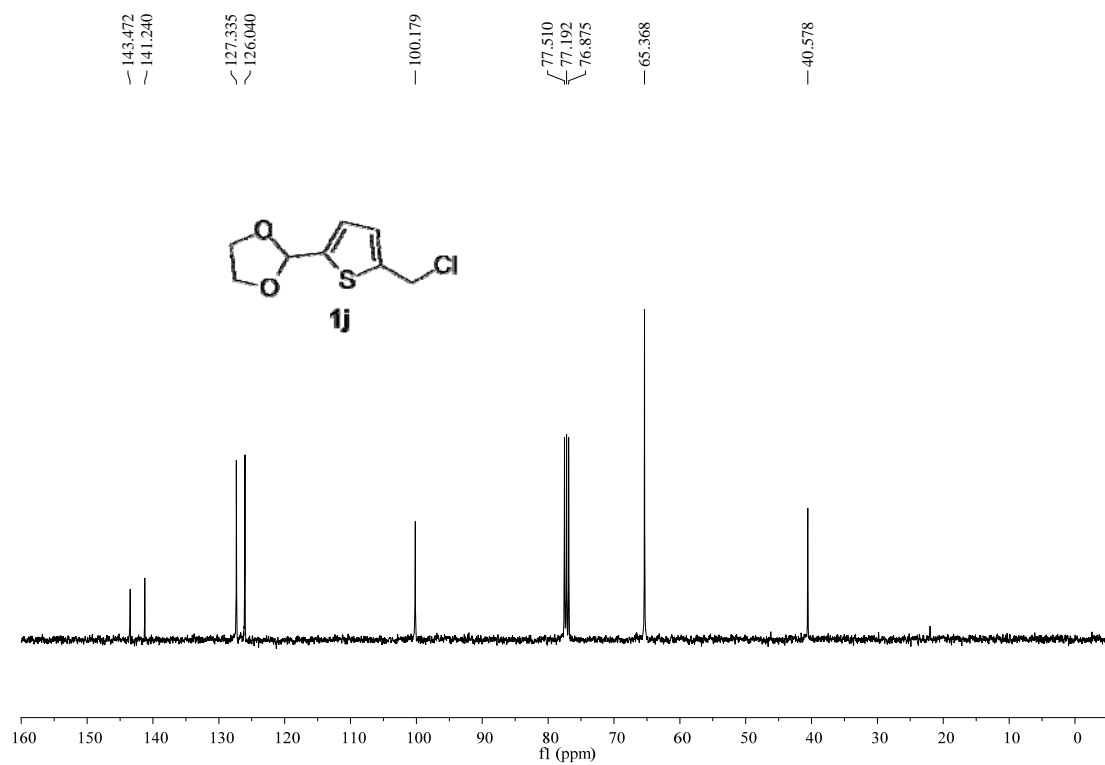

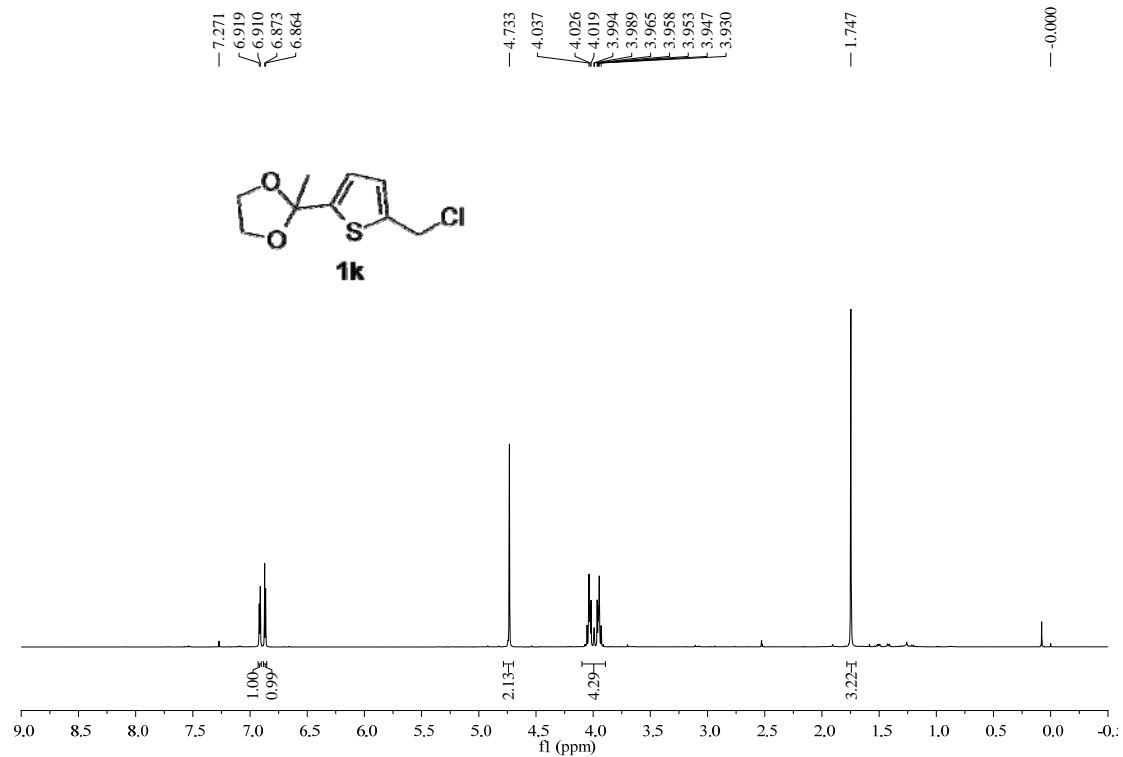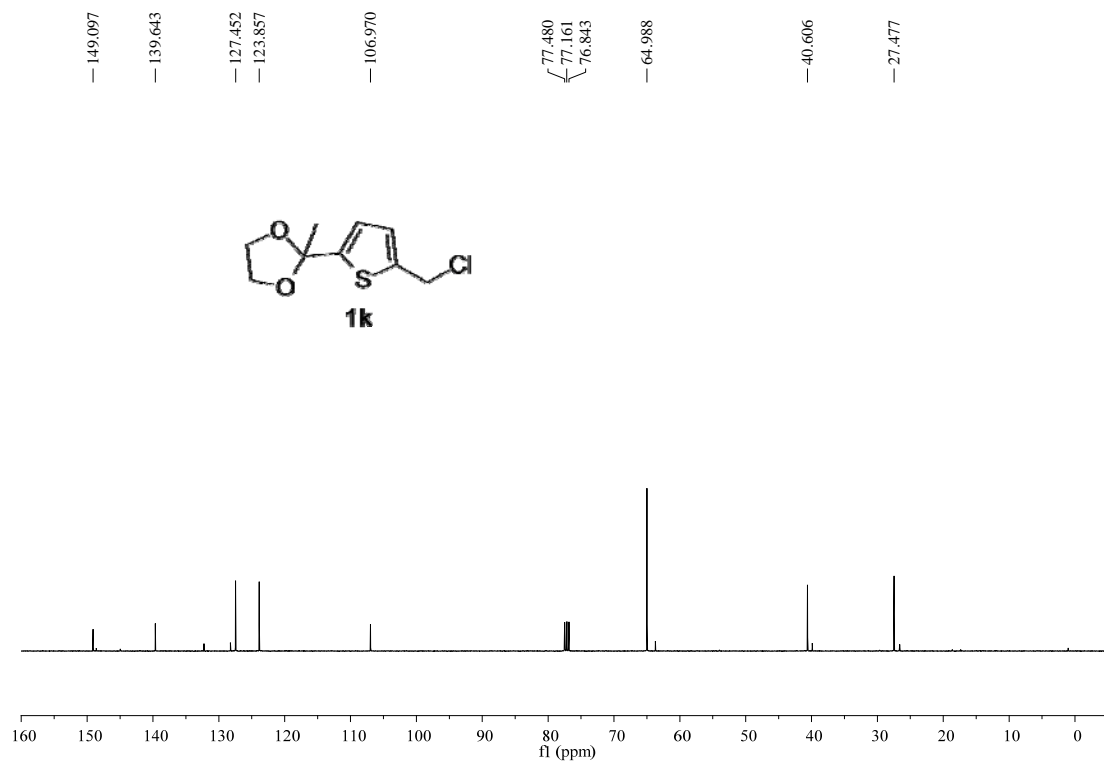

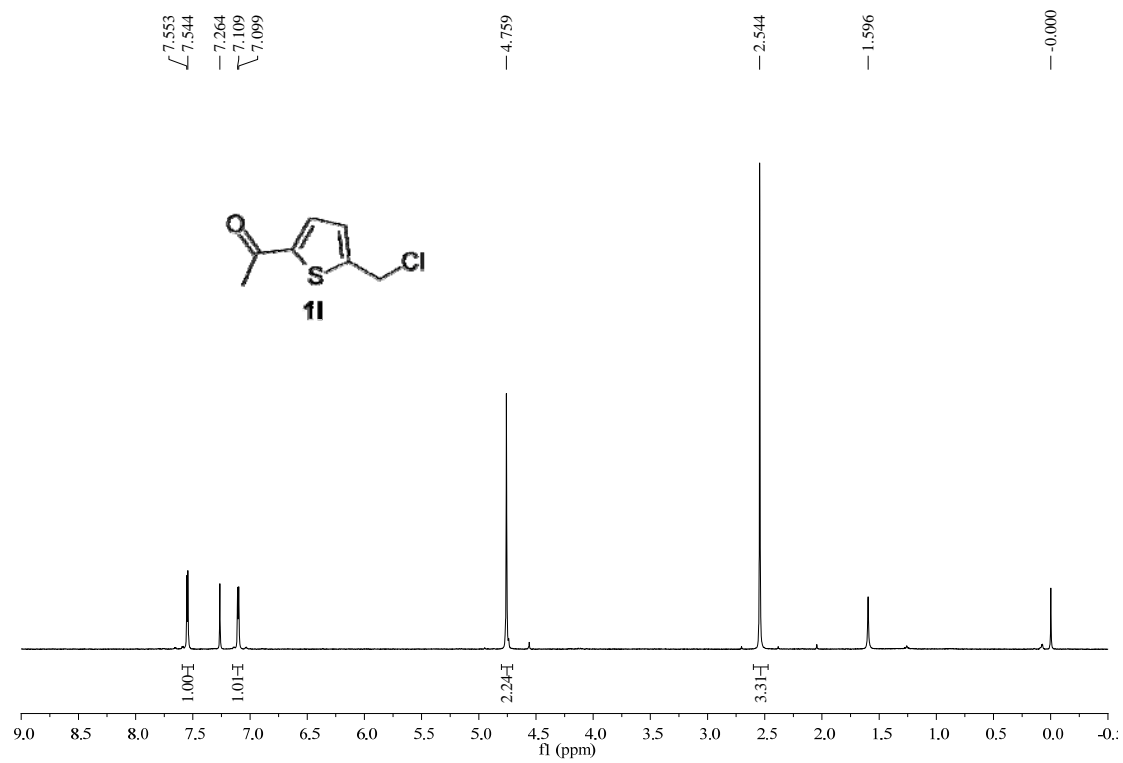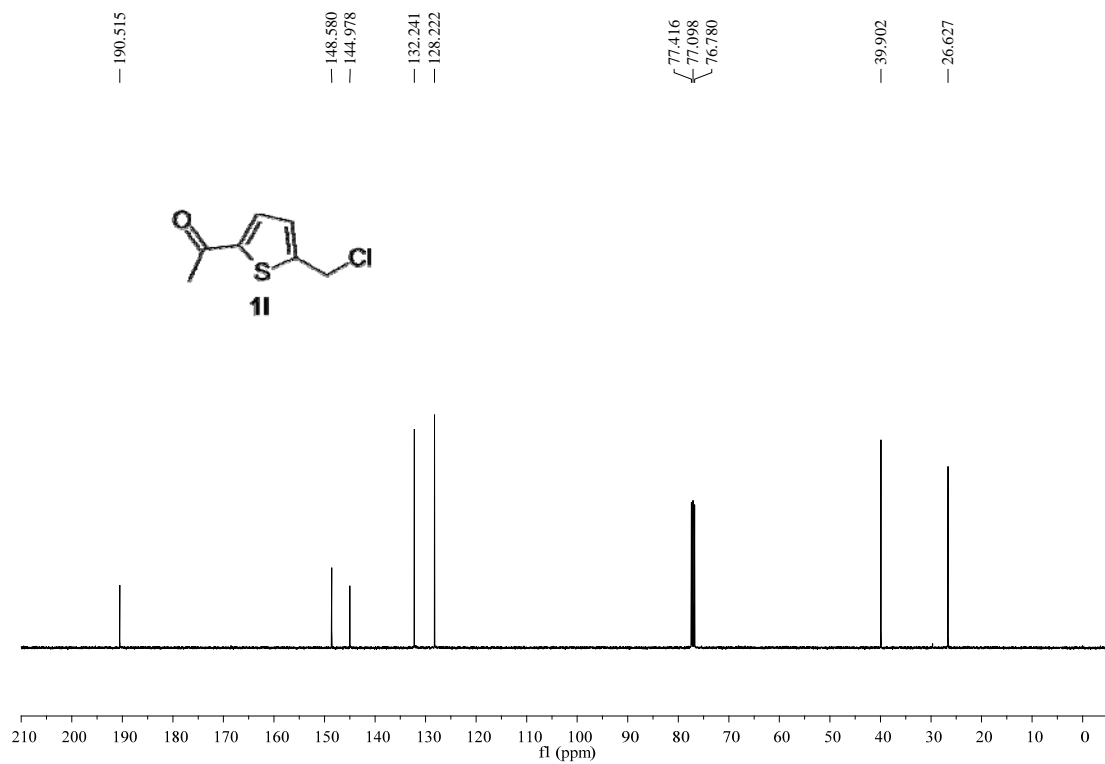

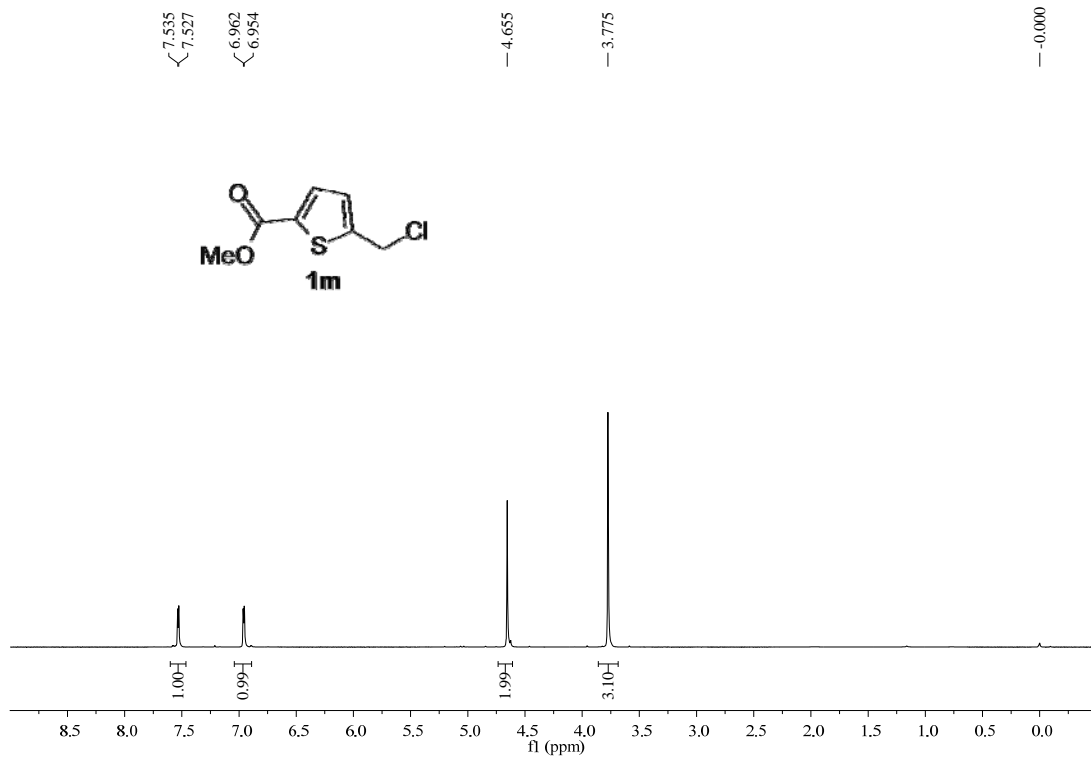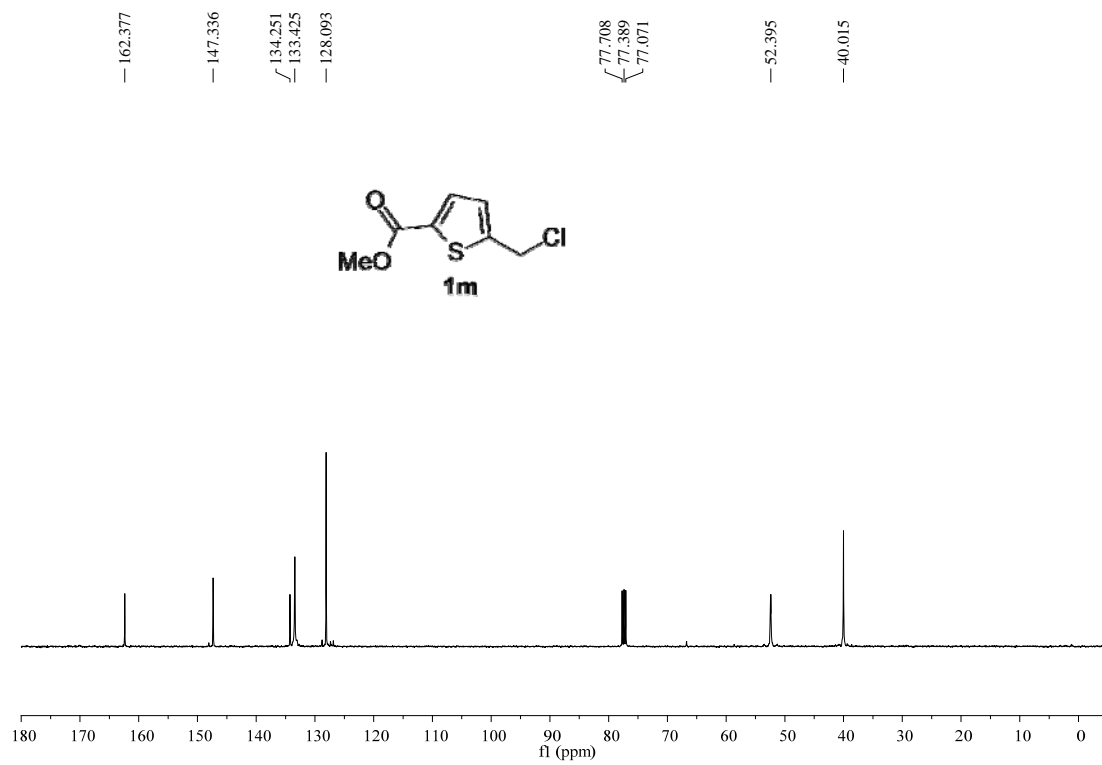

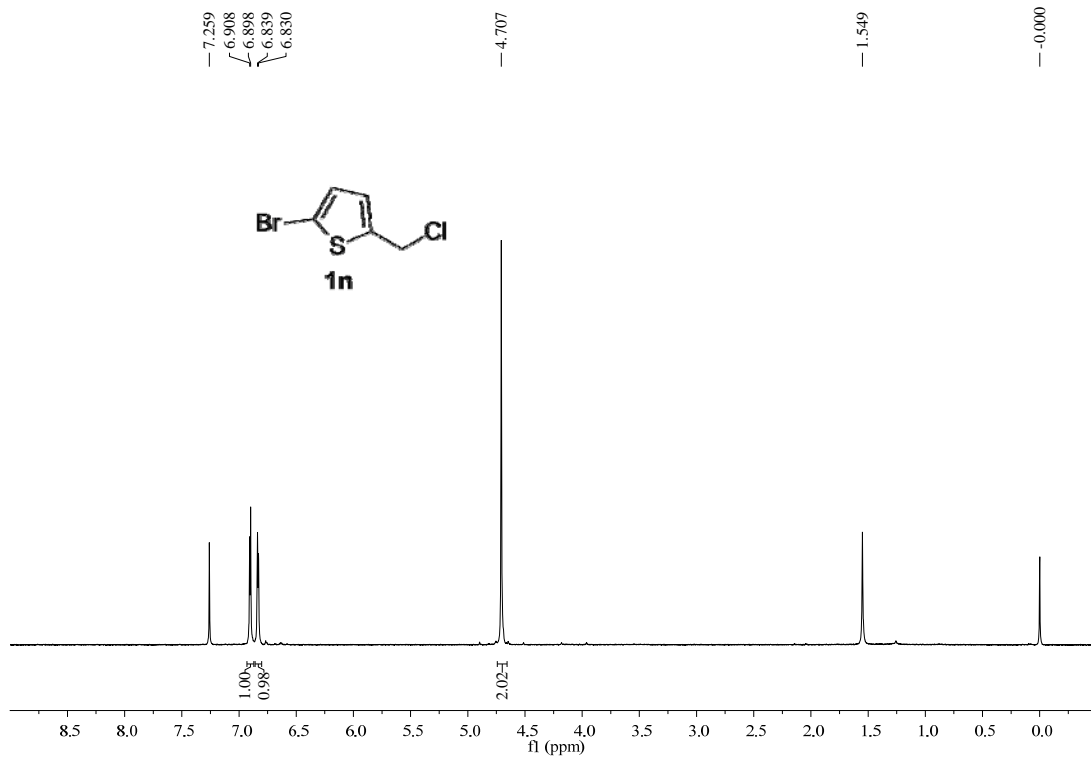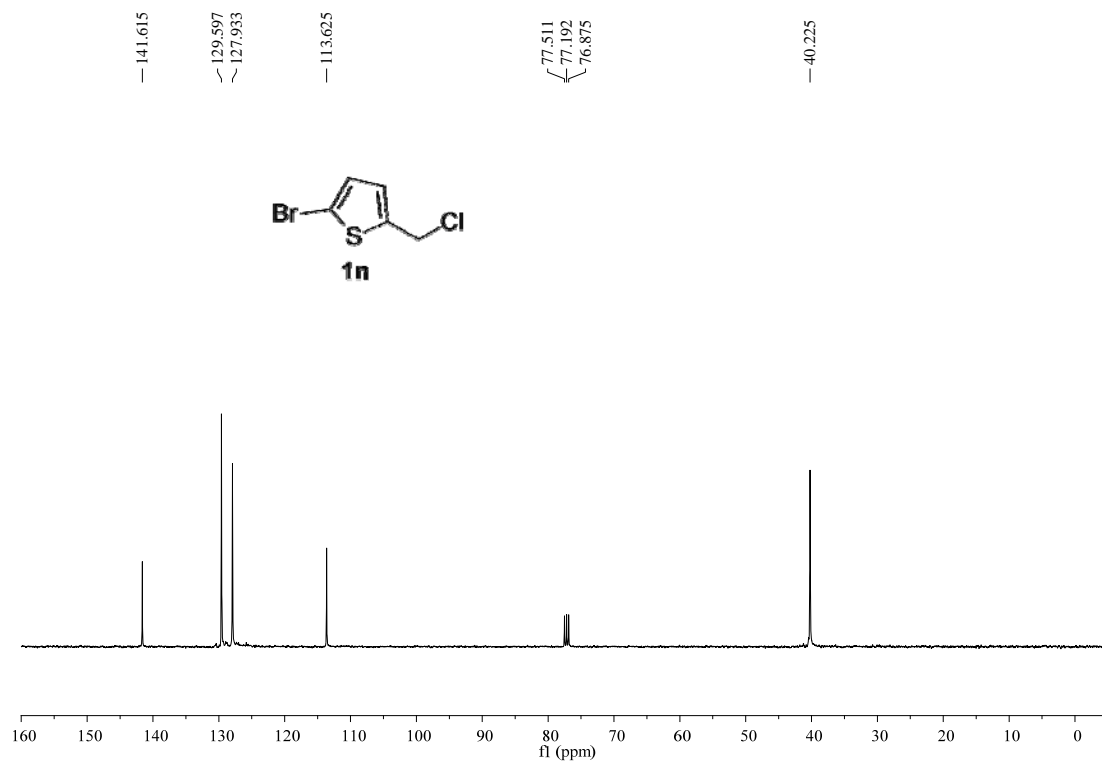

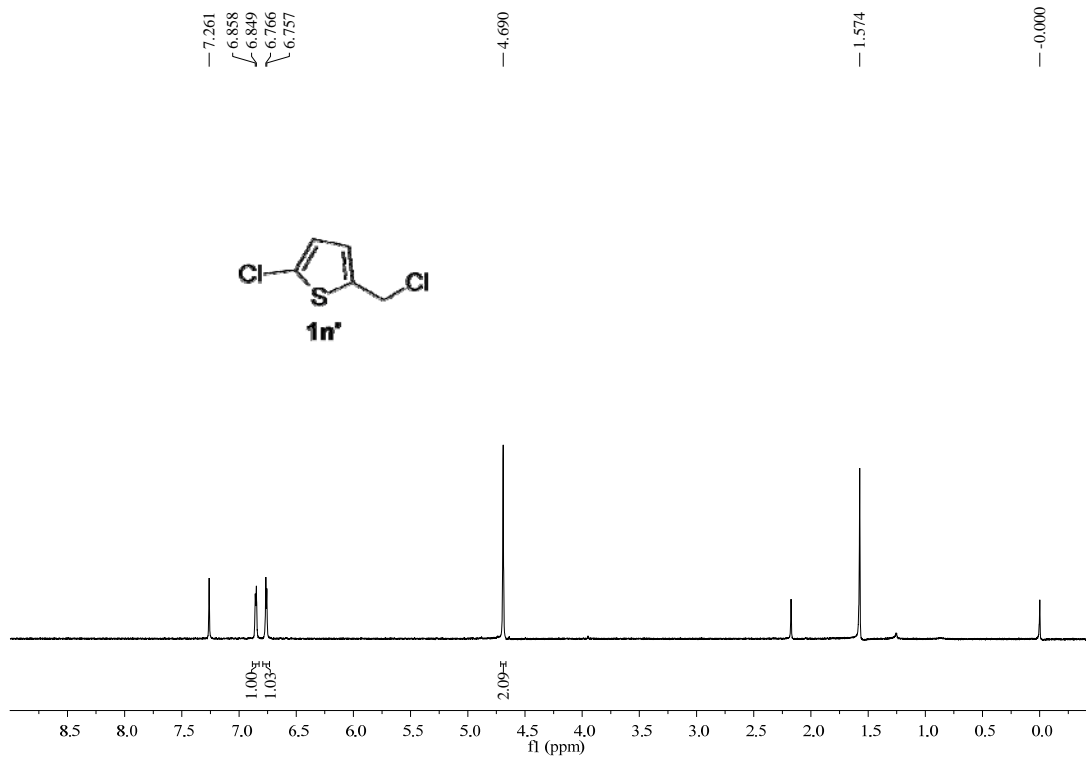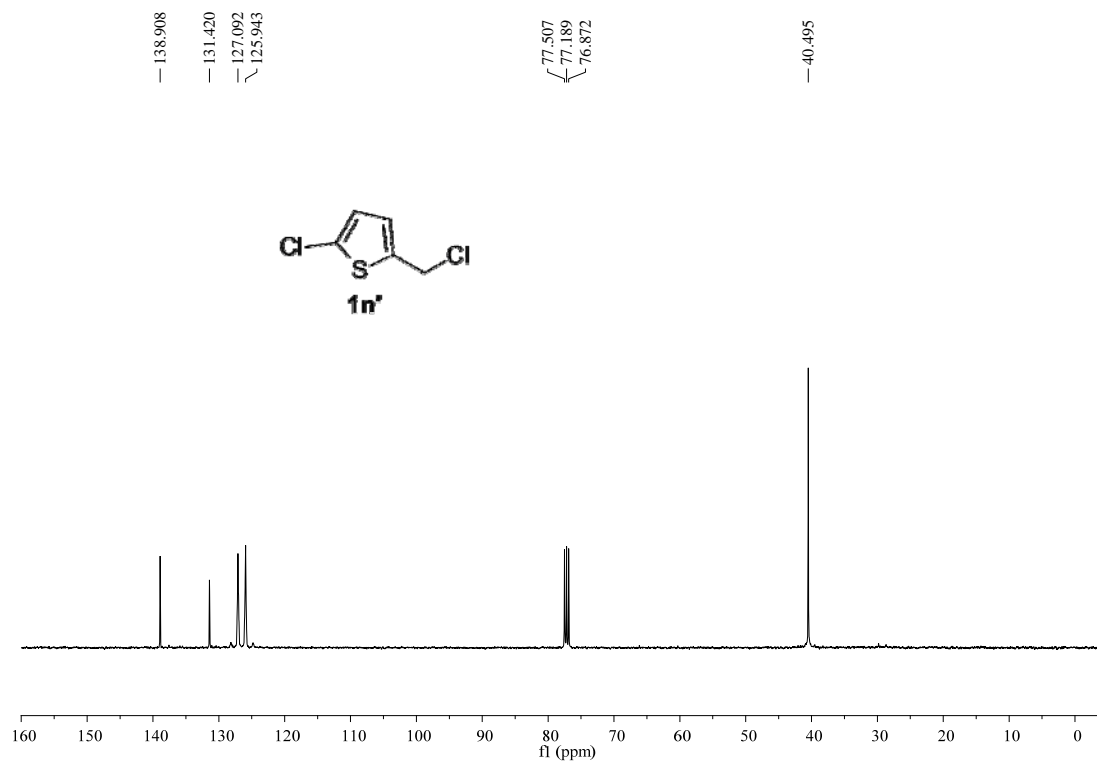



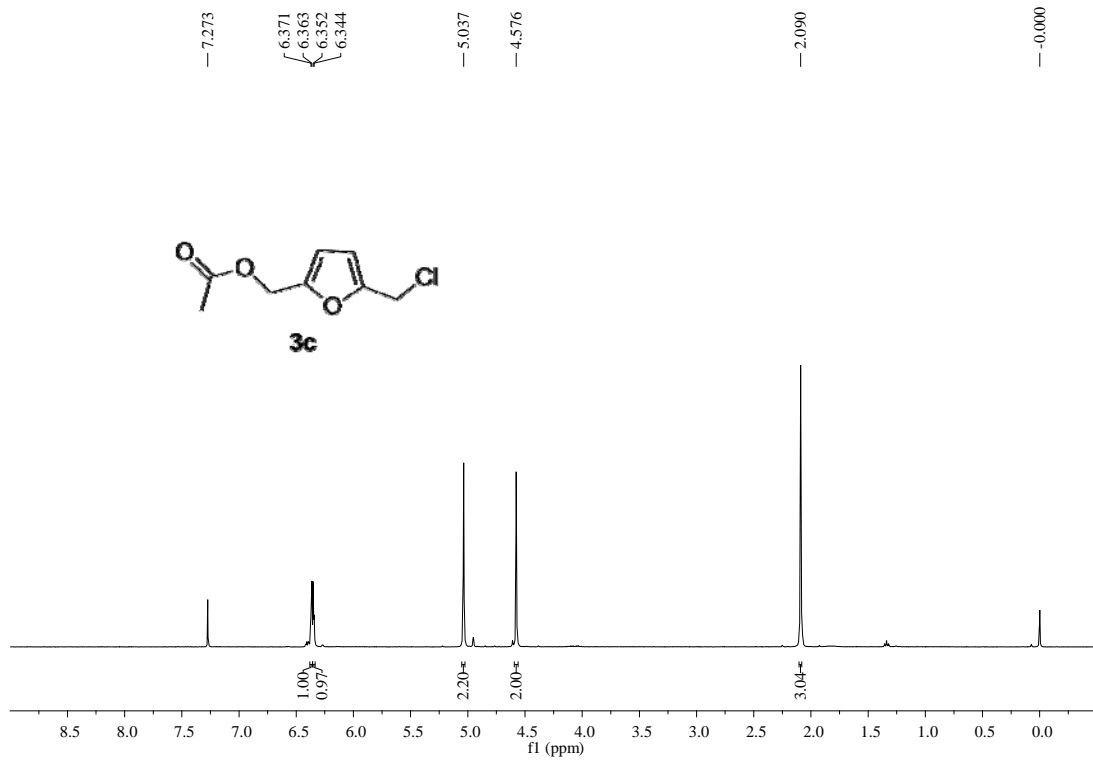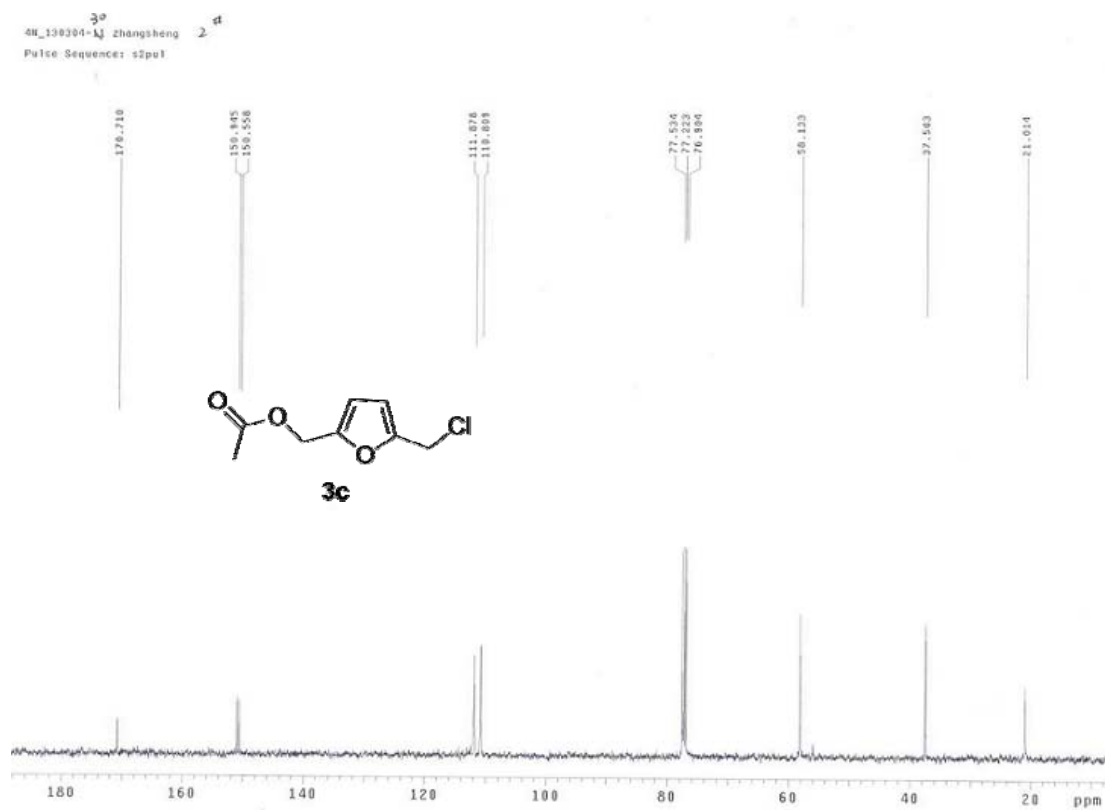

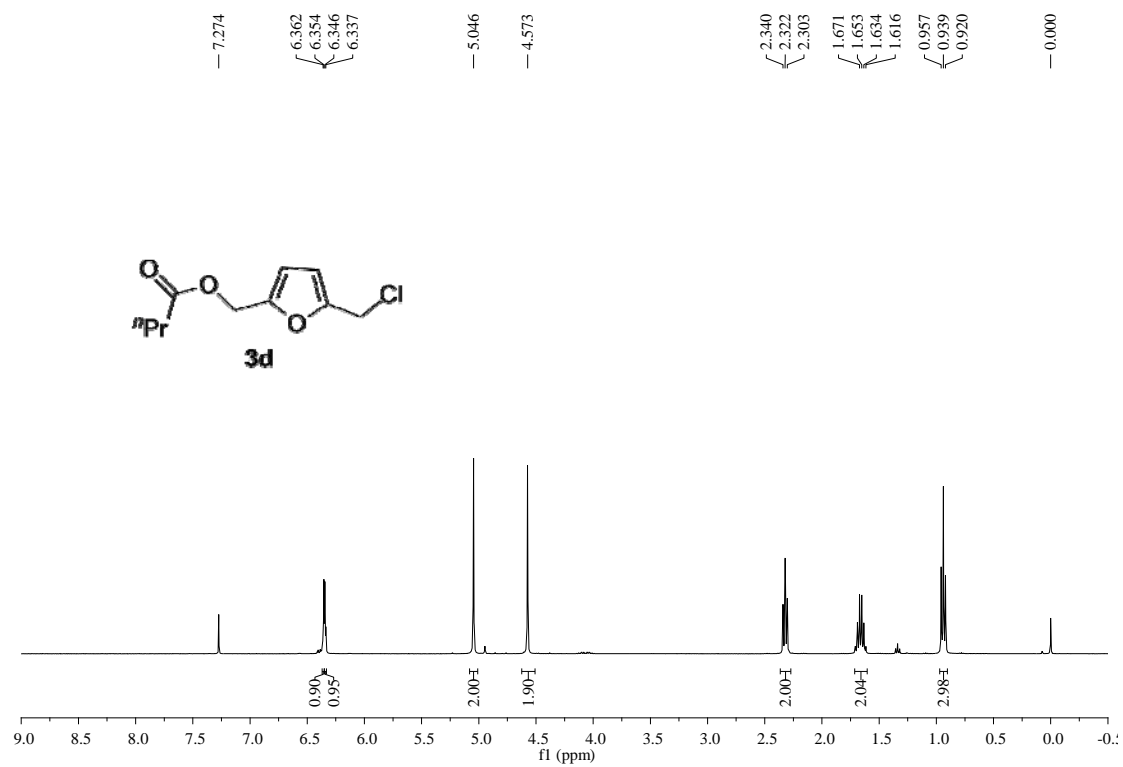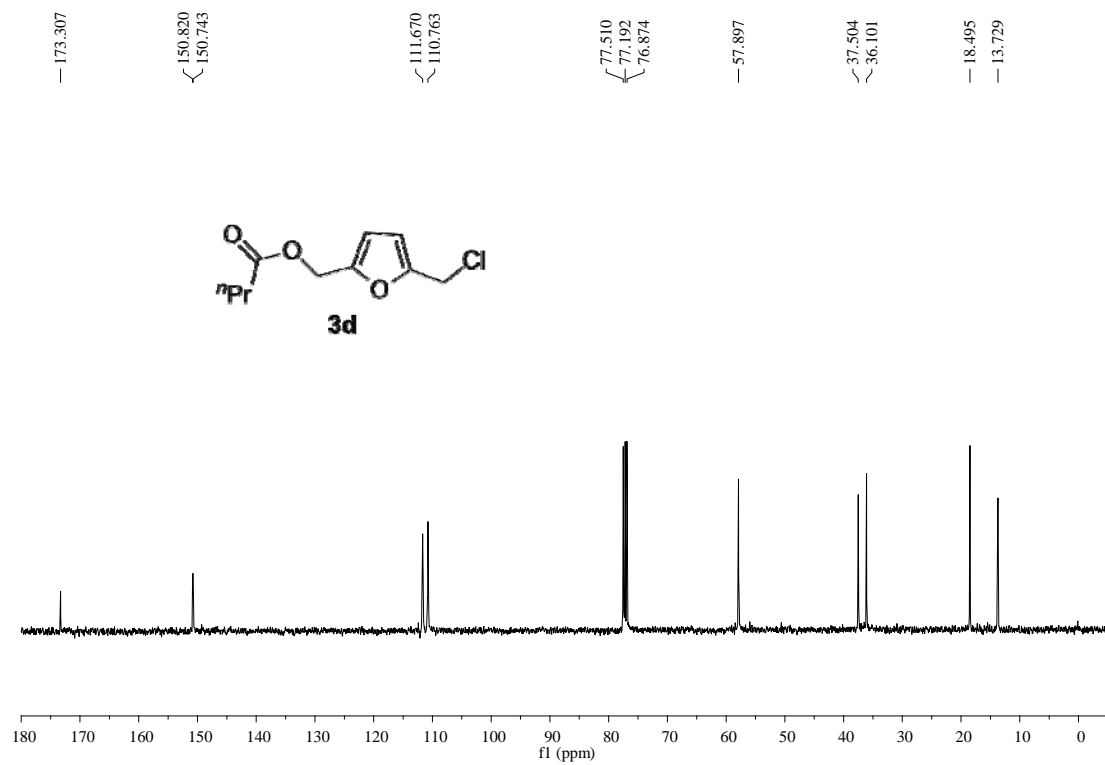

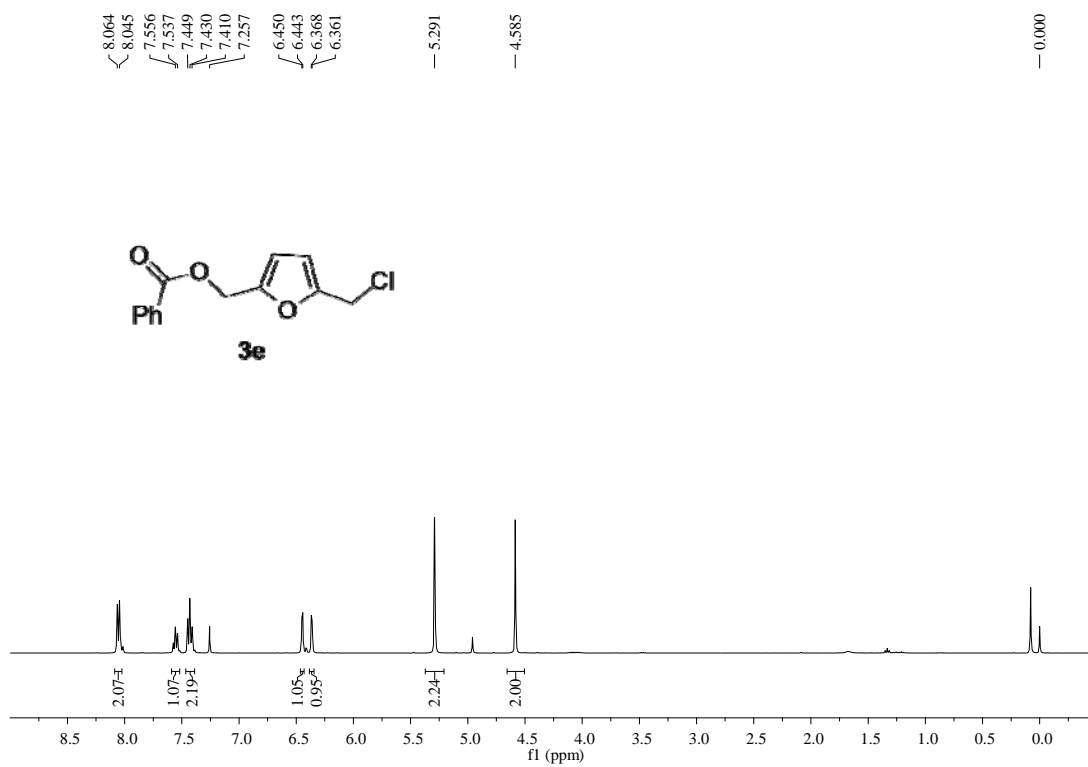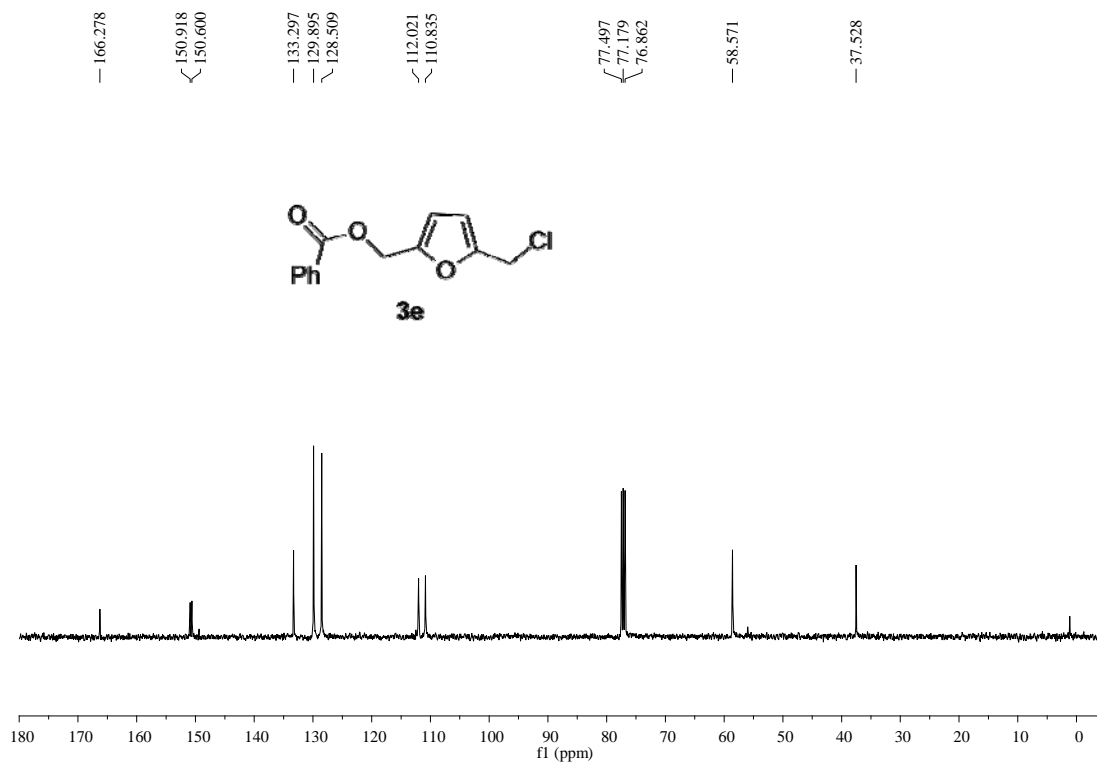

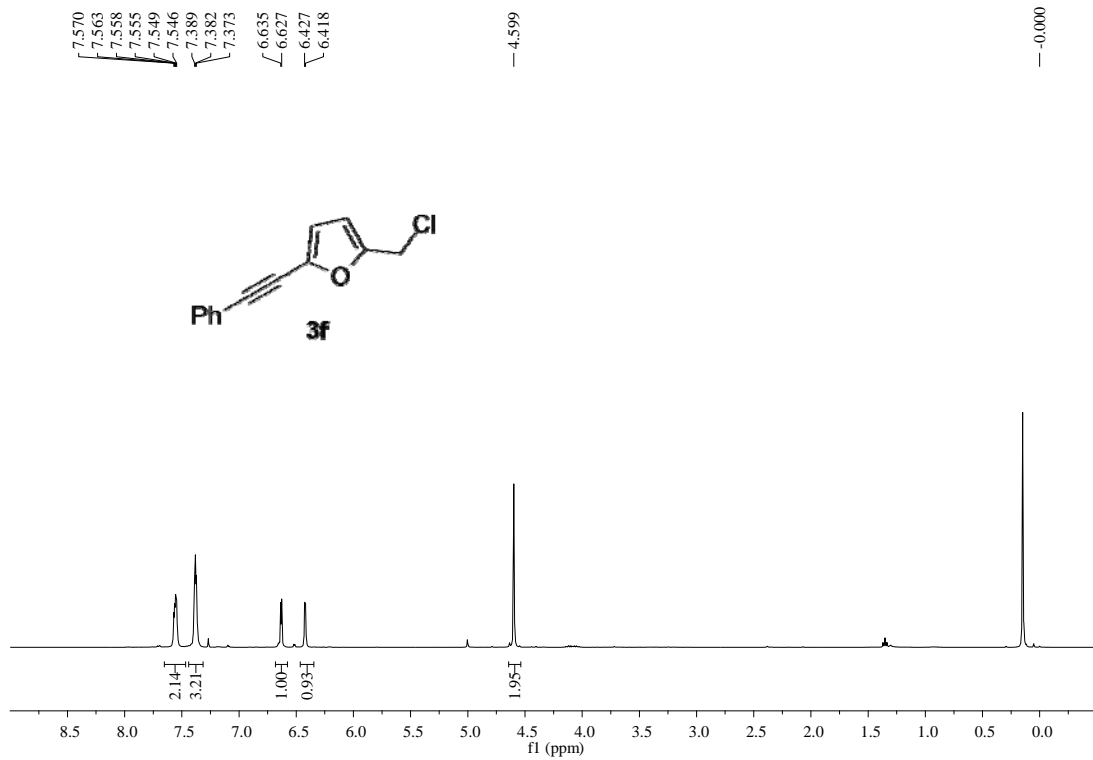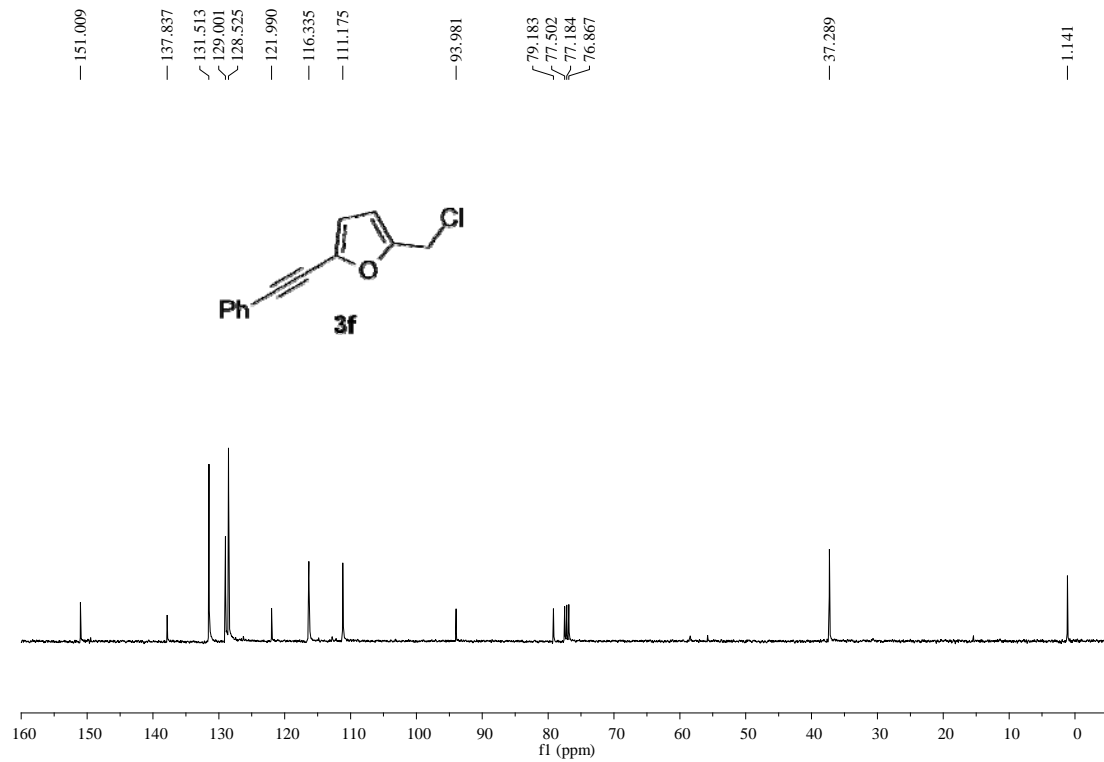

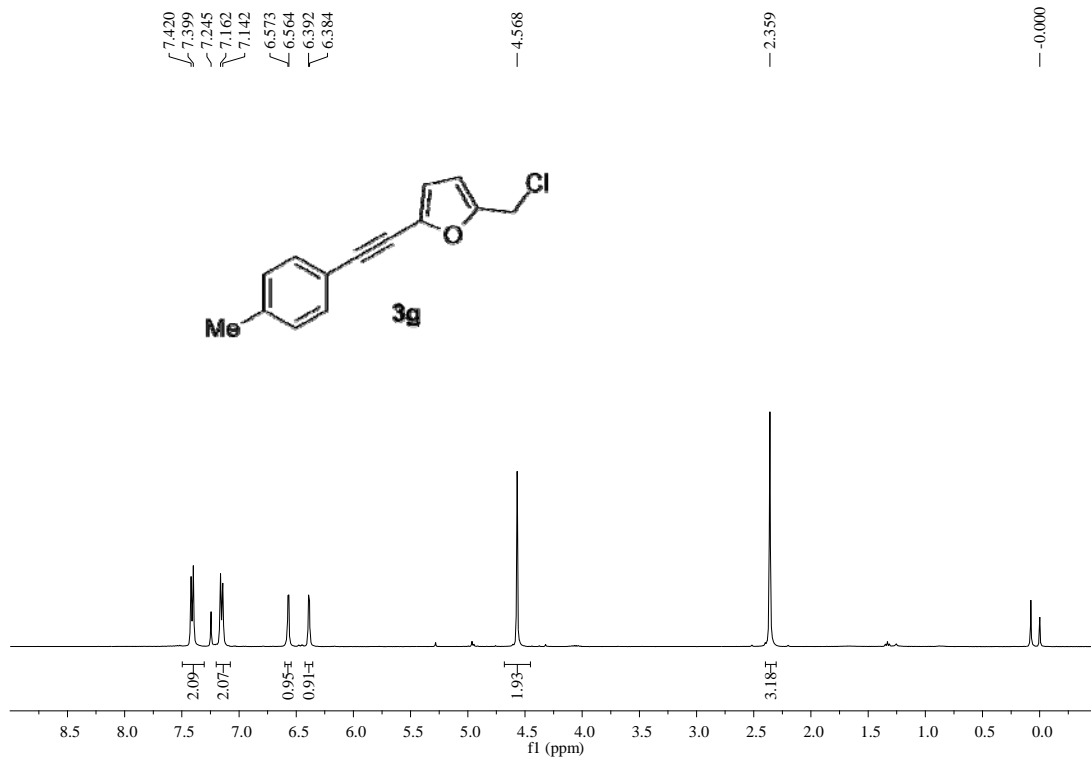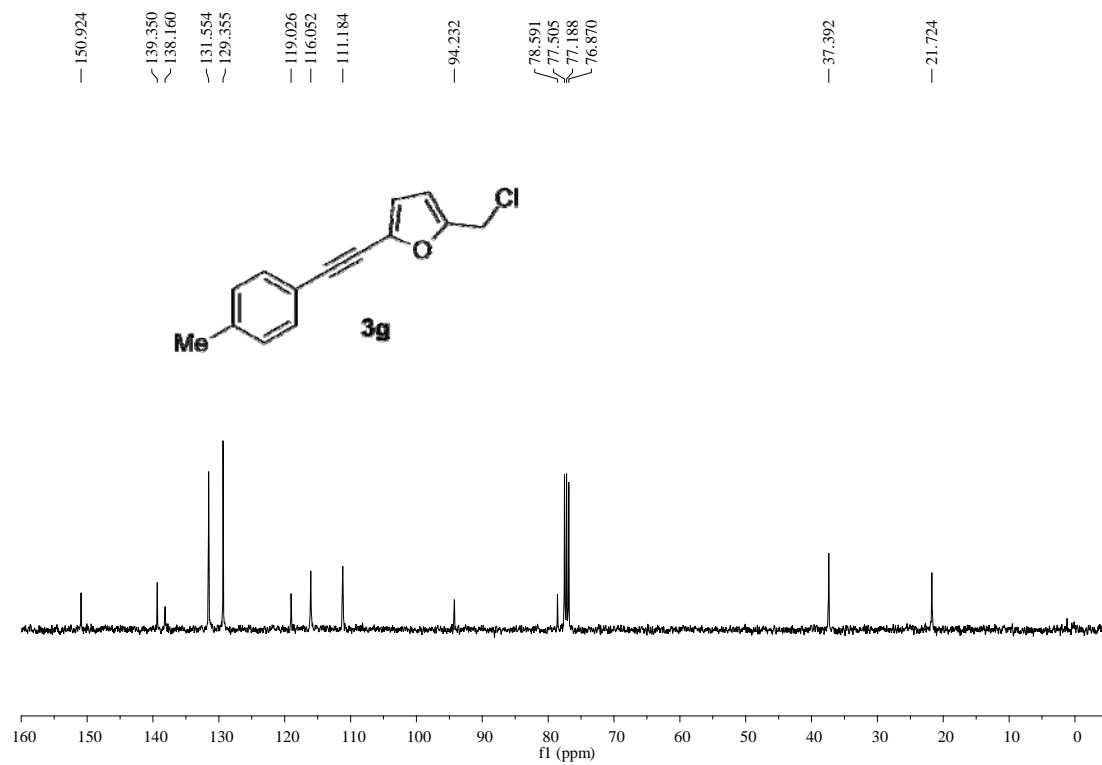

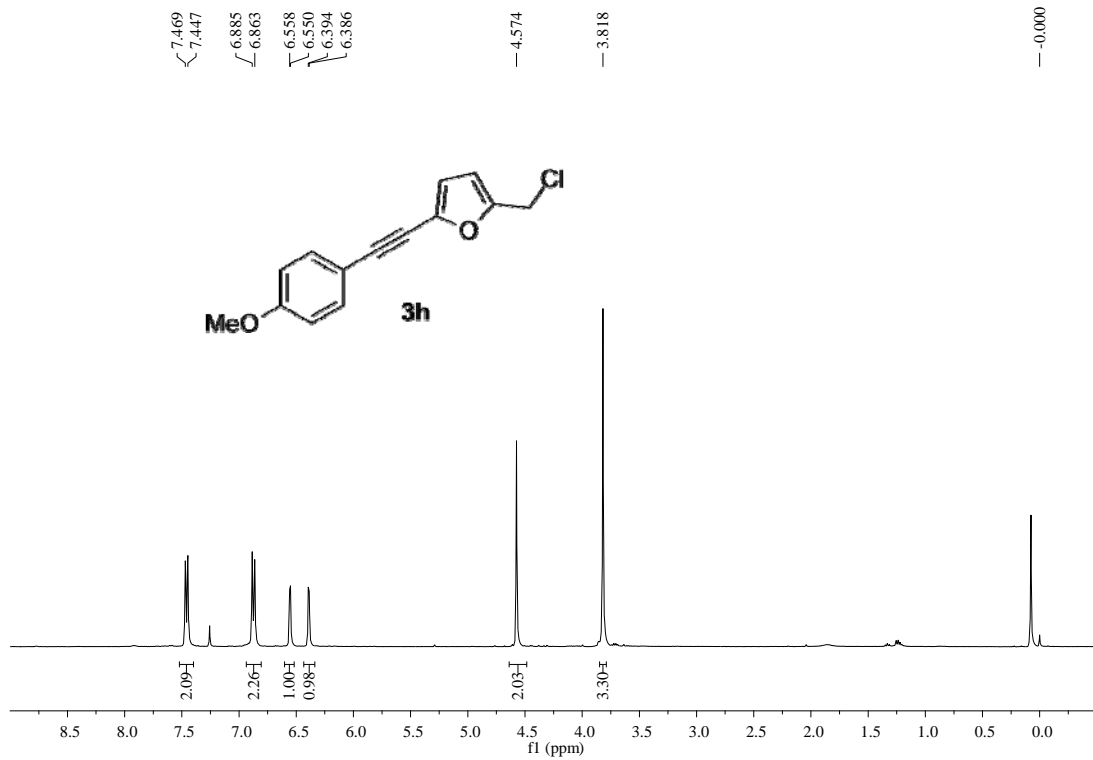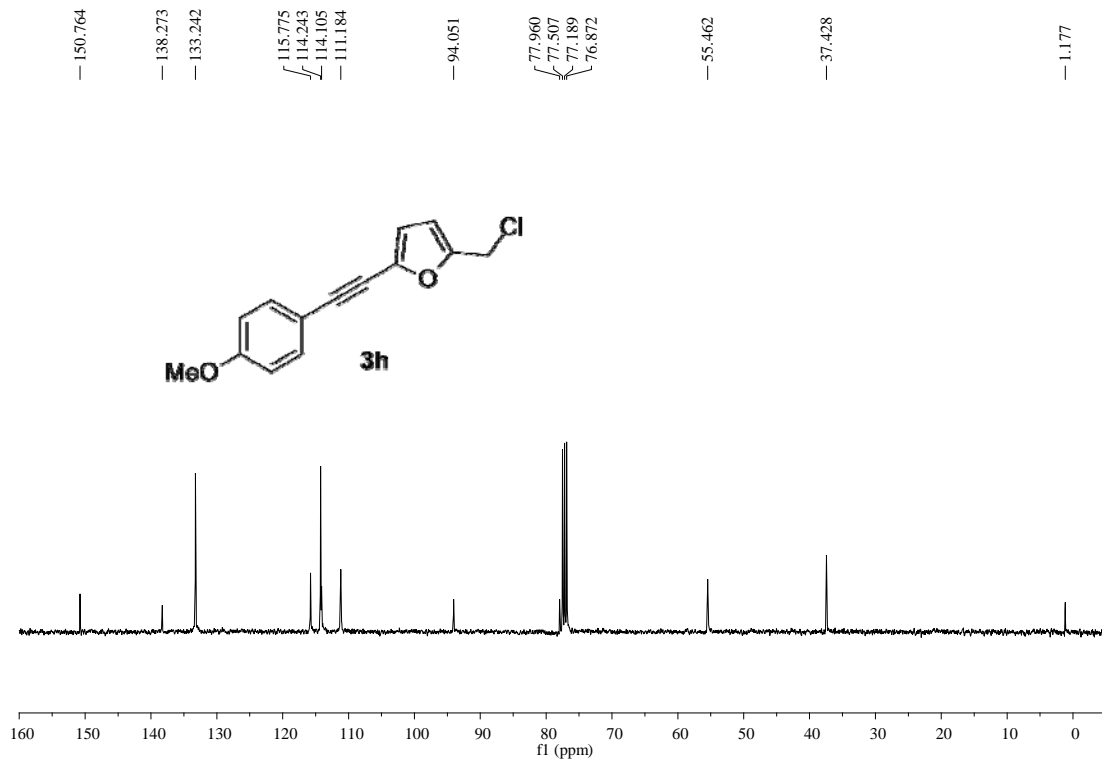

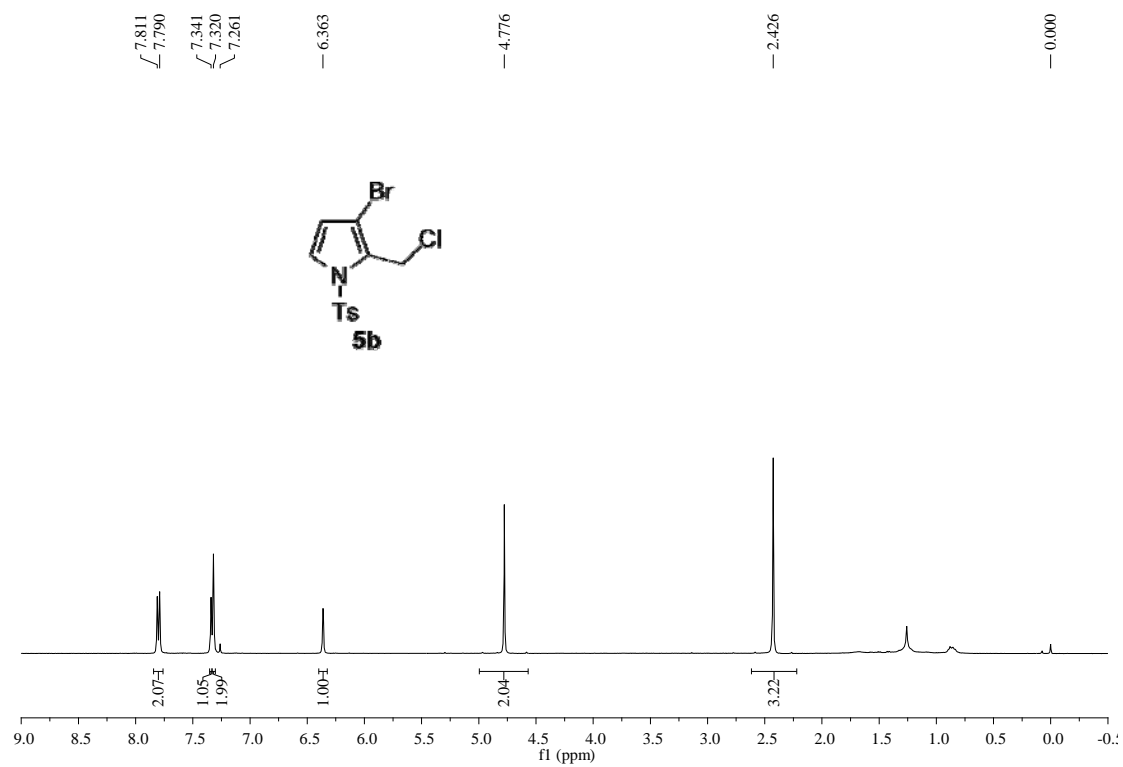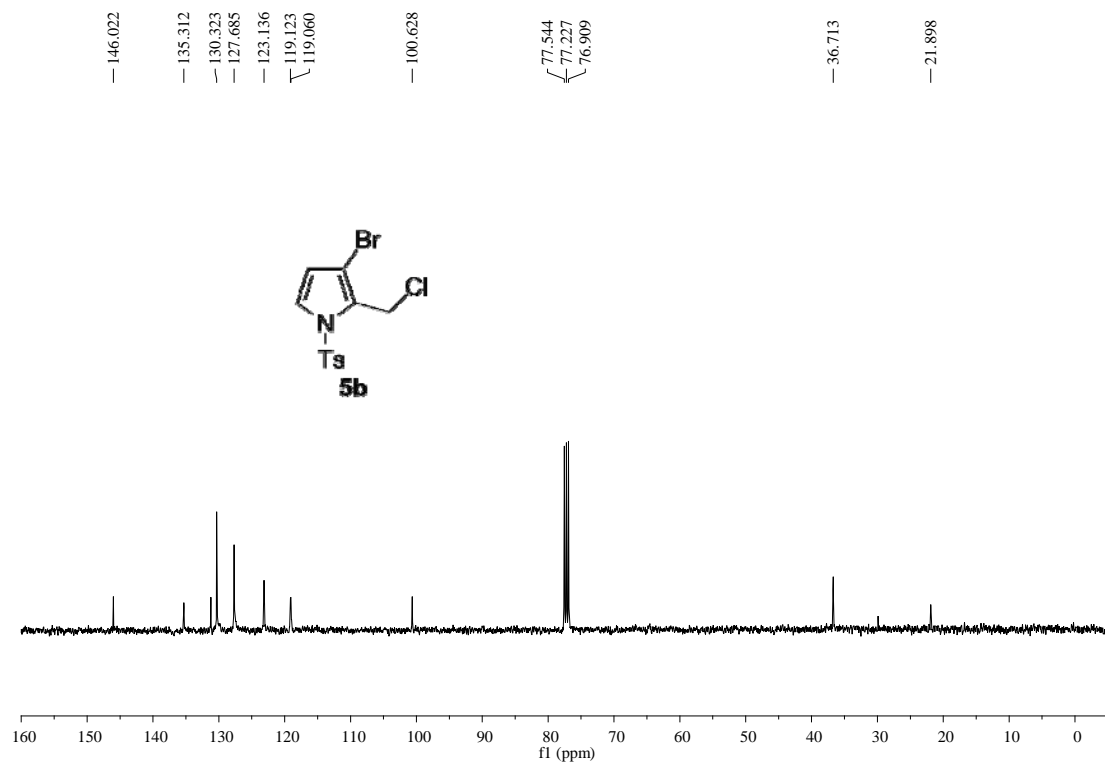

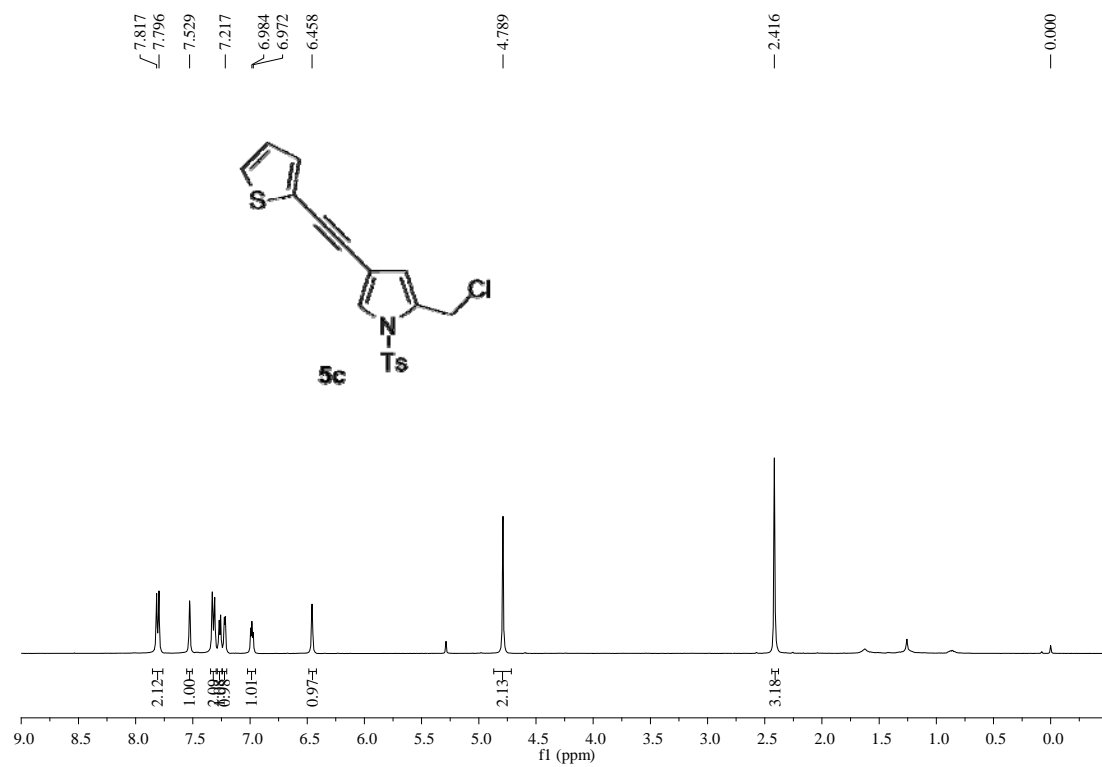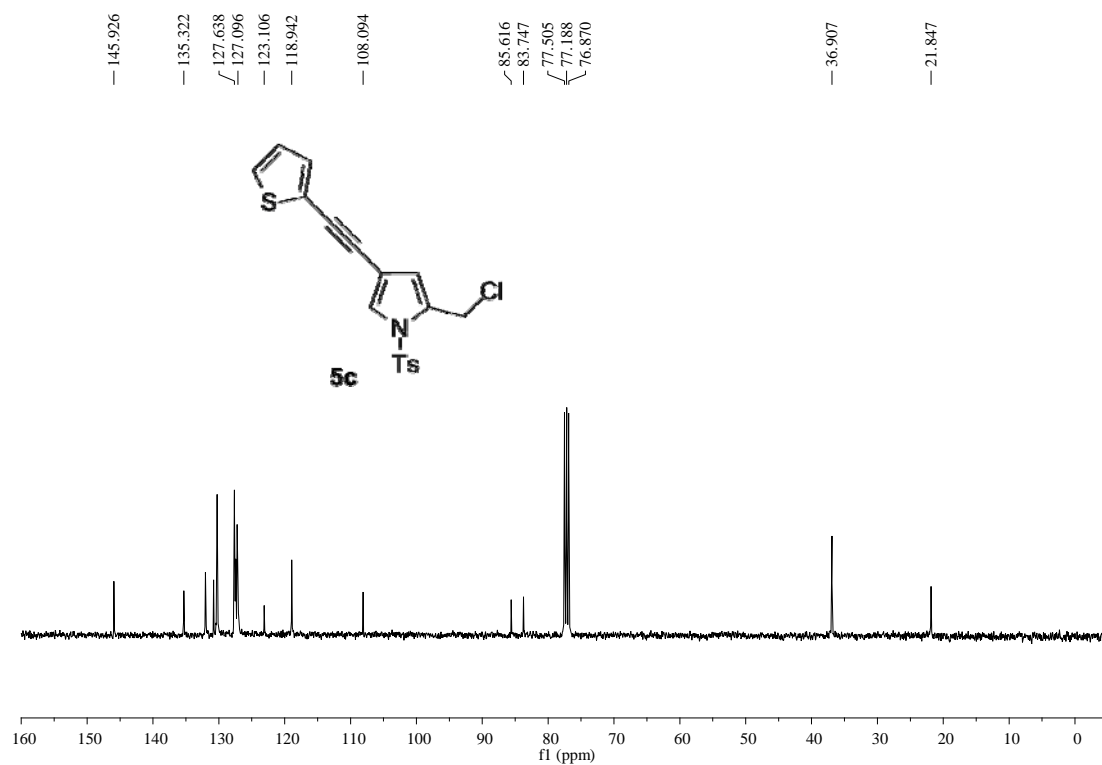



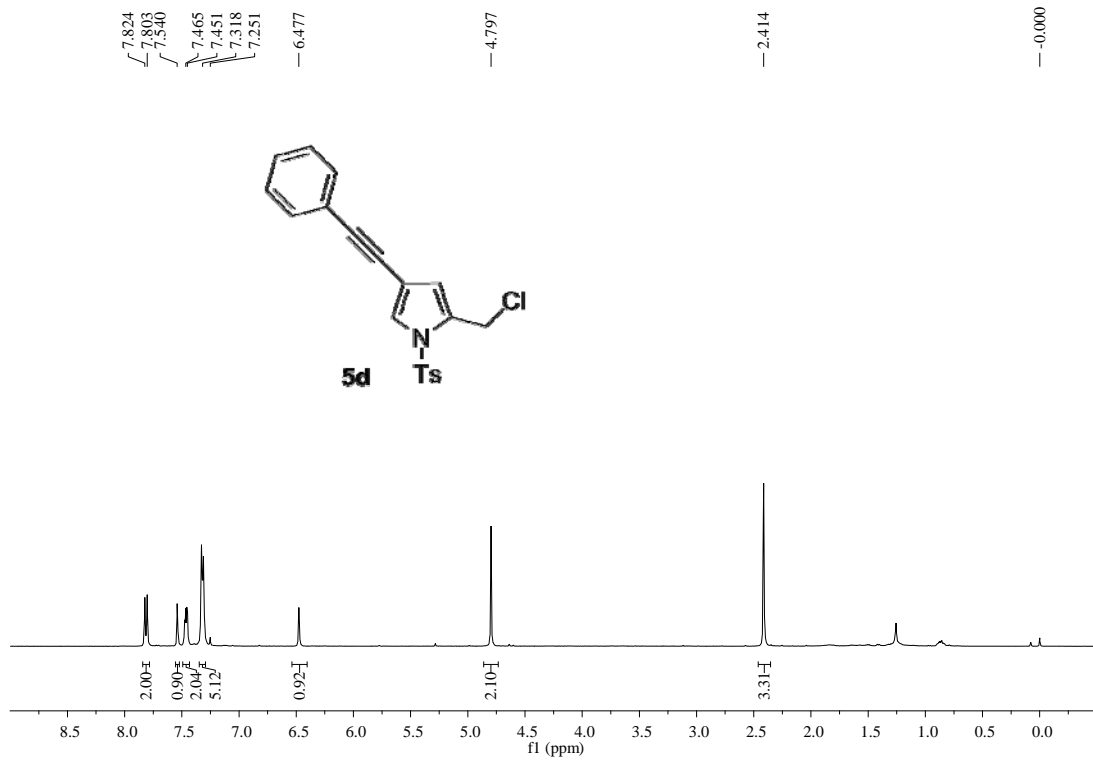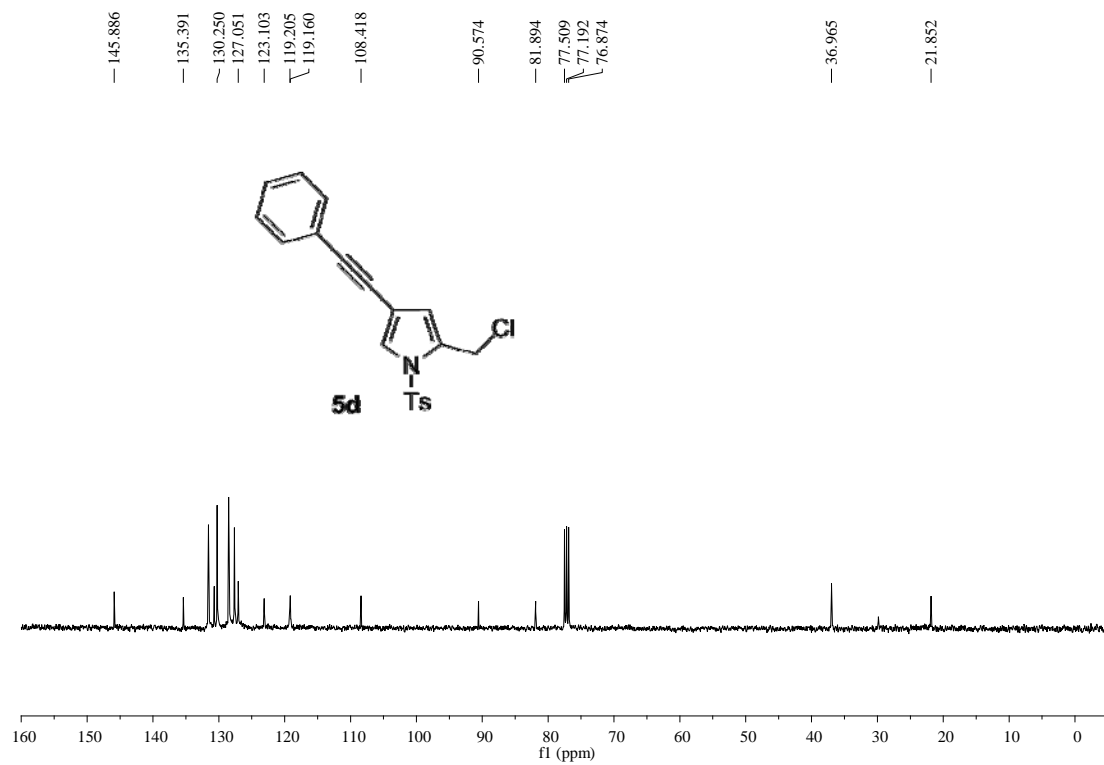

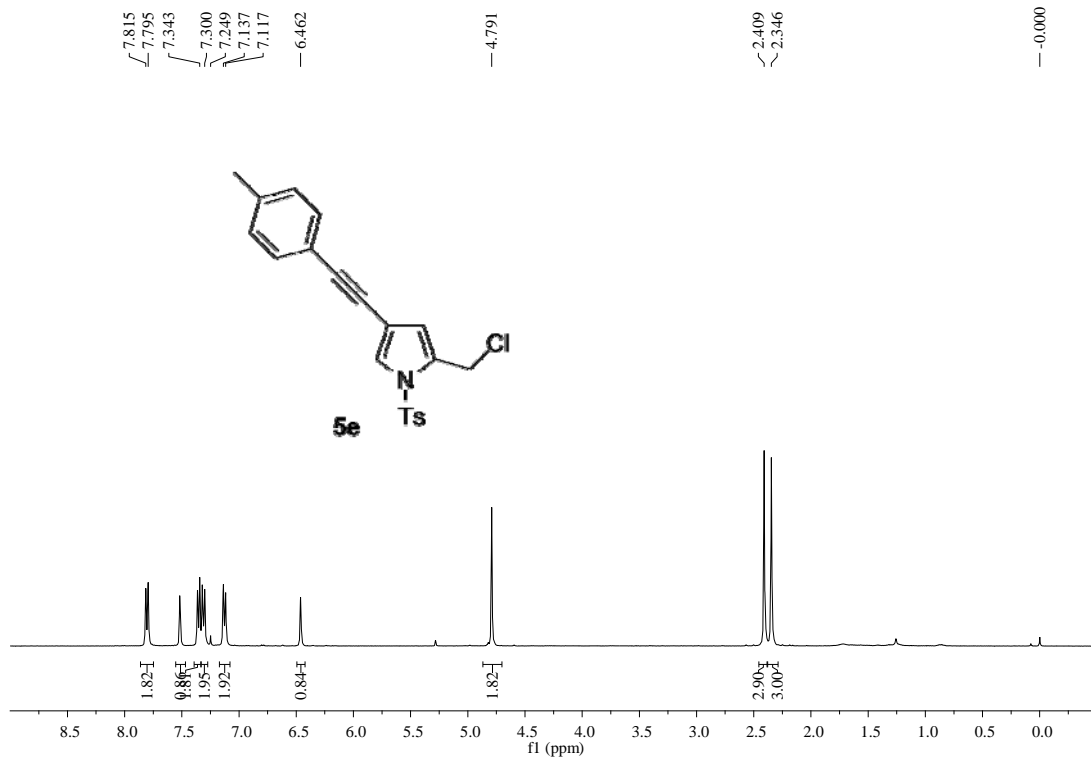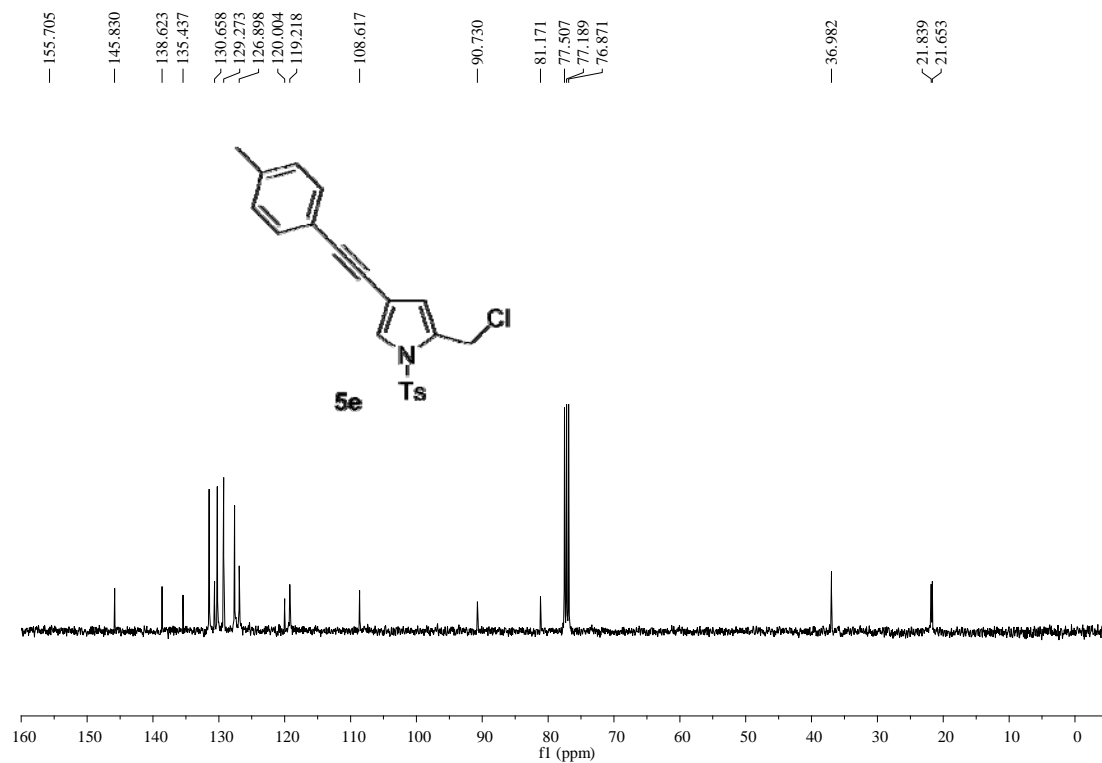

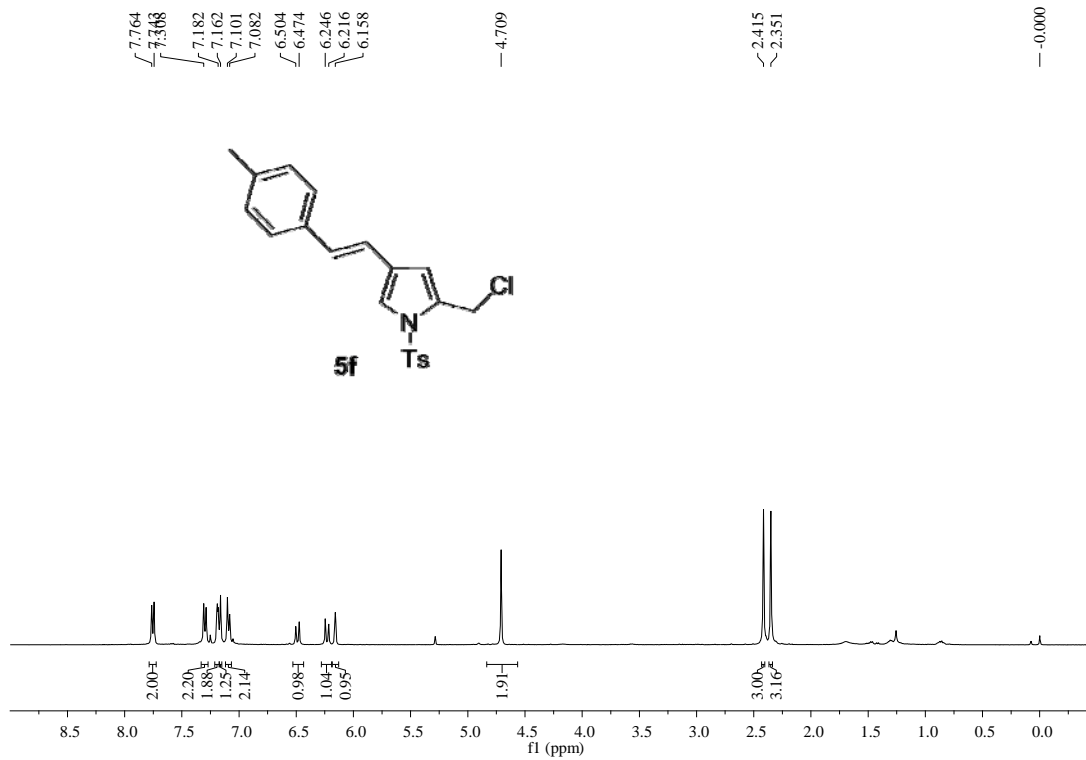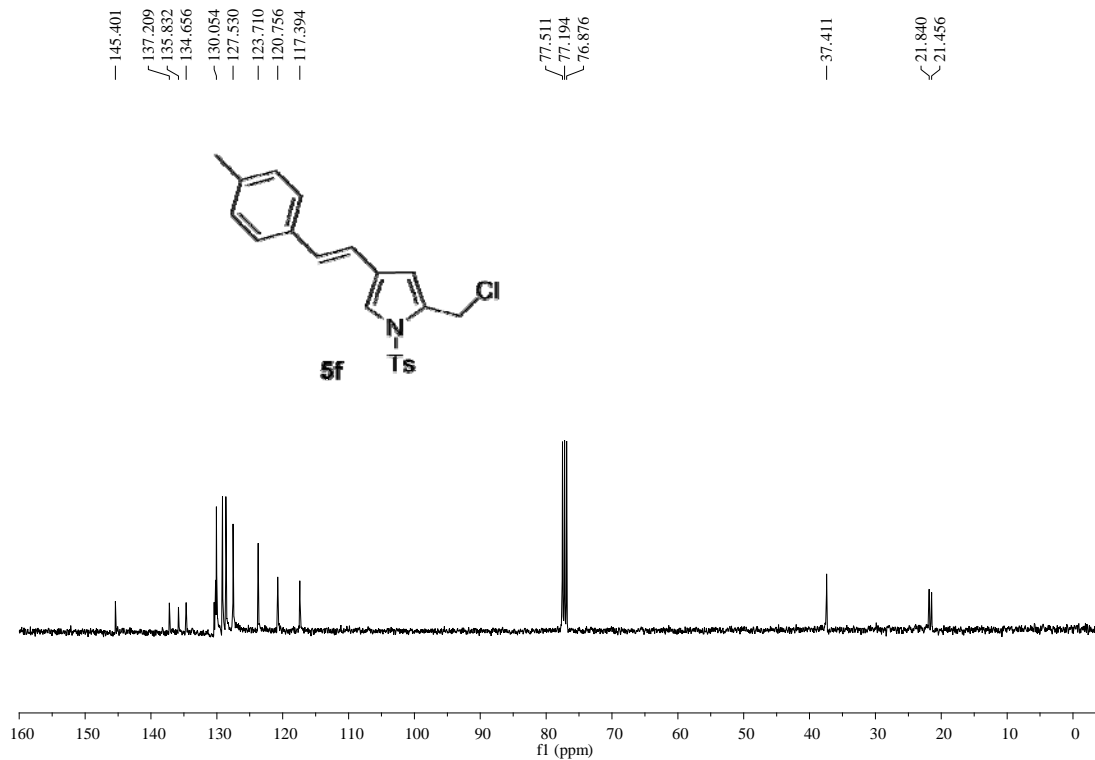

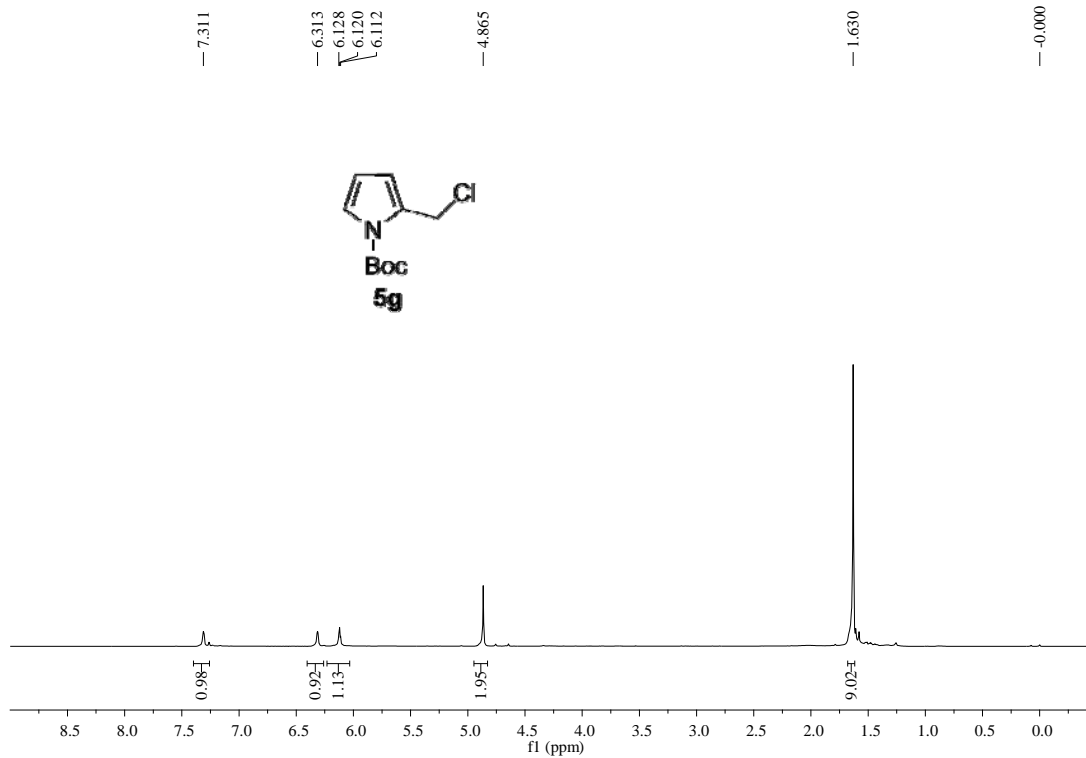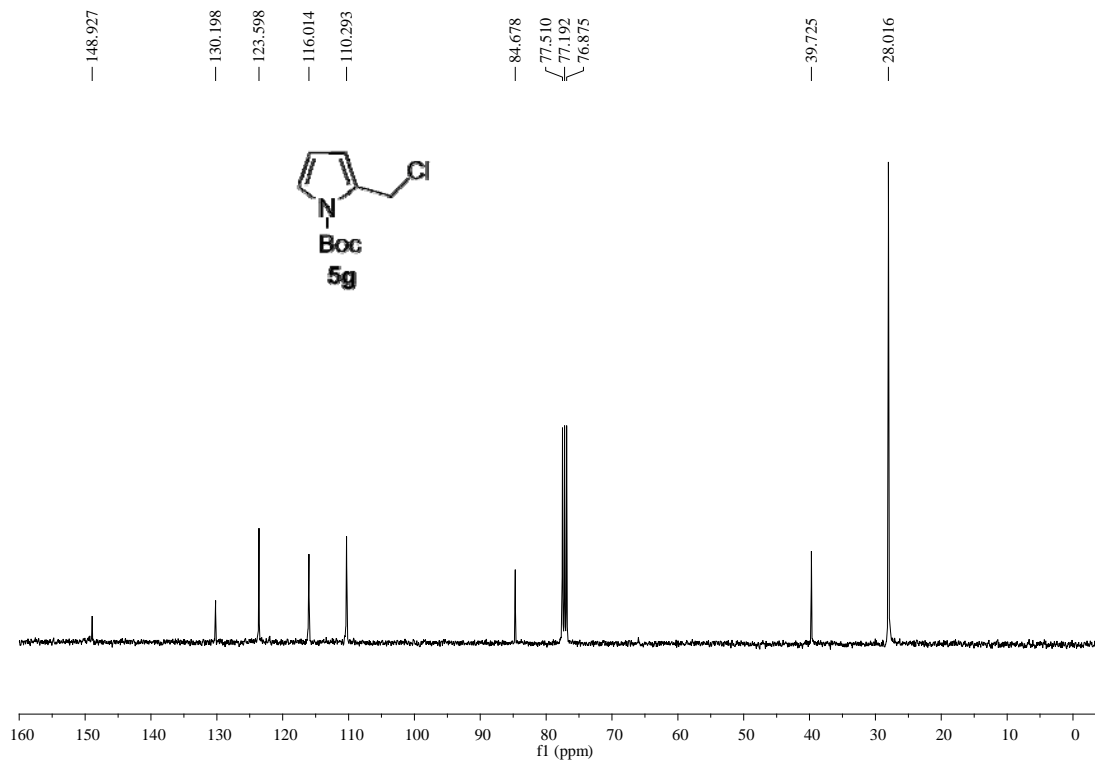

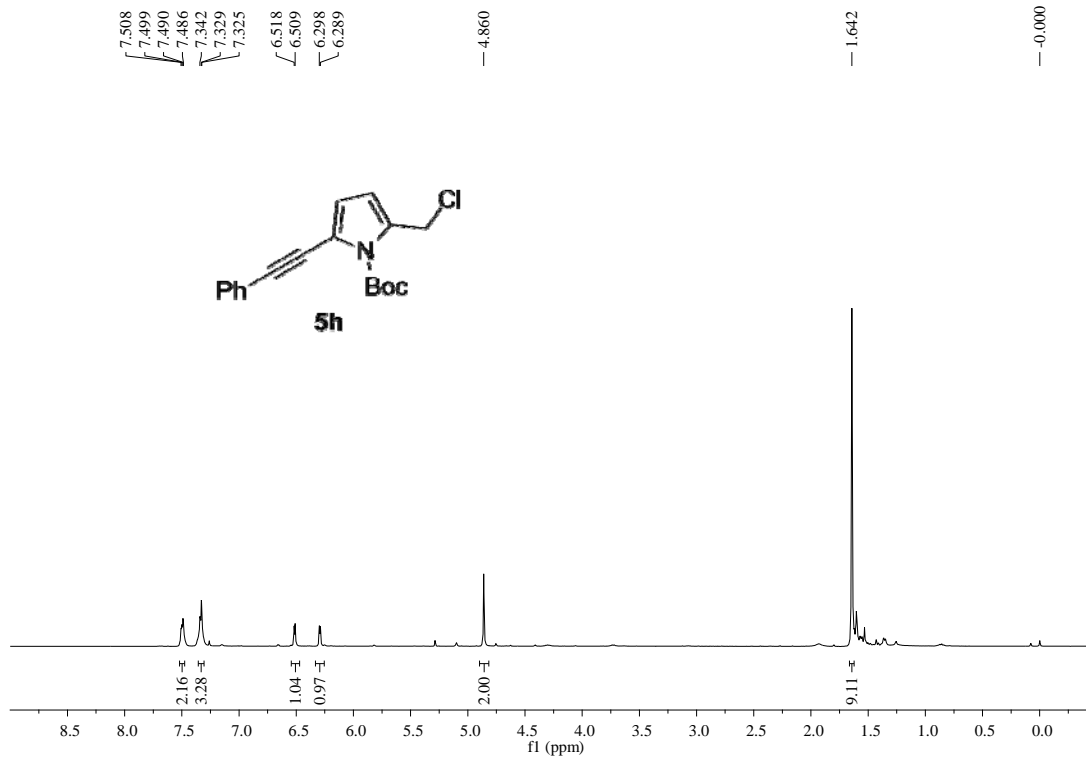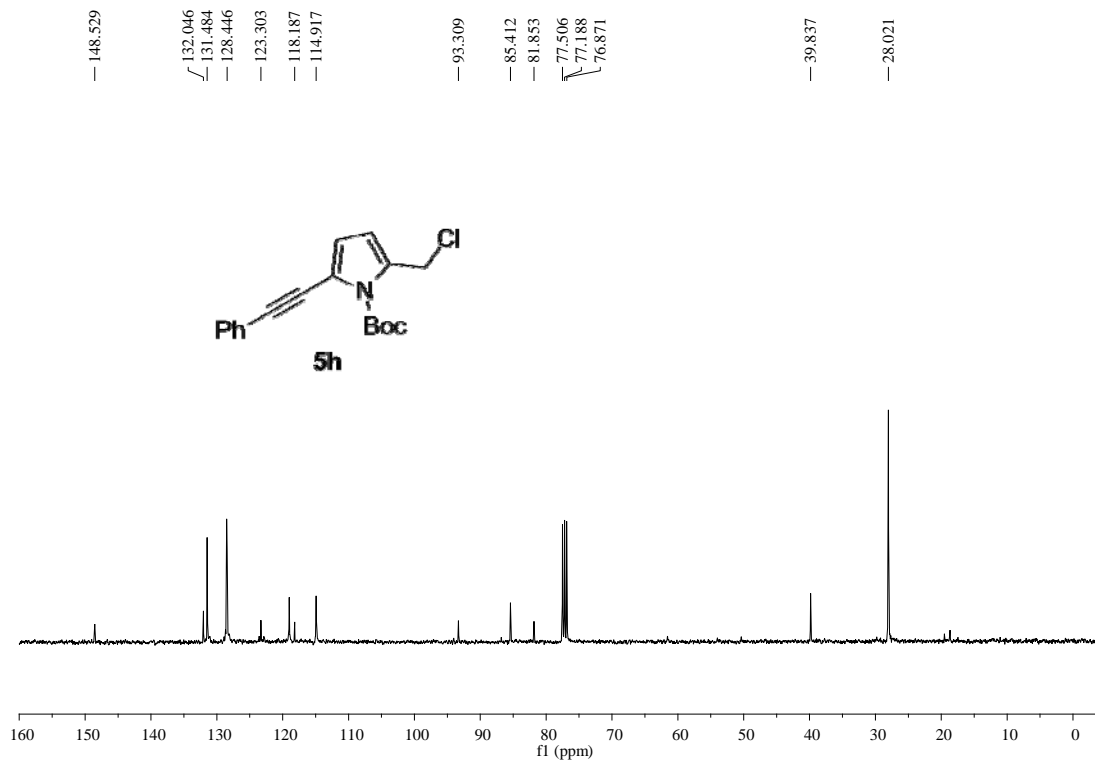

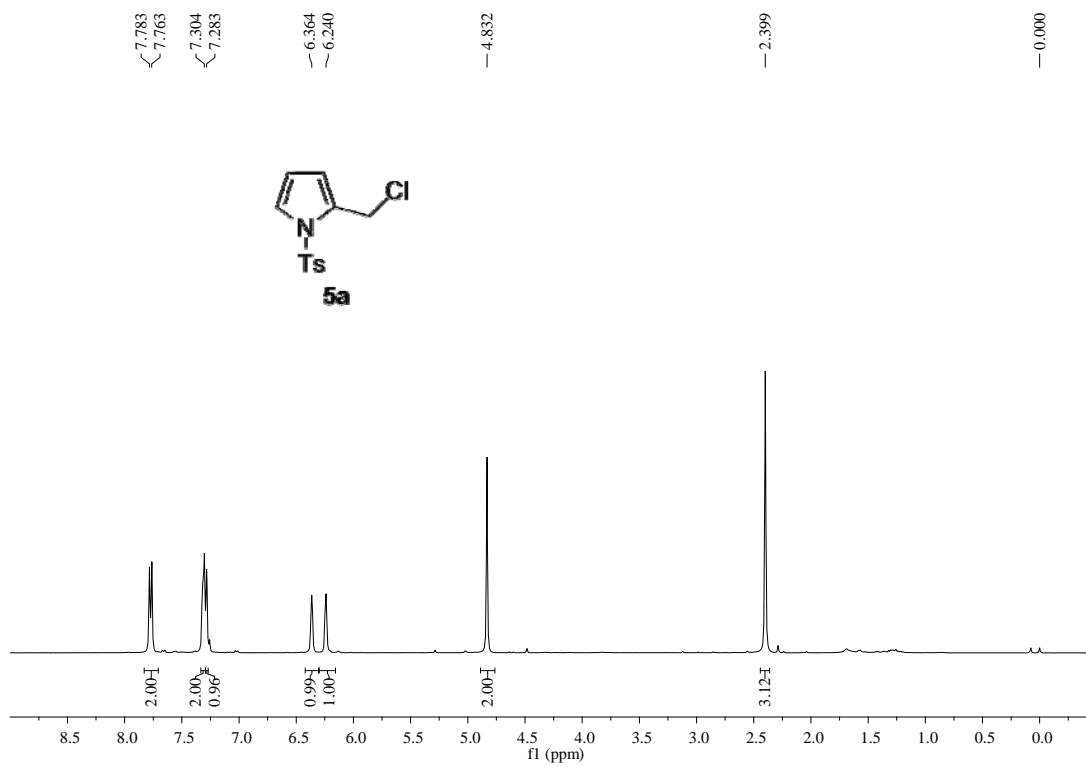

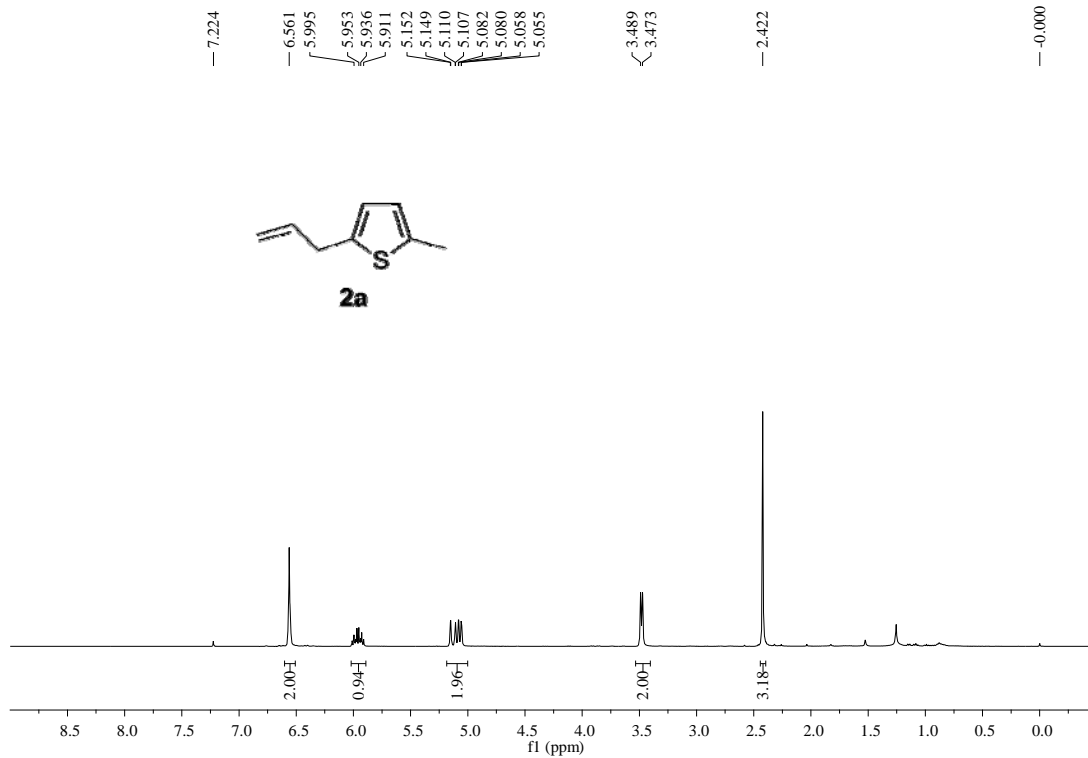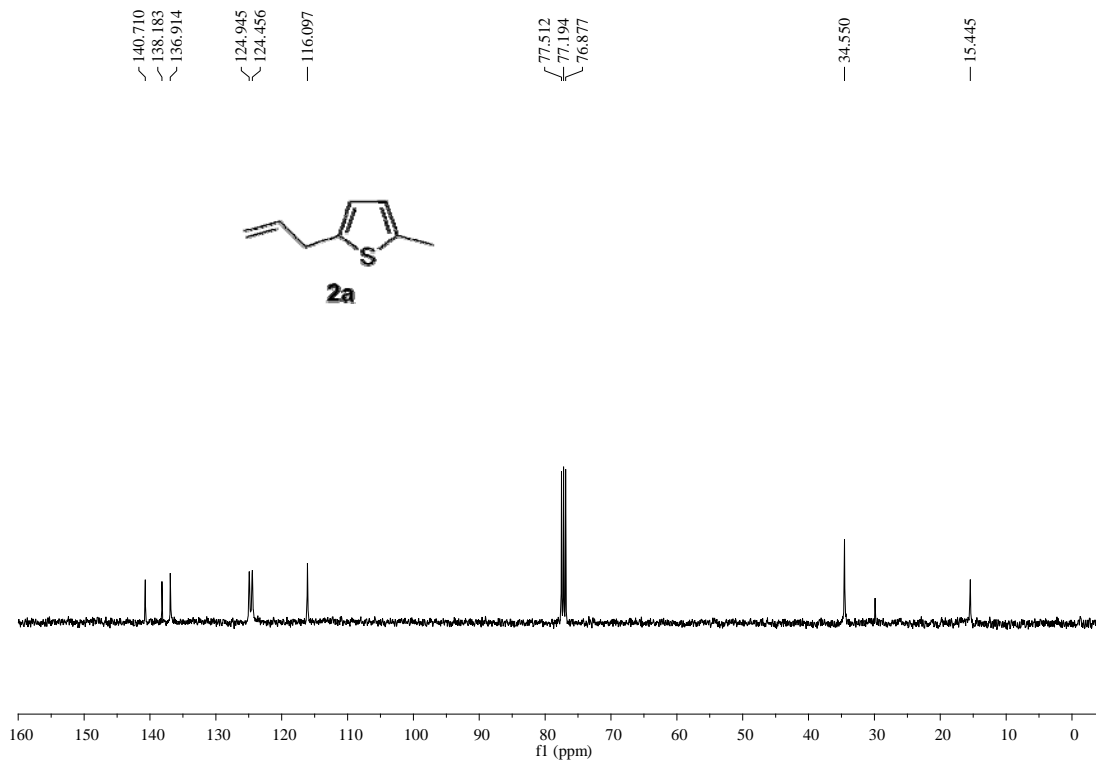

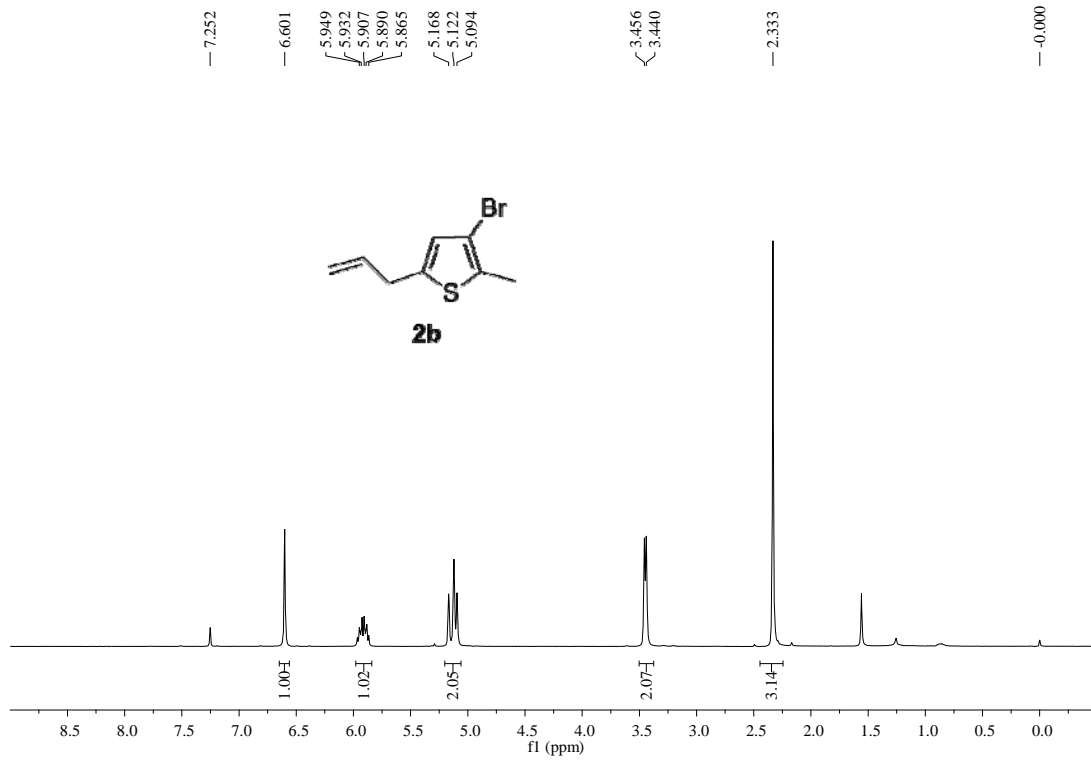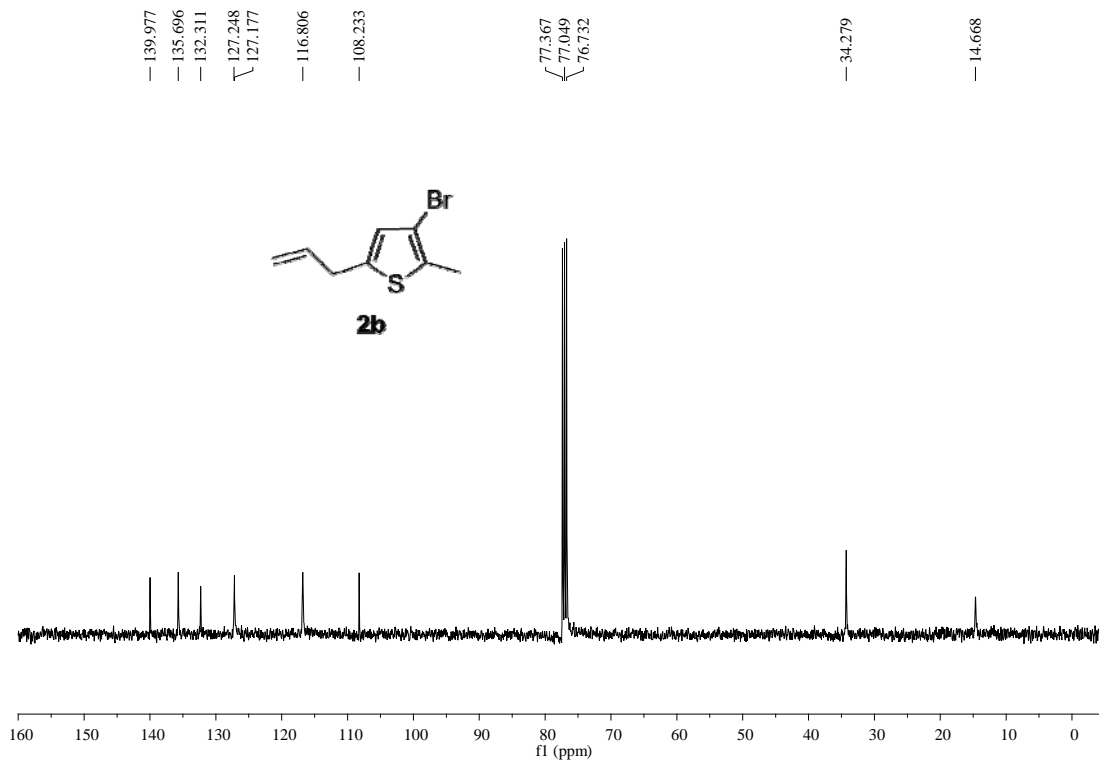



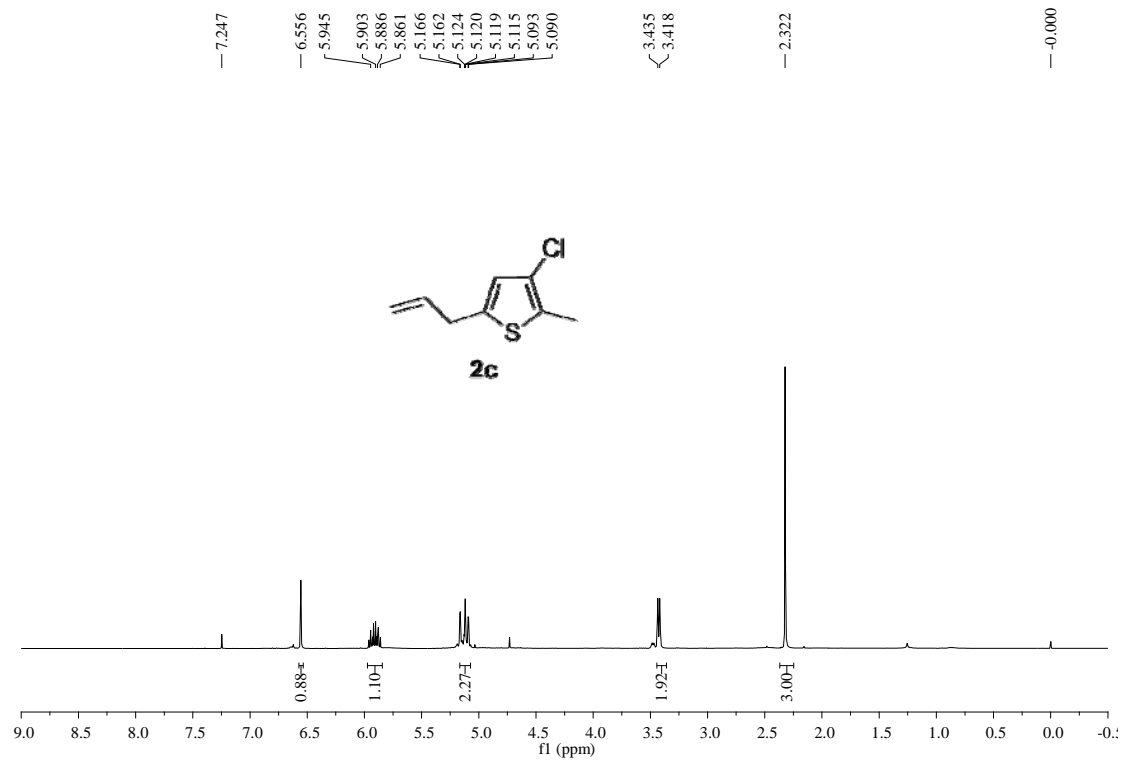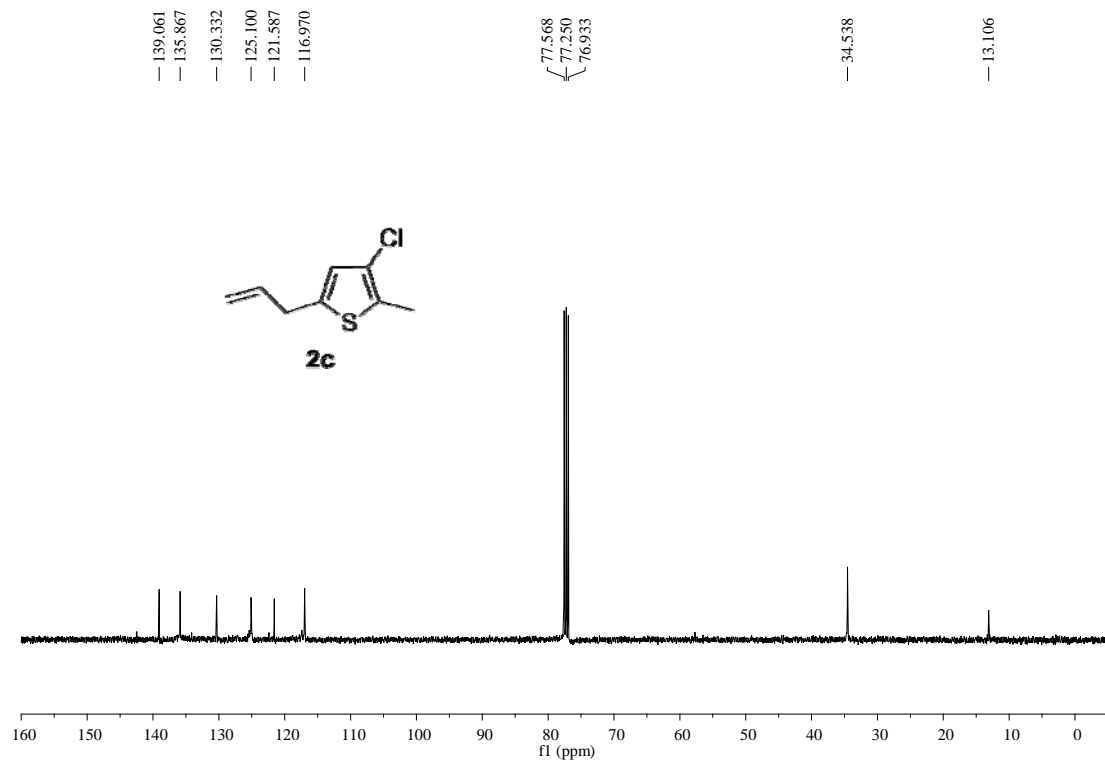

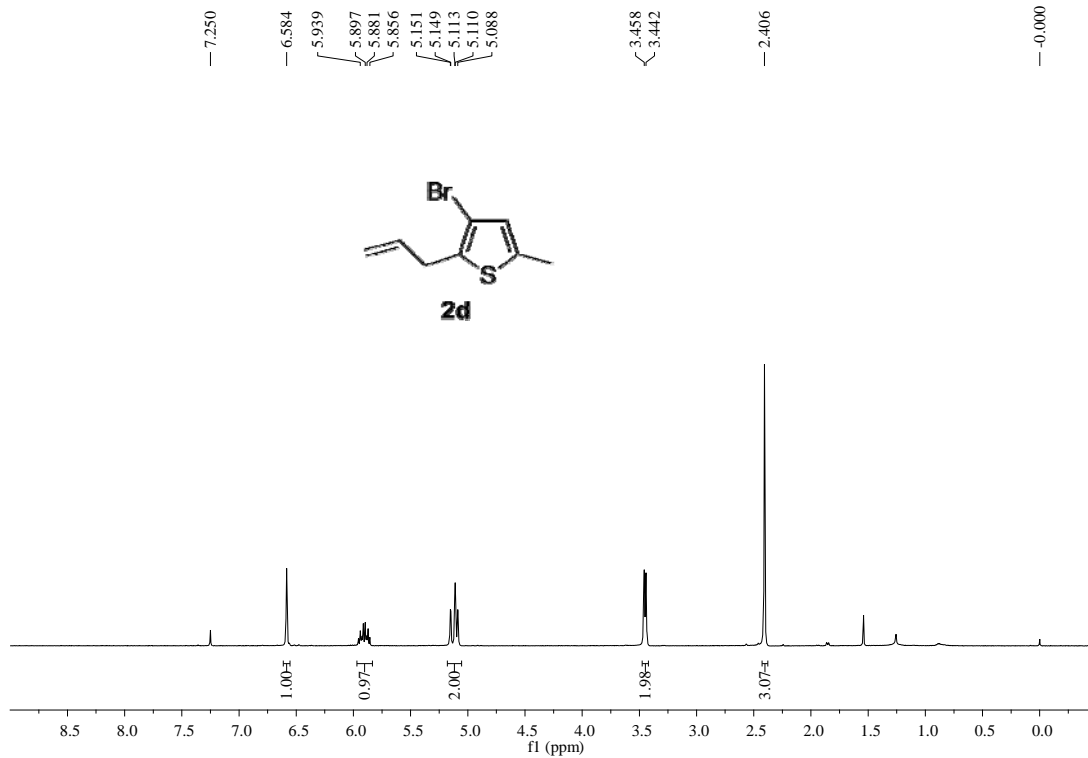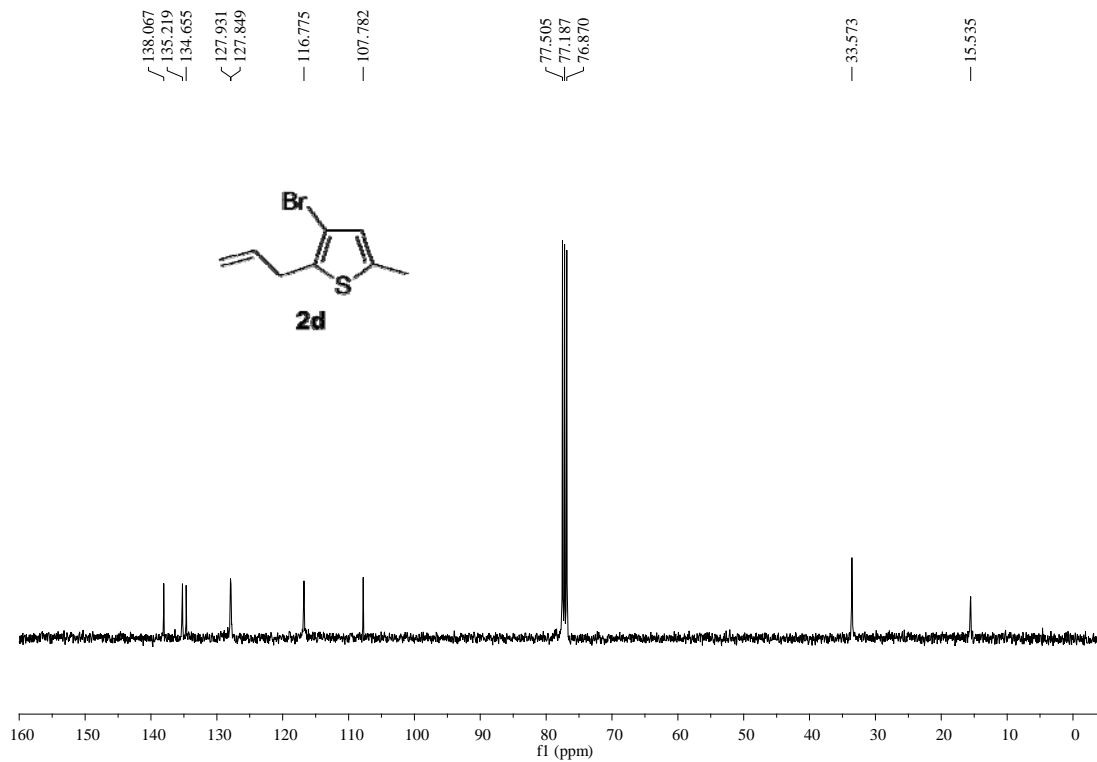

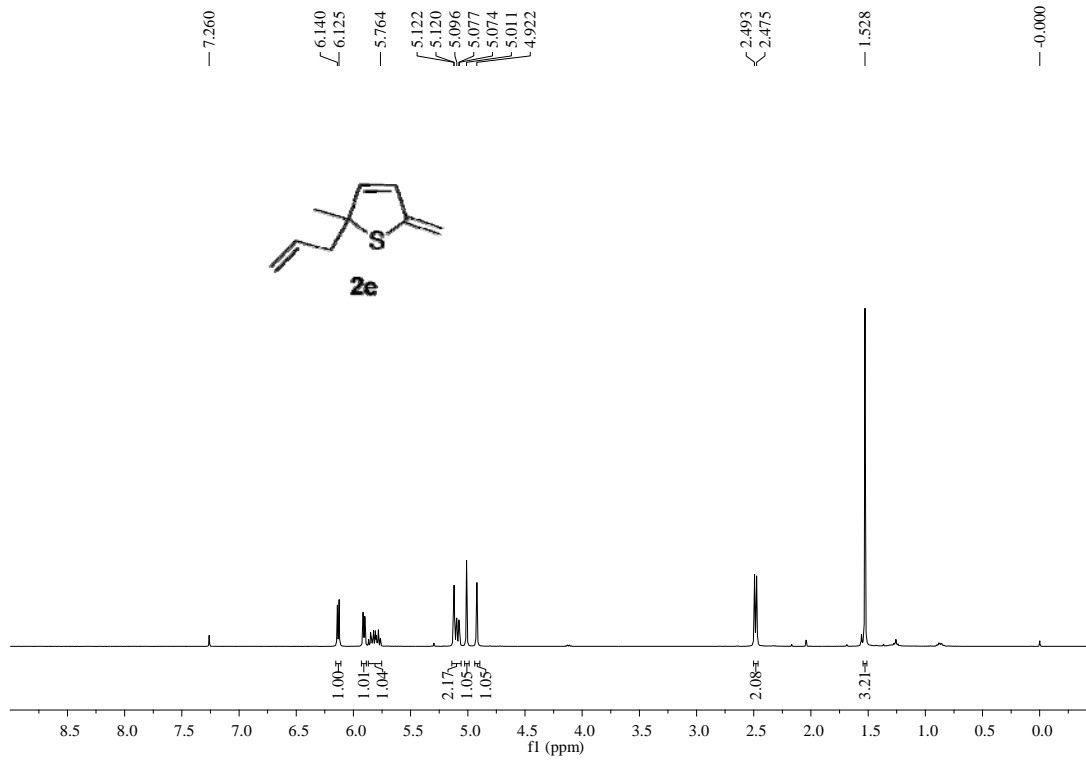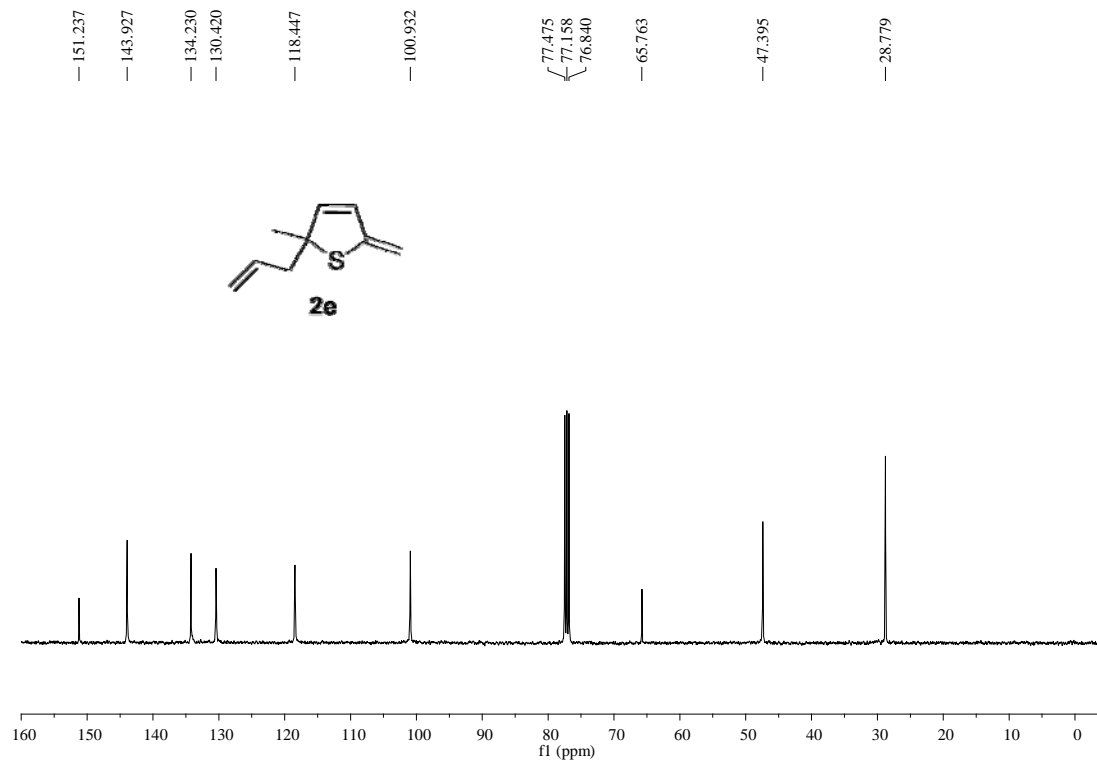

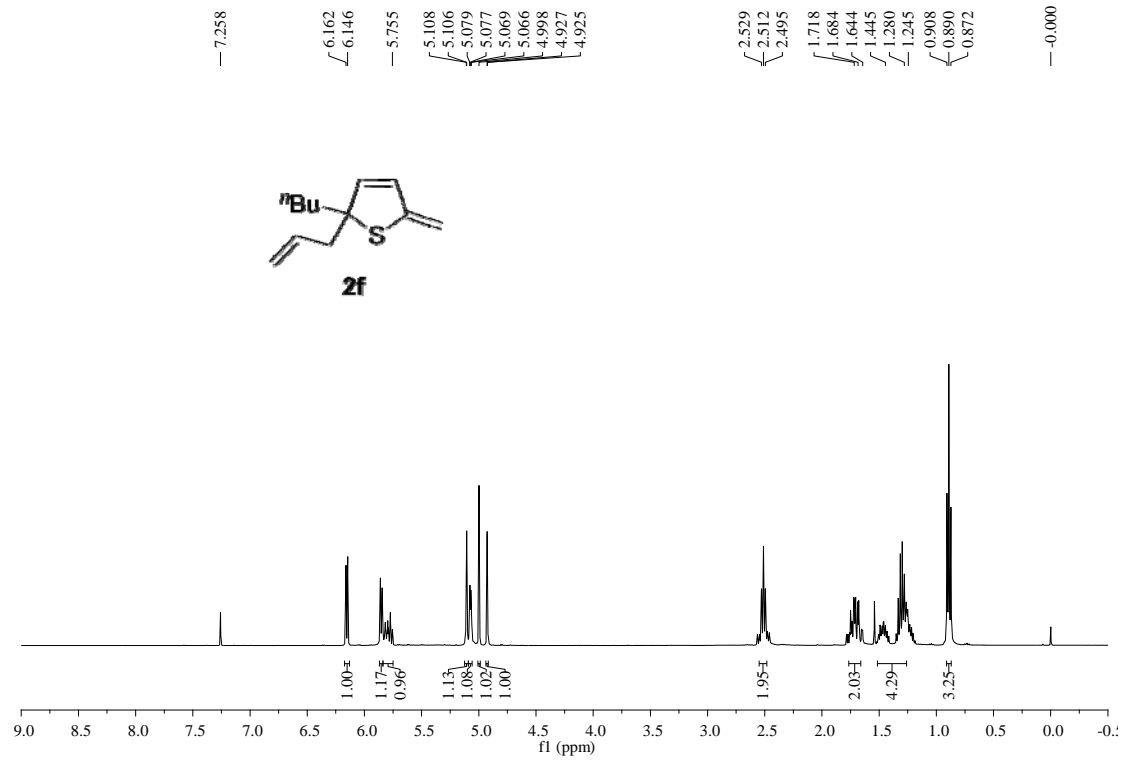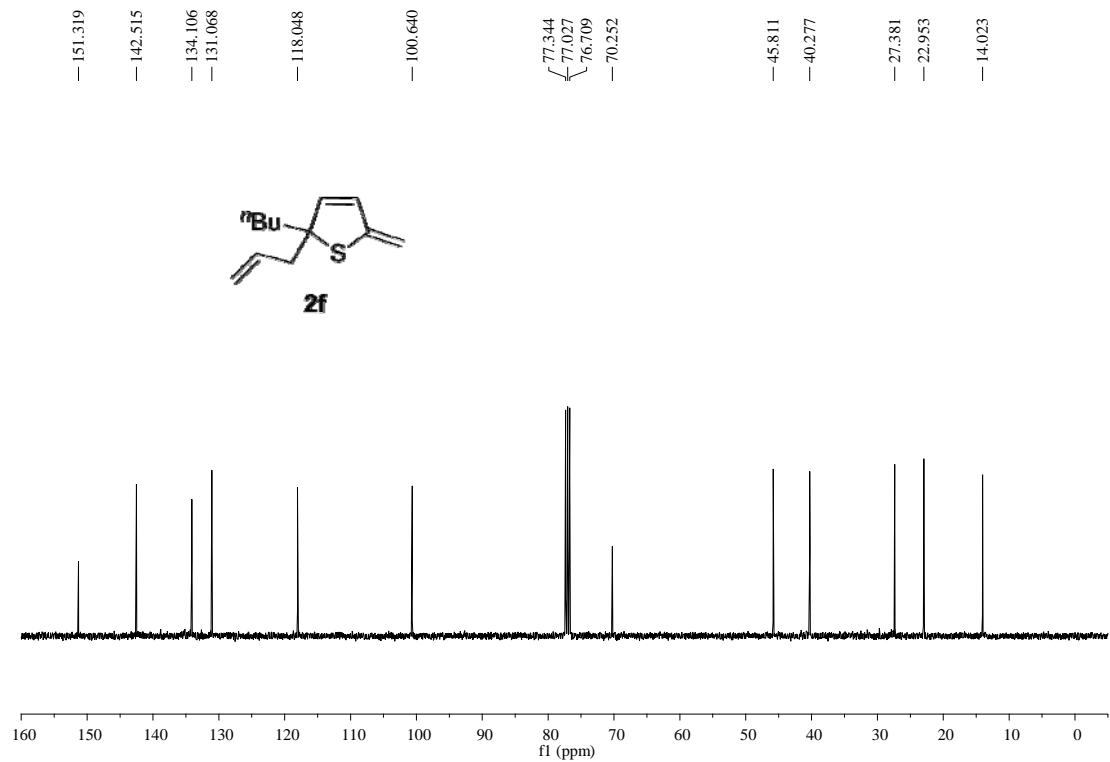

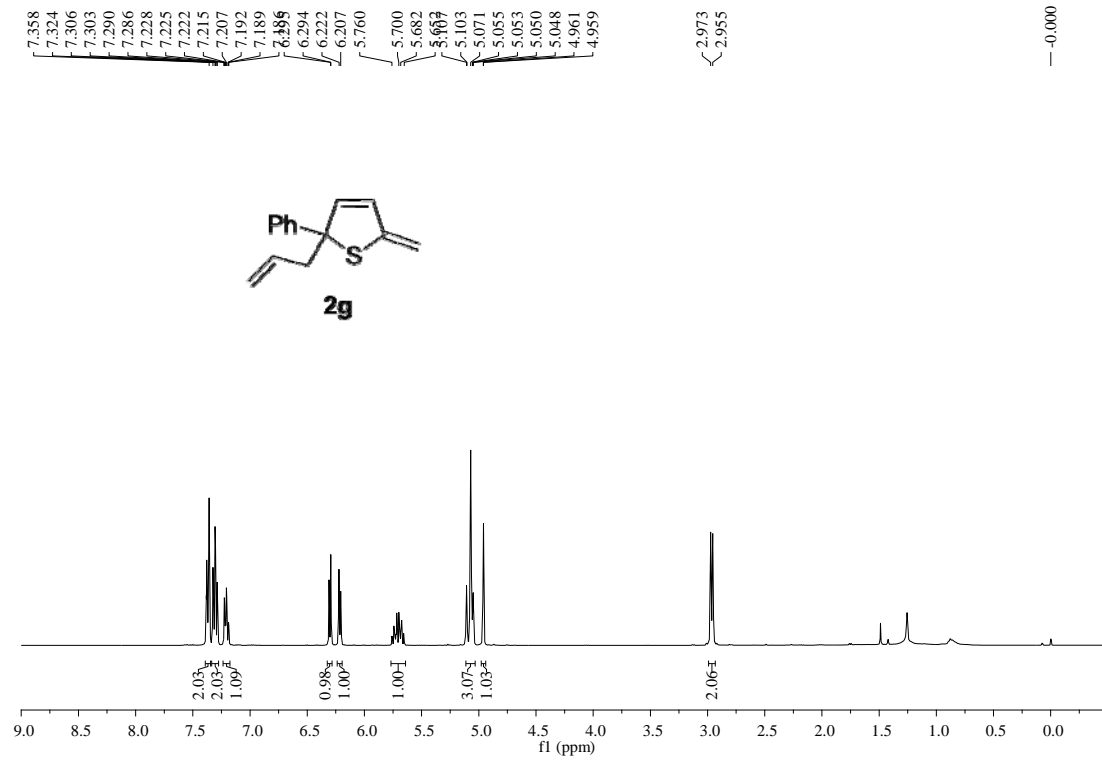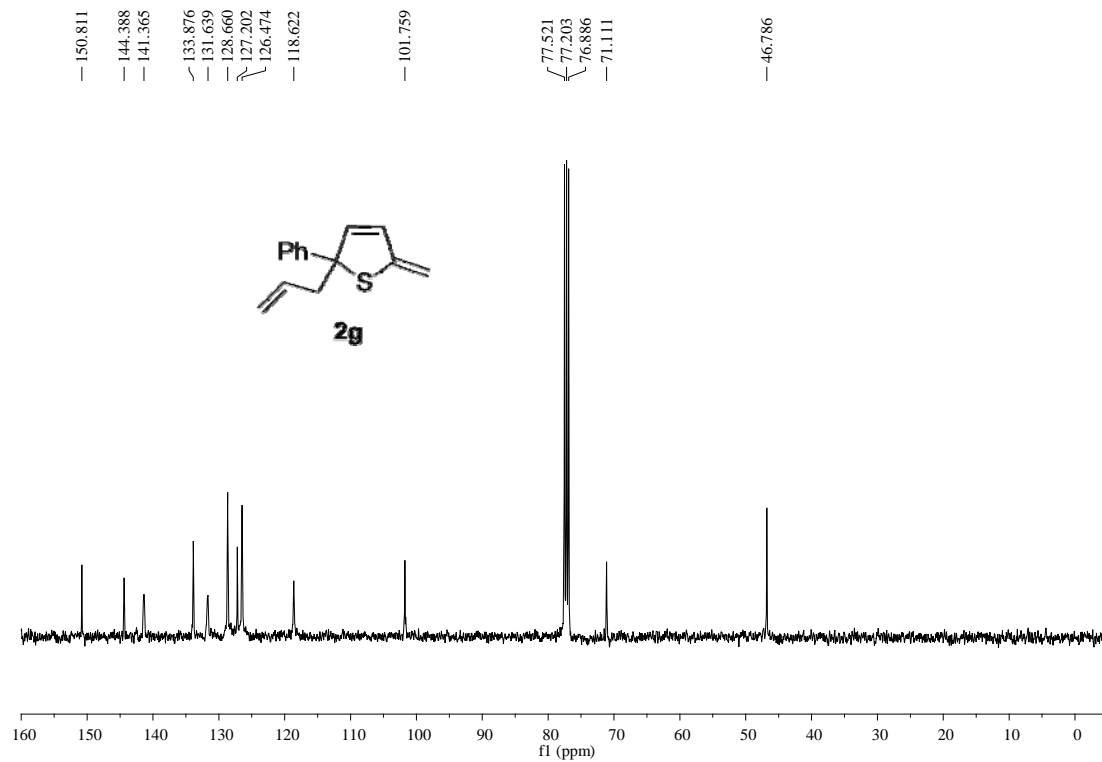

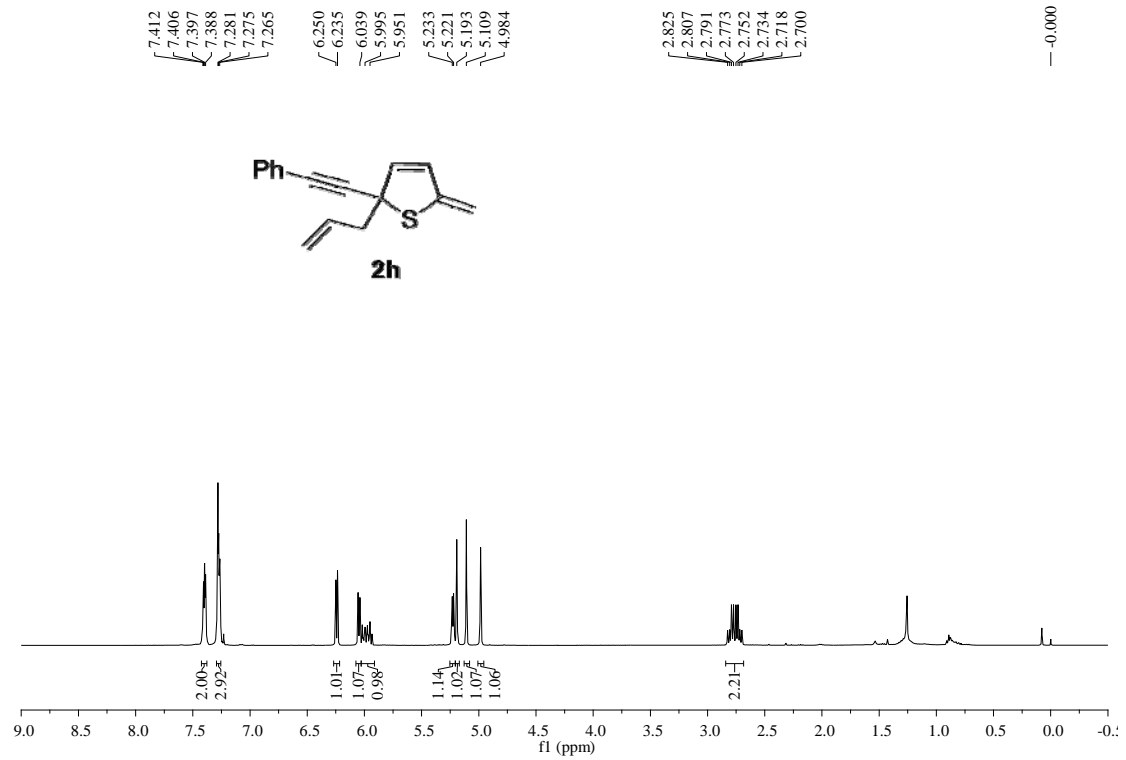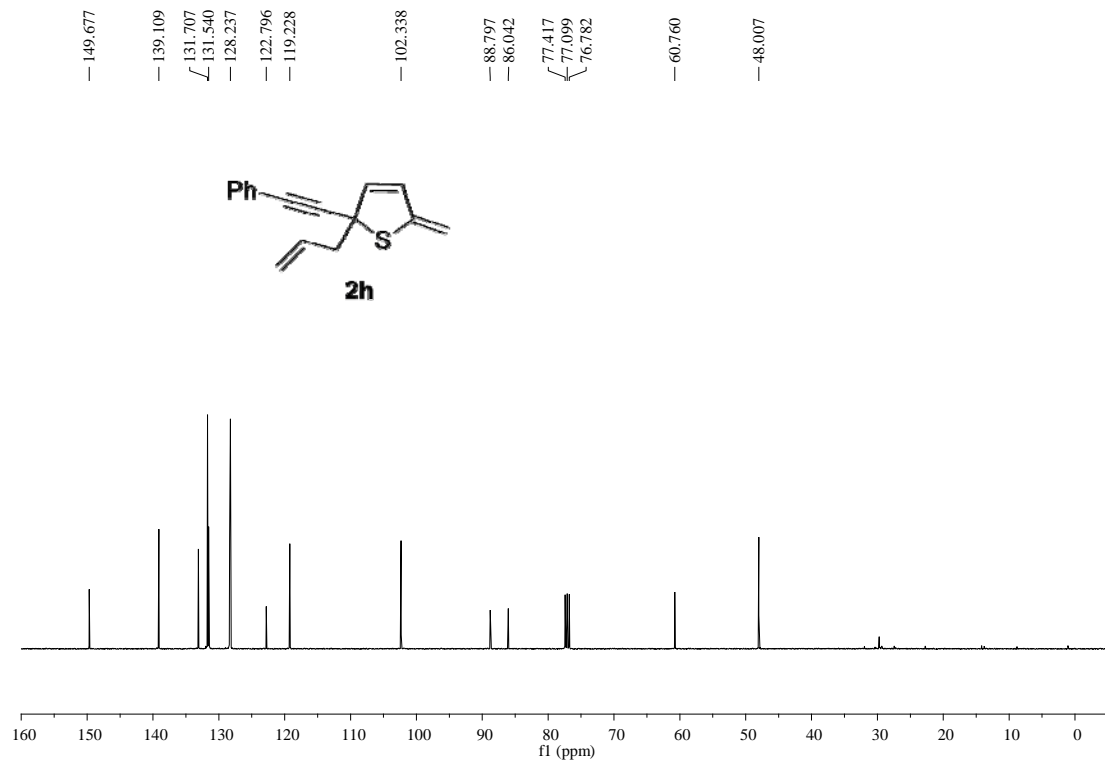

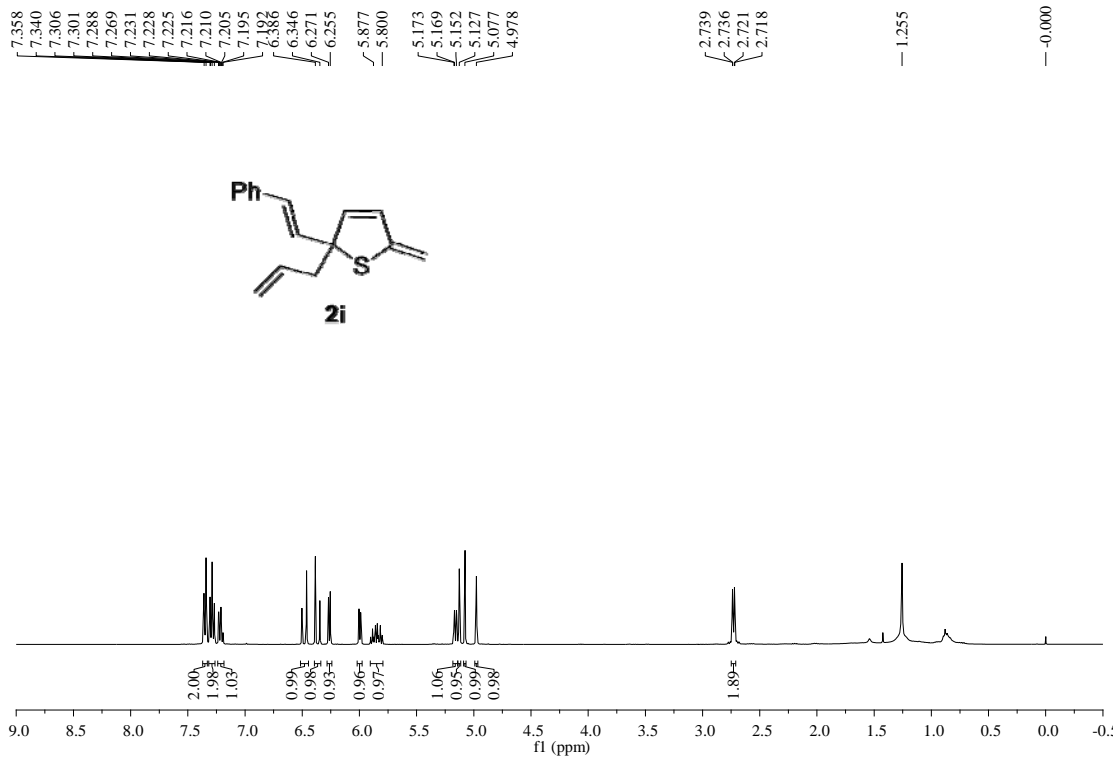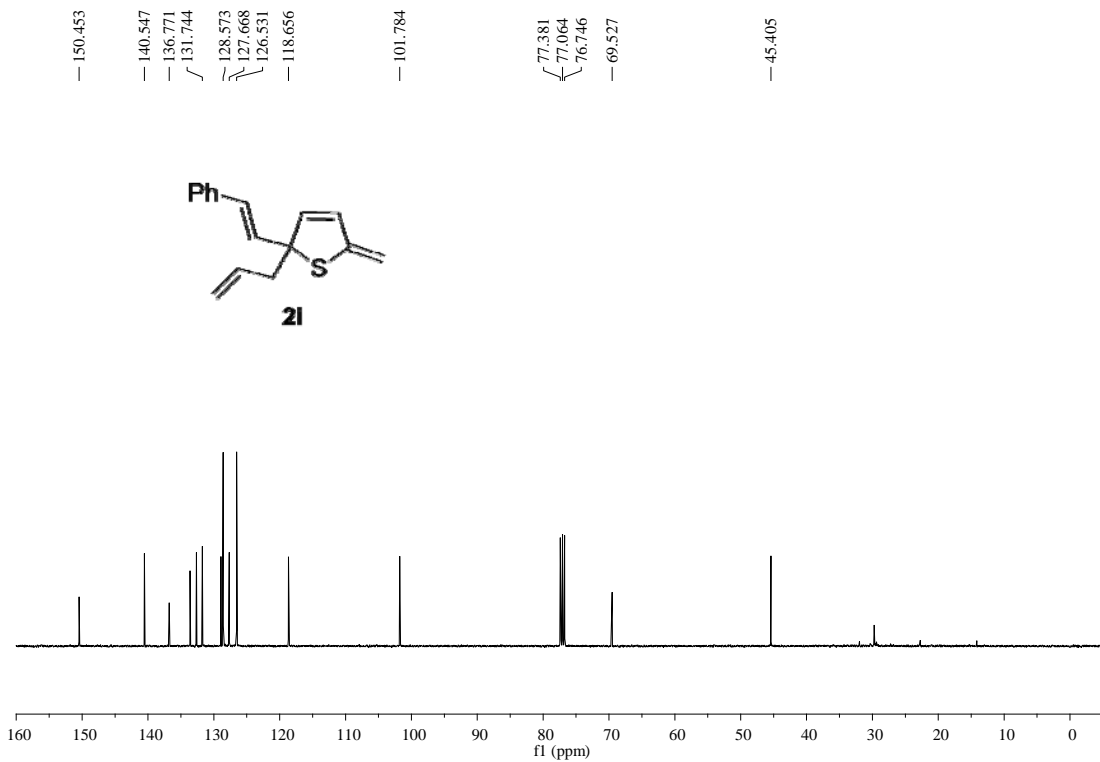

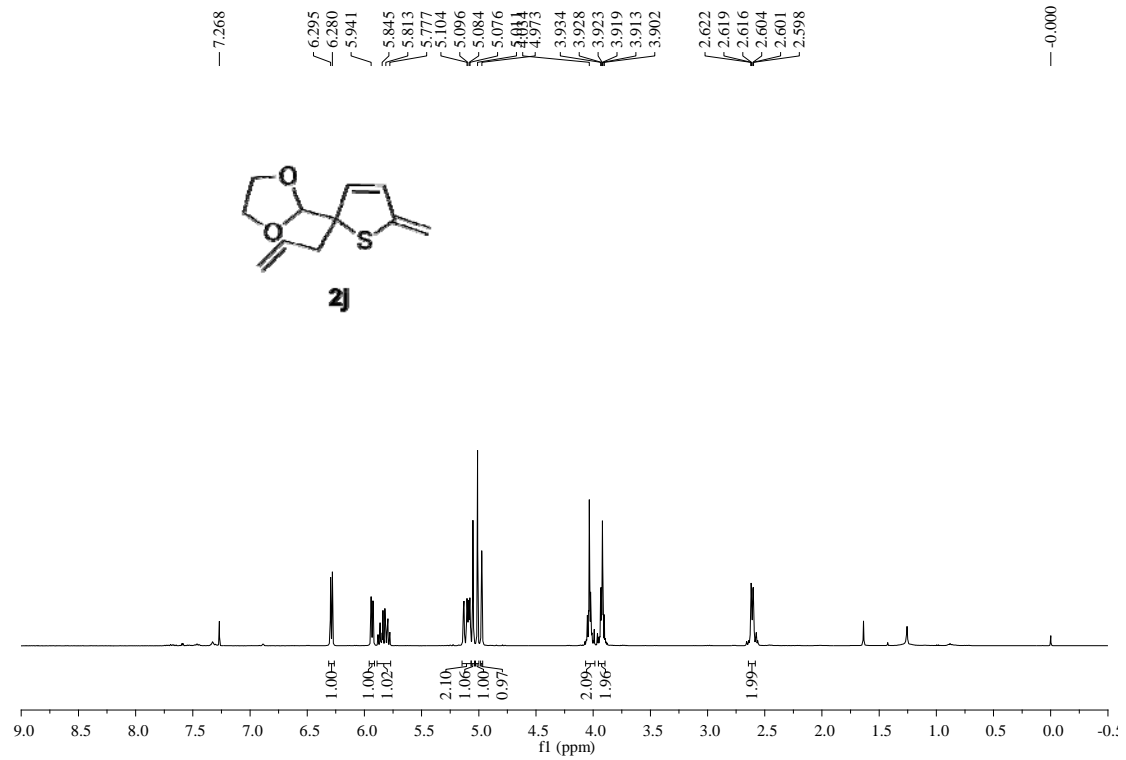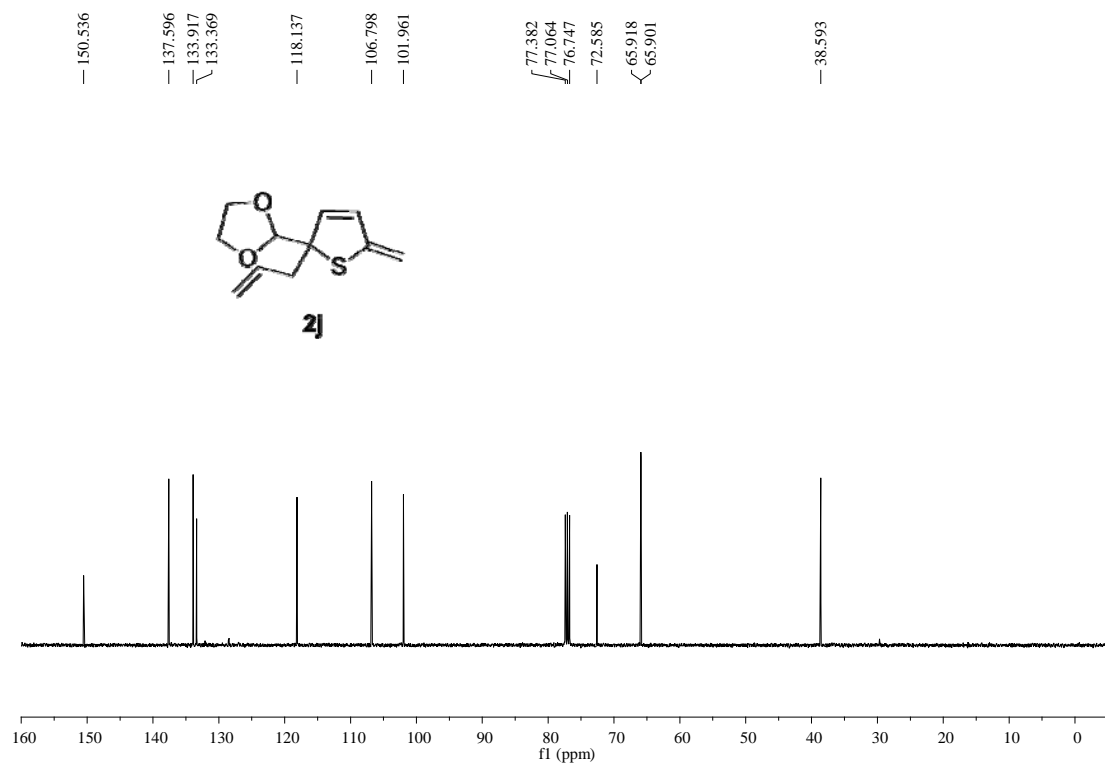



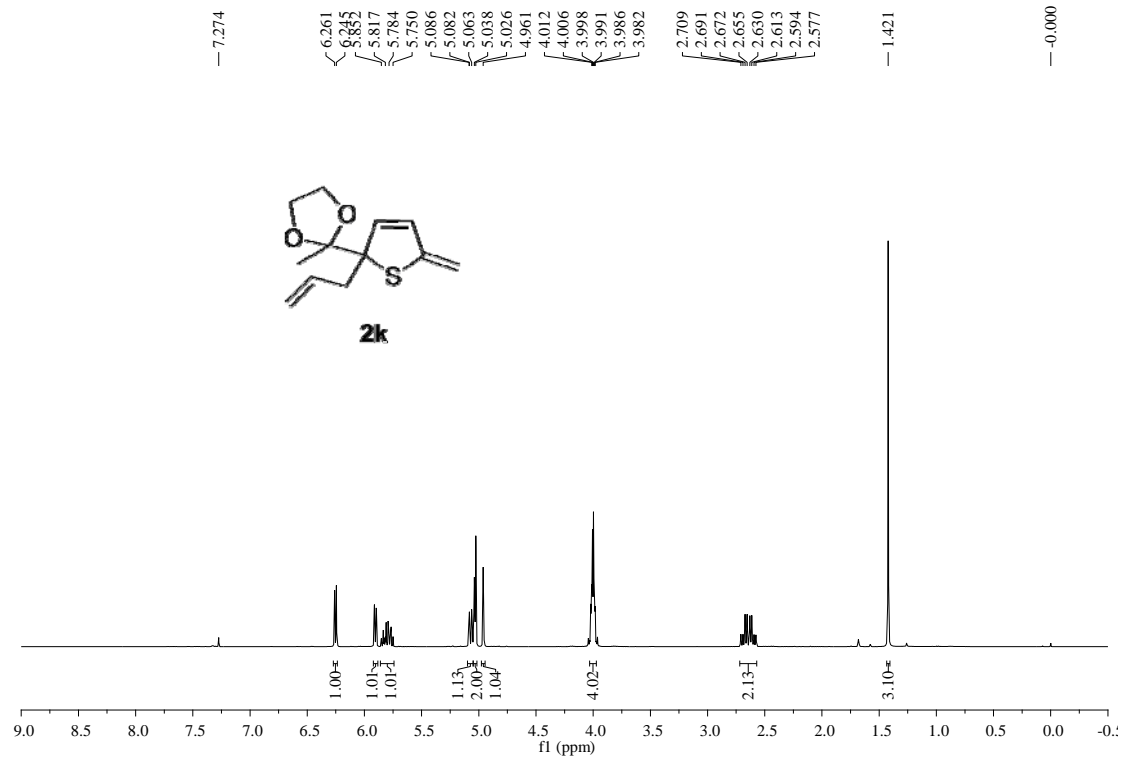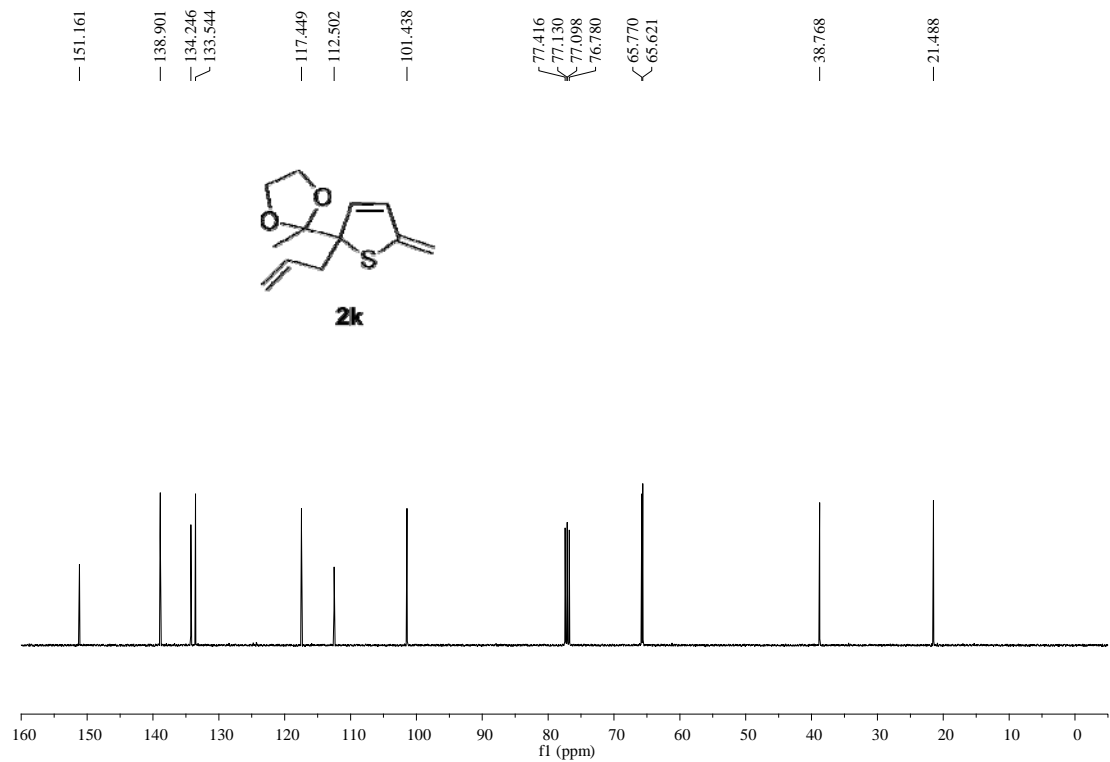

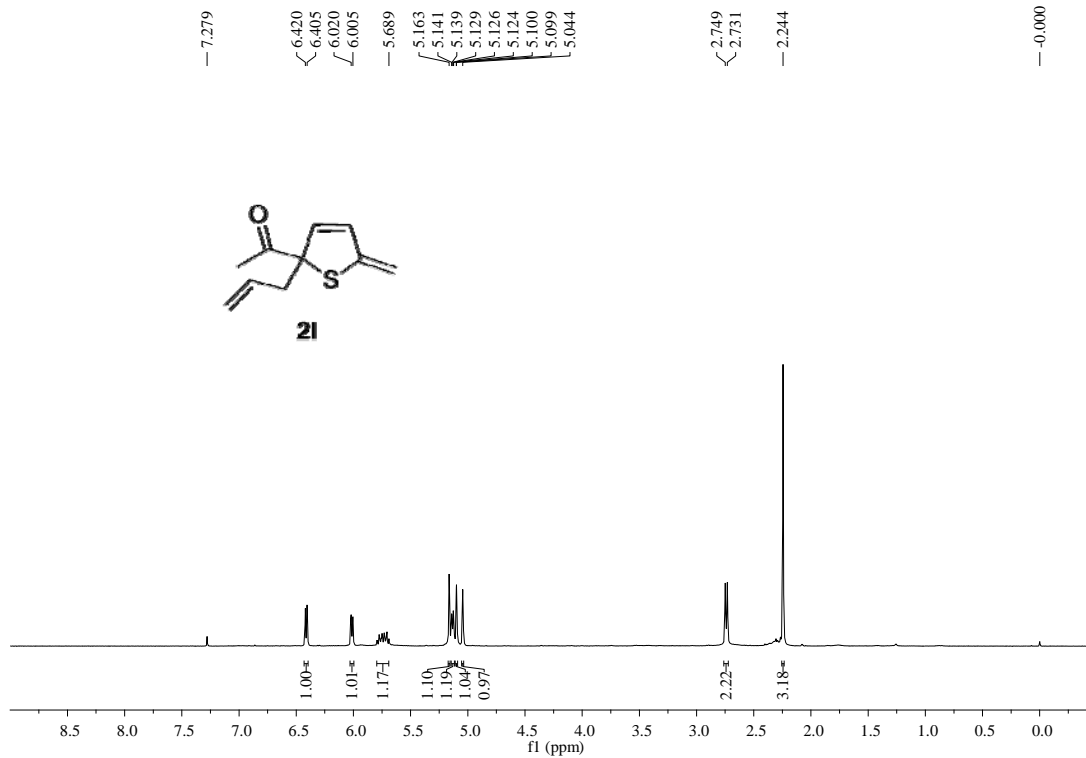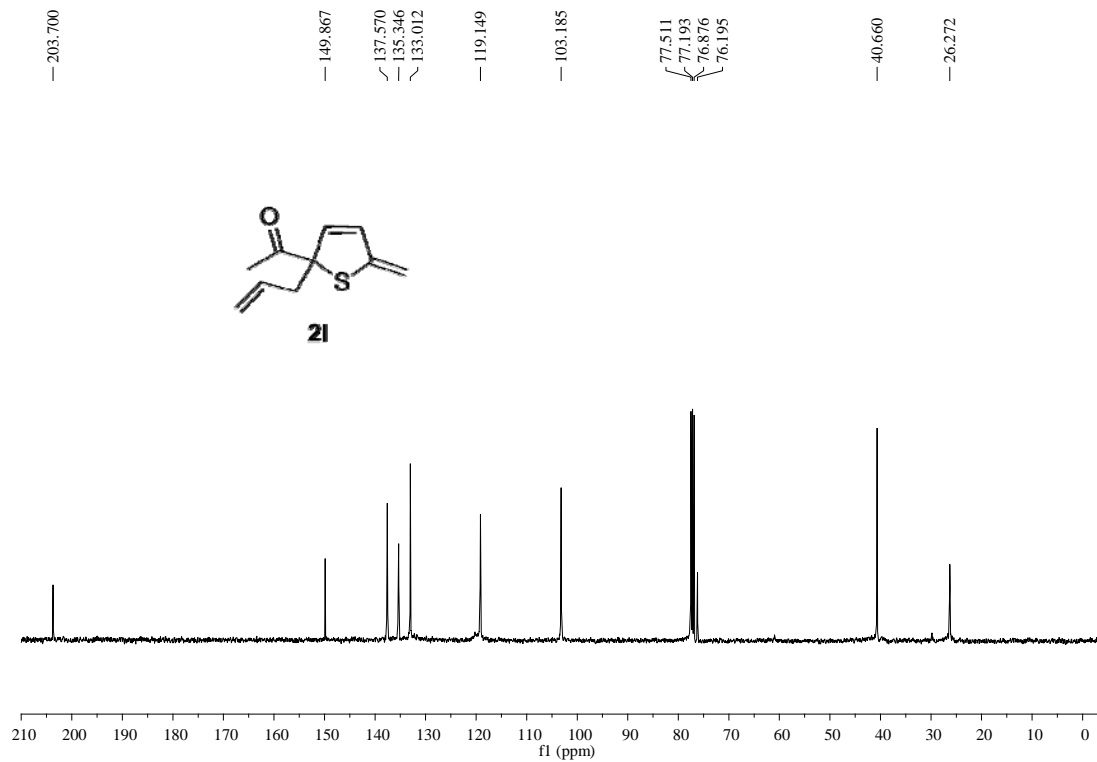

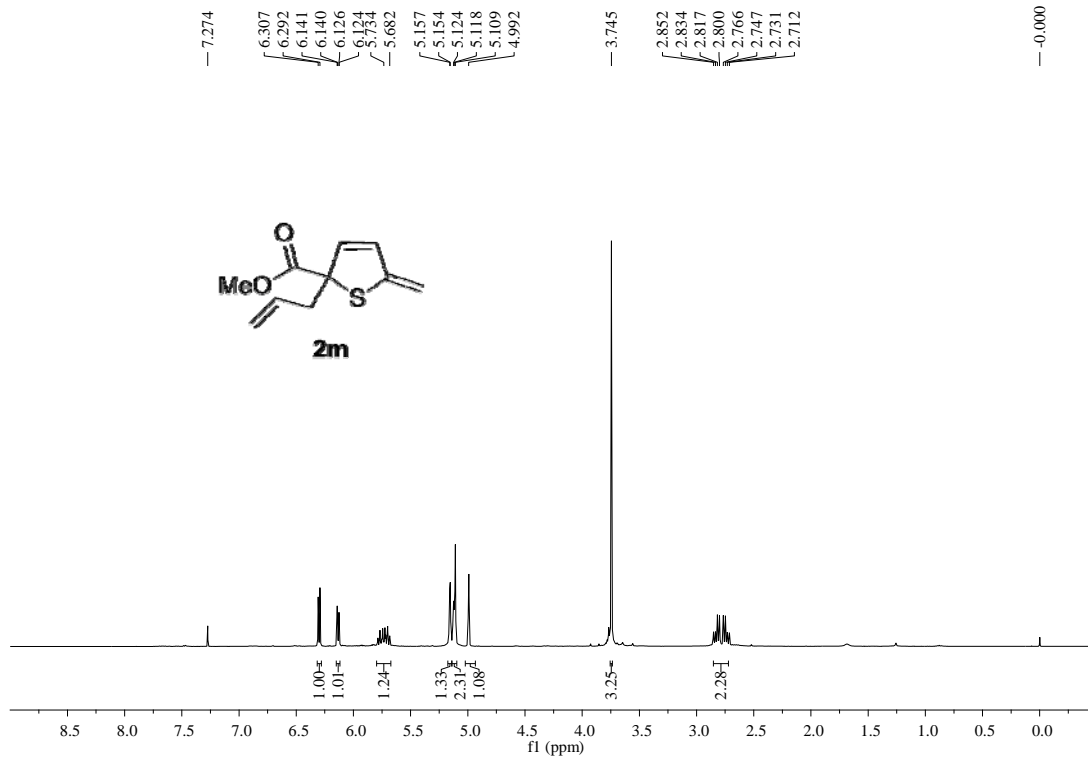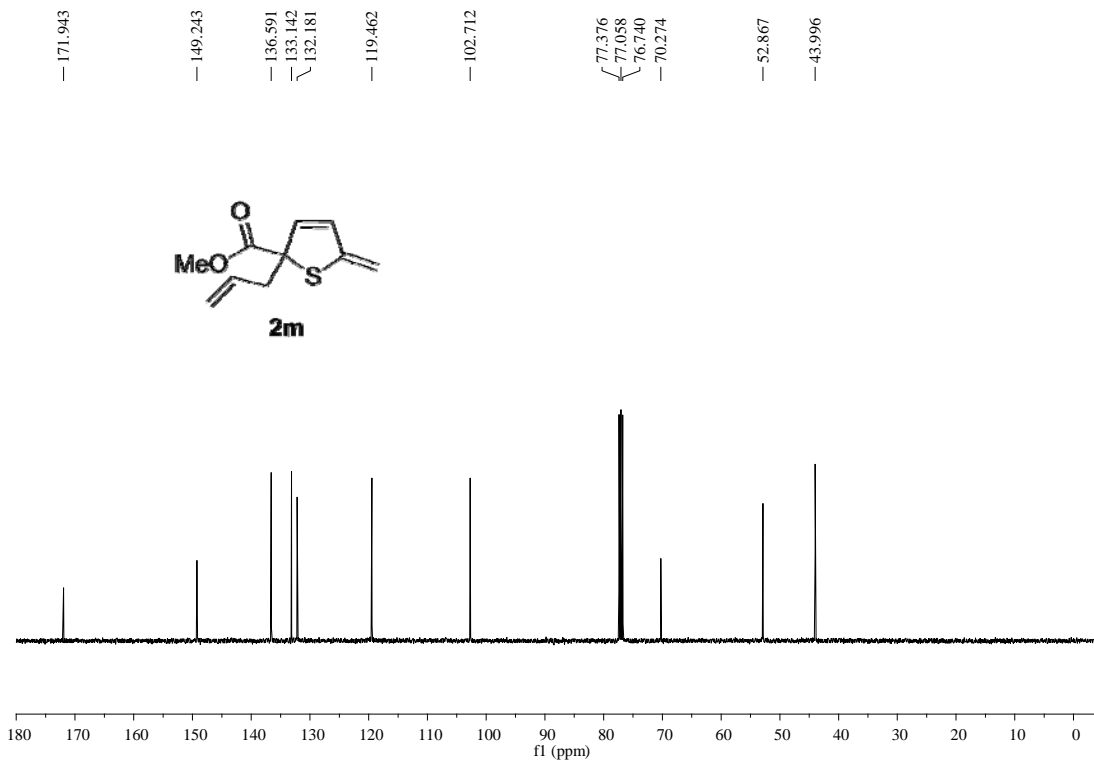

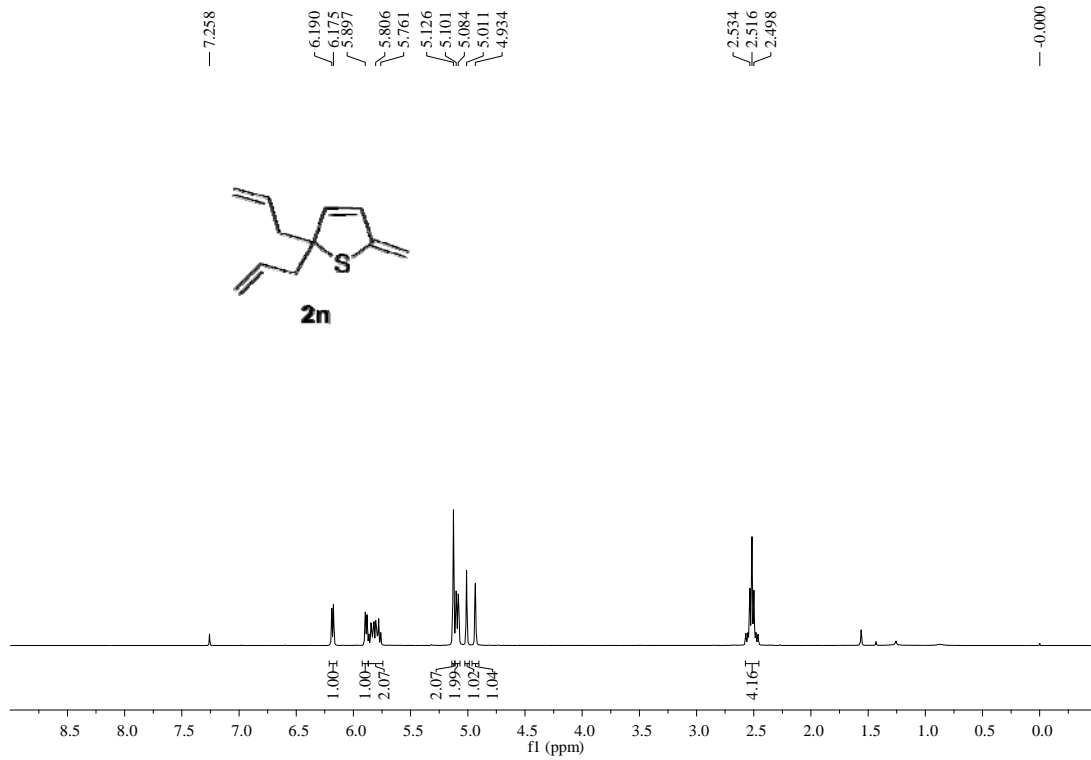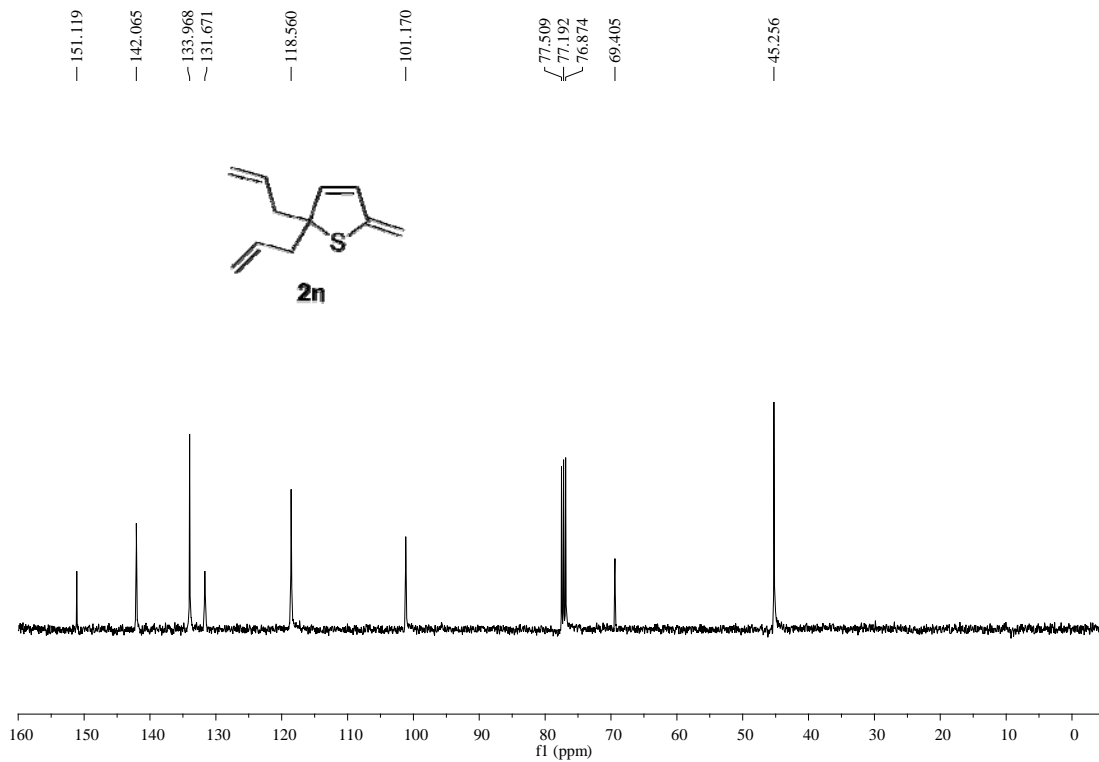

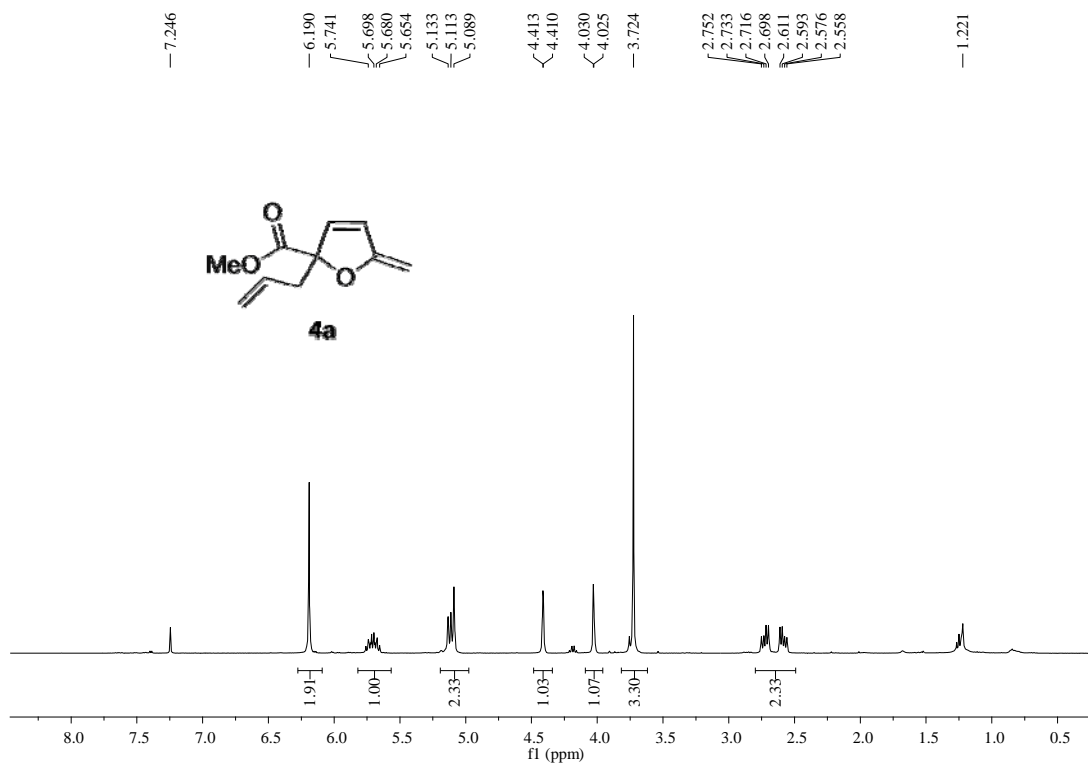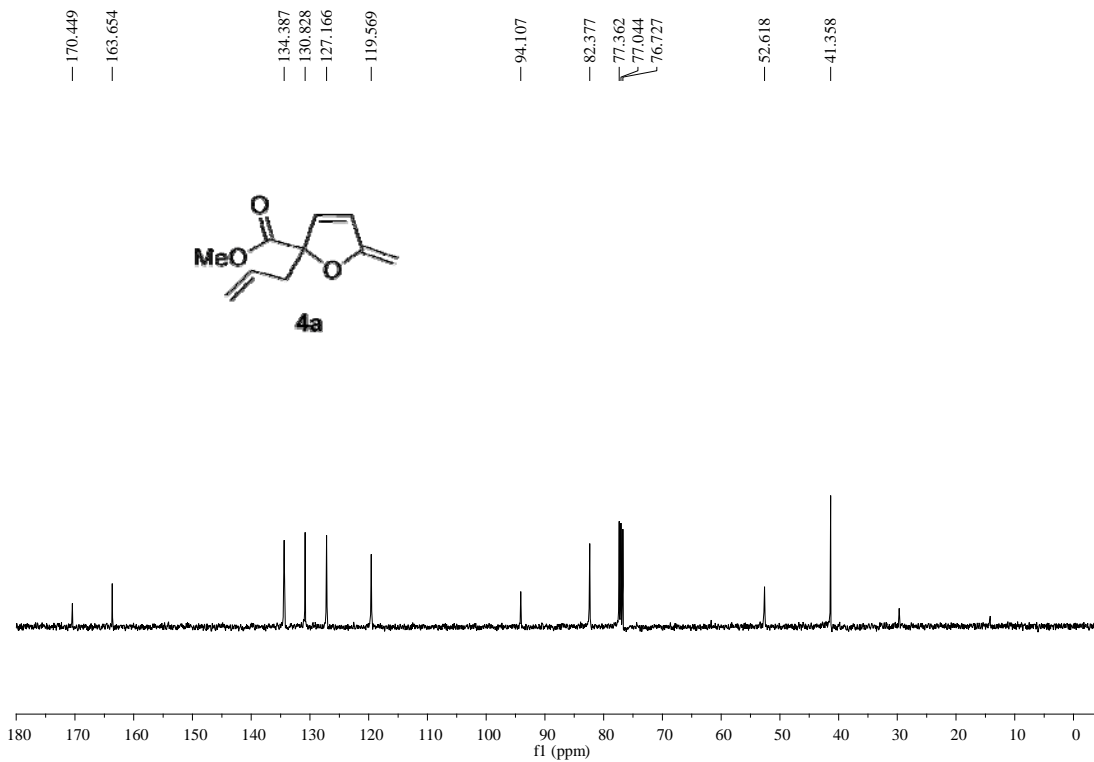

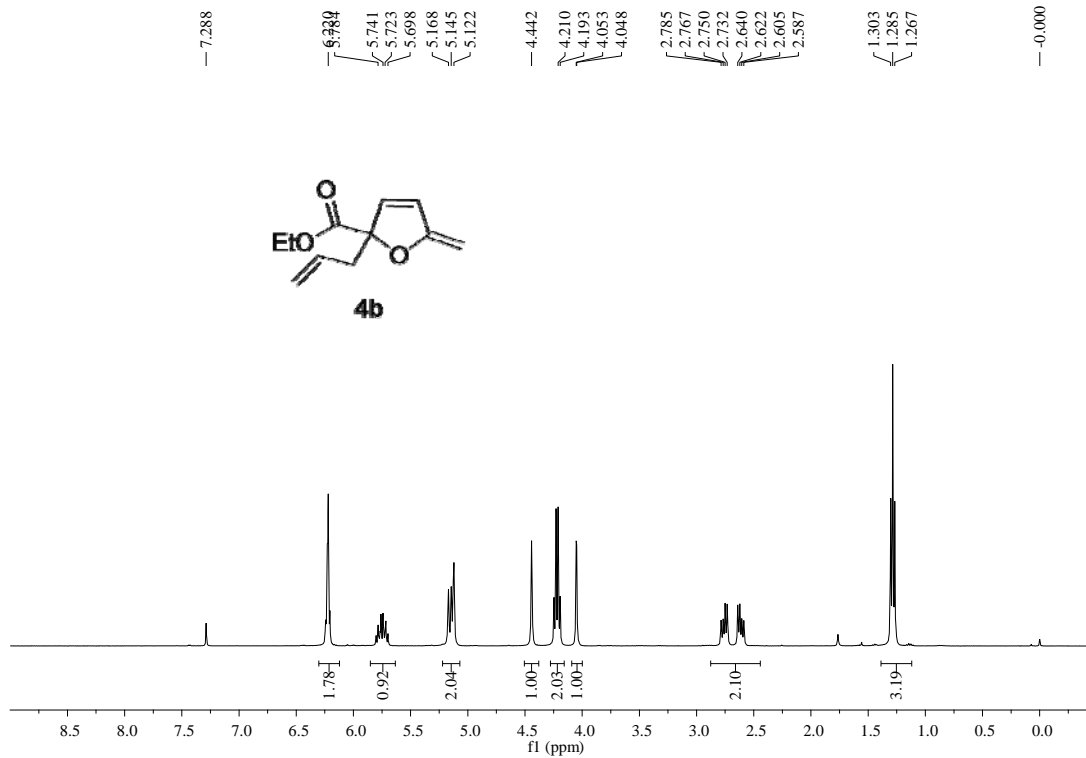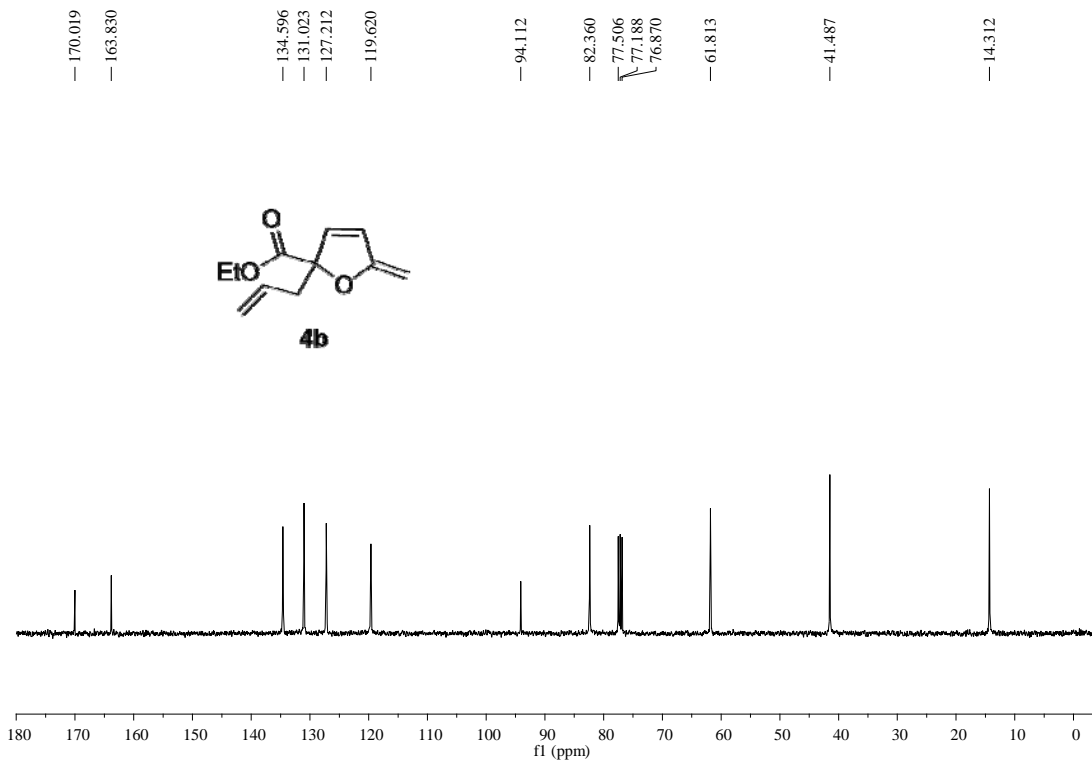

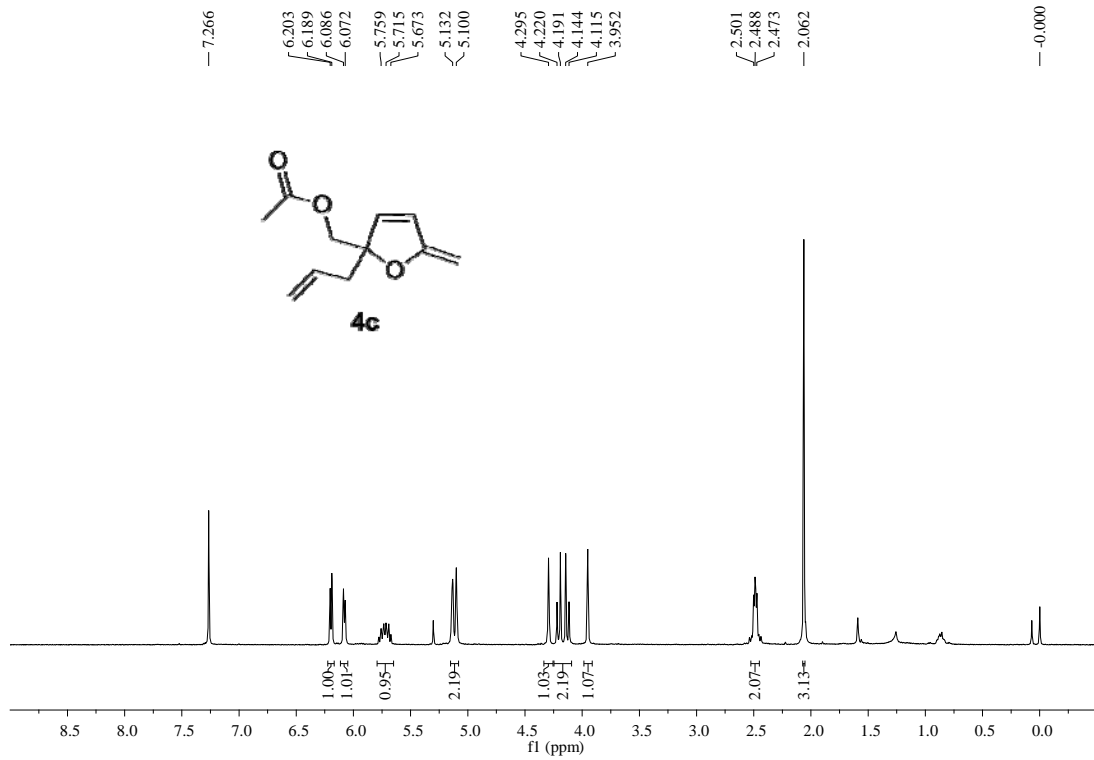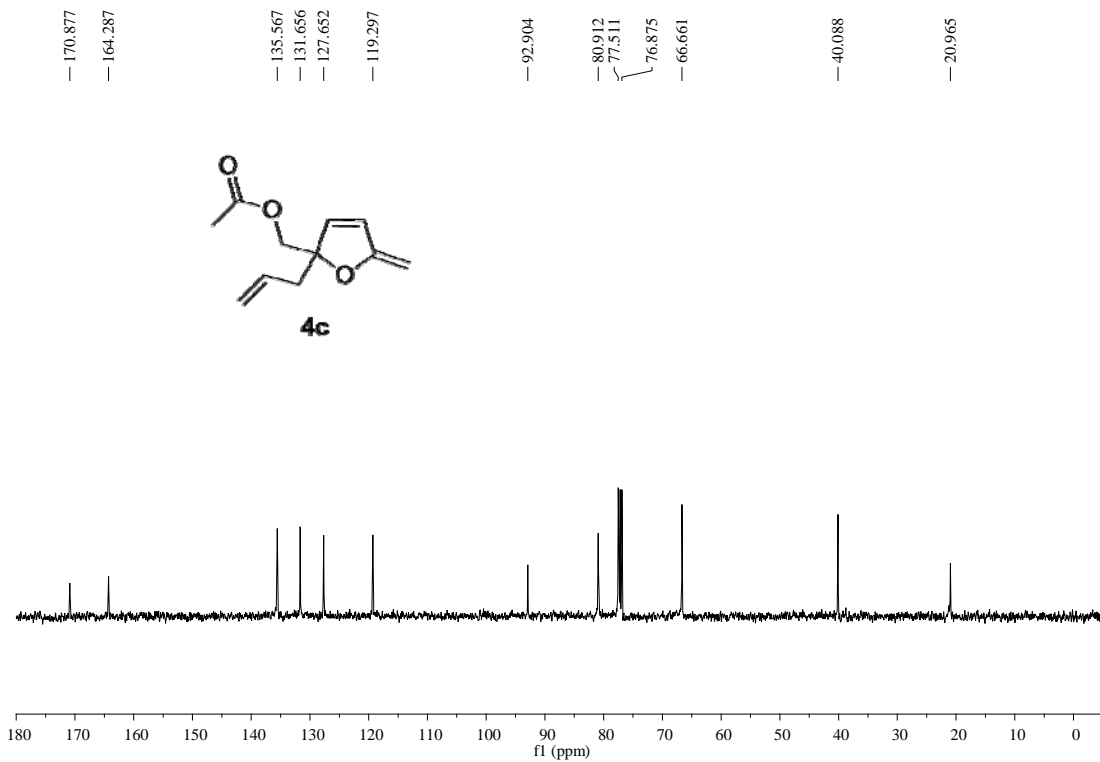

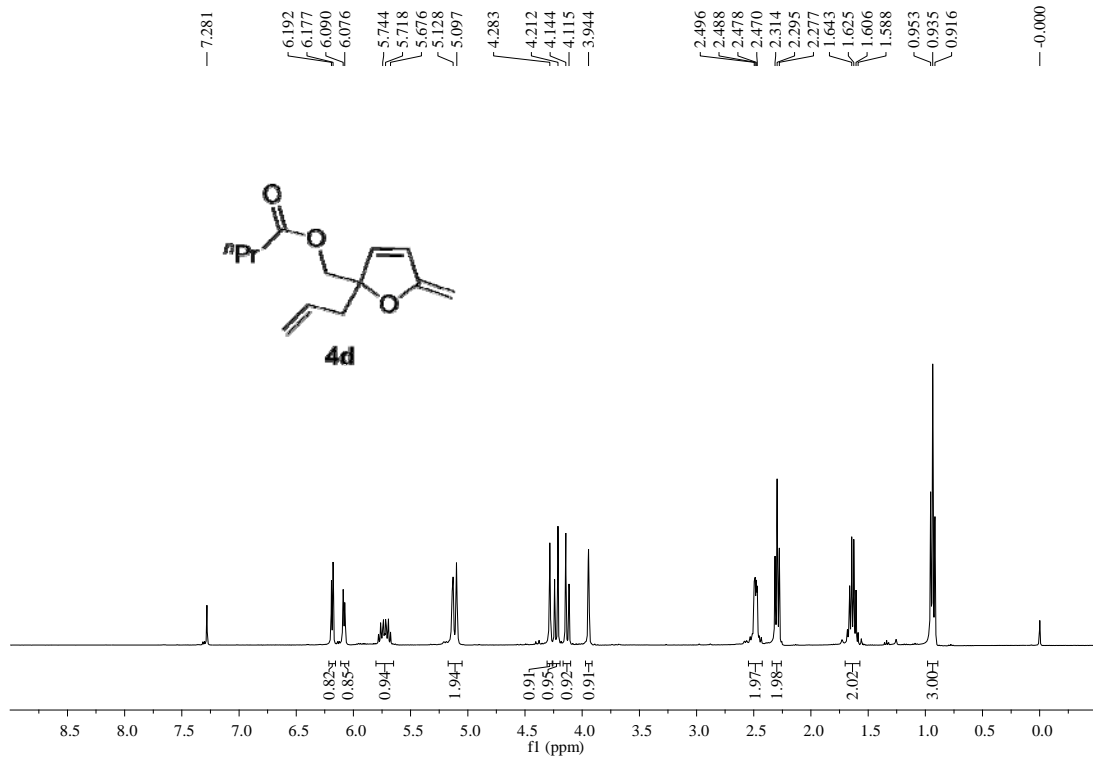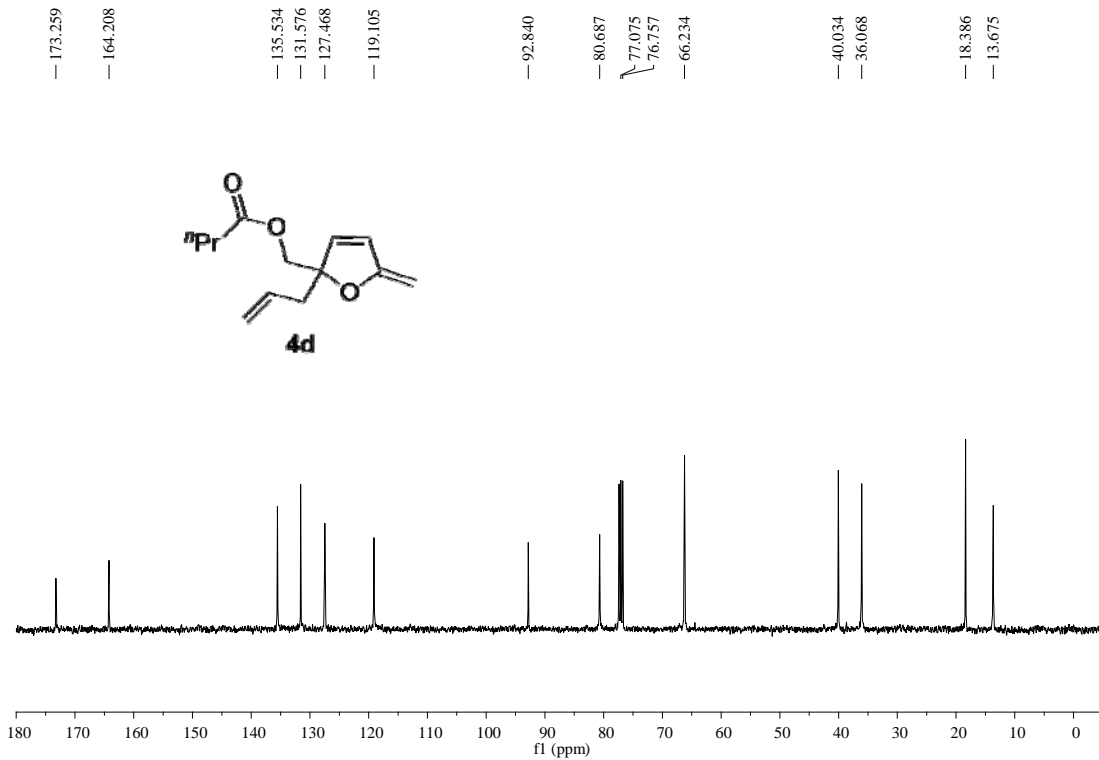



8.024  
 8.005  
 7.564  
 7.545  
 7.455  
 7.436  
 7.417  
 7.263  
 6.227  
 6.213  
 6.164  
 6.150  
 5.777  
 5.734  
 5.177  
 5.159  
 5.133  
 4.503  
 4.474  
 4.353  
 4.323  
 3.977  
 2.586  
 2.568  
 -0.000

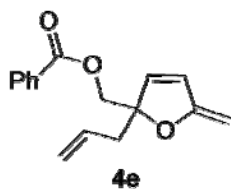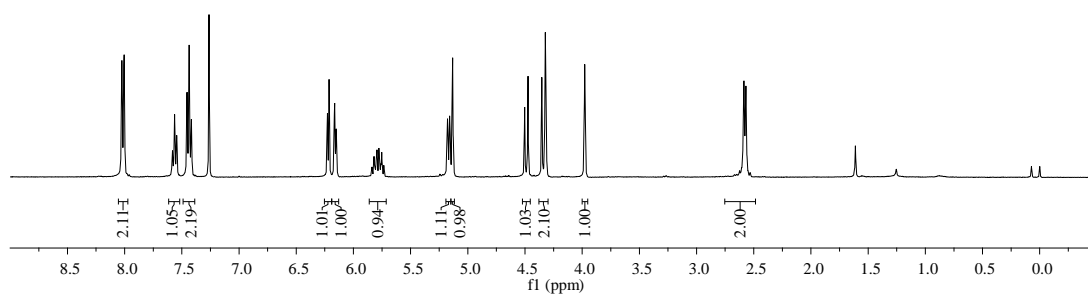

166.337  
 164.408  
 135.646  
 133.254  
 131.675  
 129.881  
 128.537  
 127.809  
 119.395  
 93.040  
 80.950  
 77.182  
 76.864  
 67.111  
 40.313

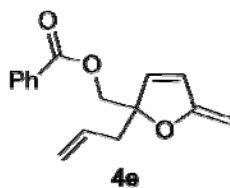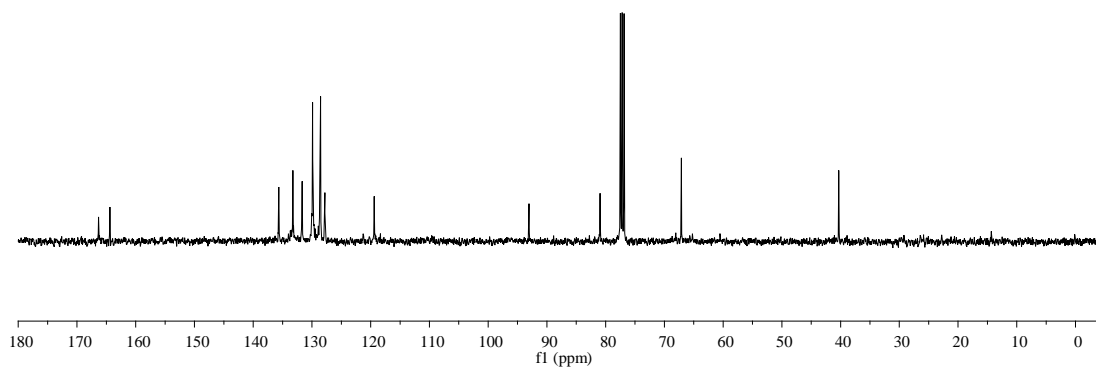

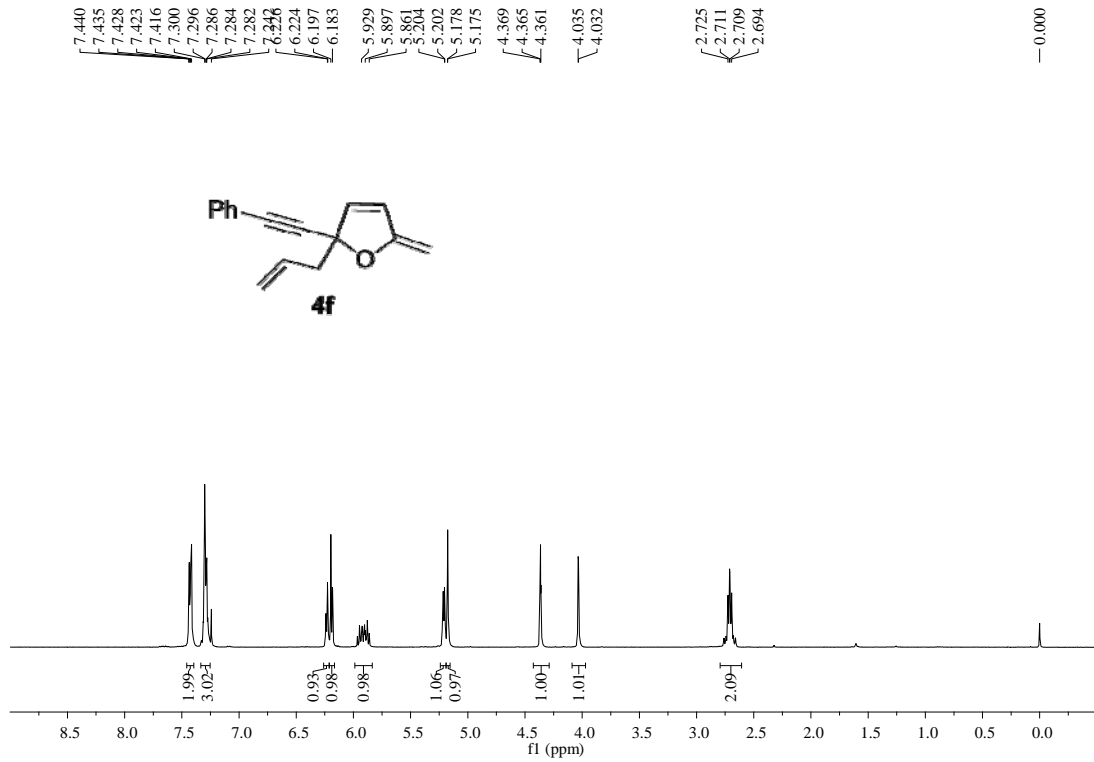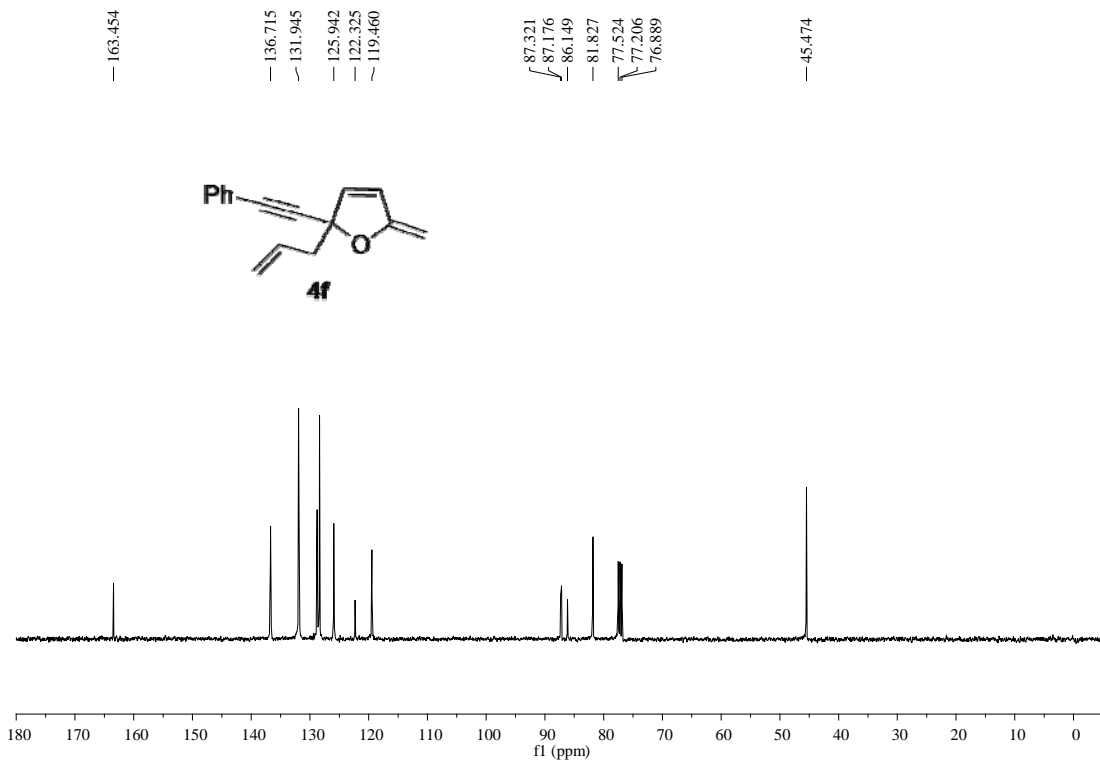

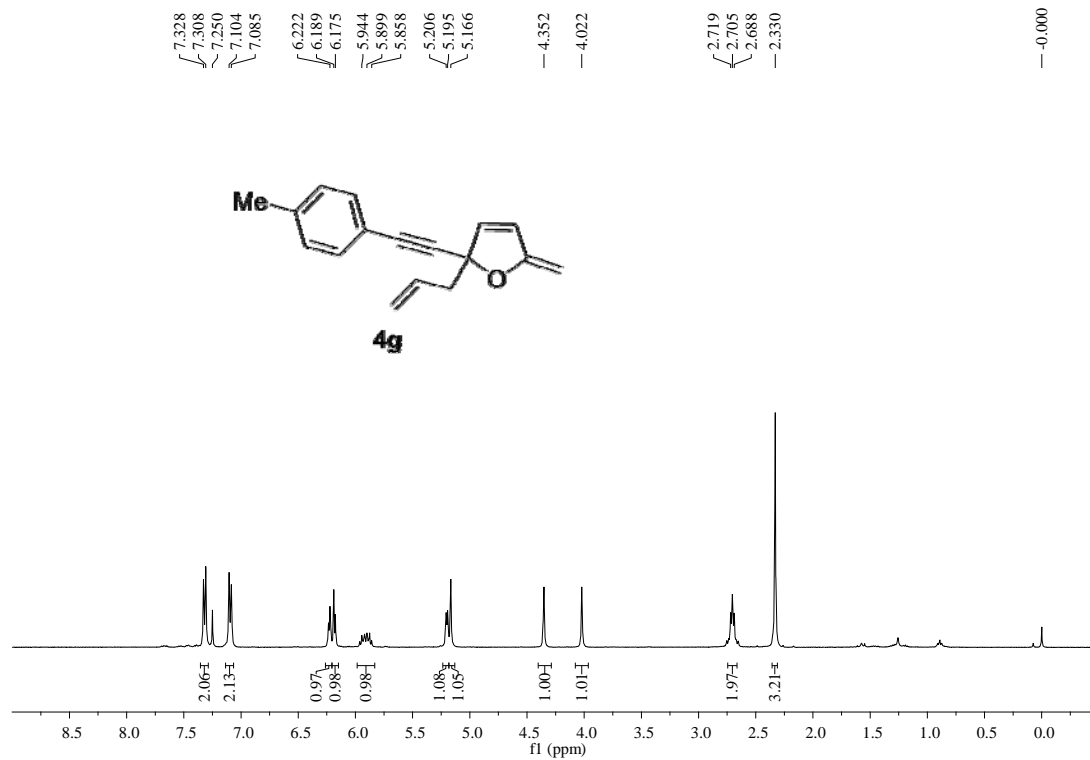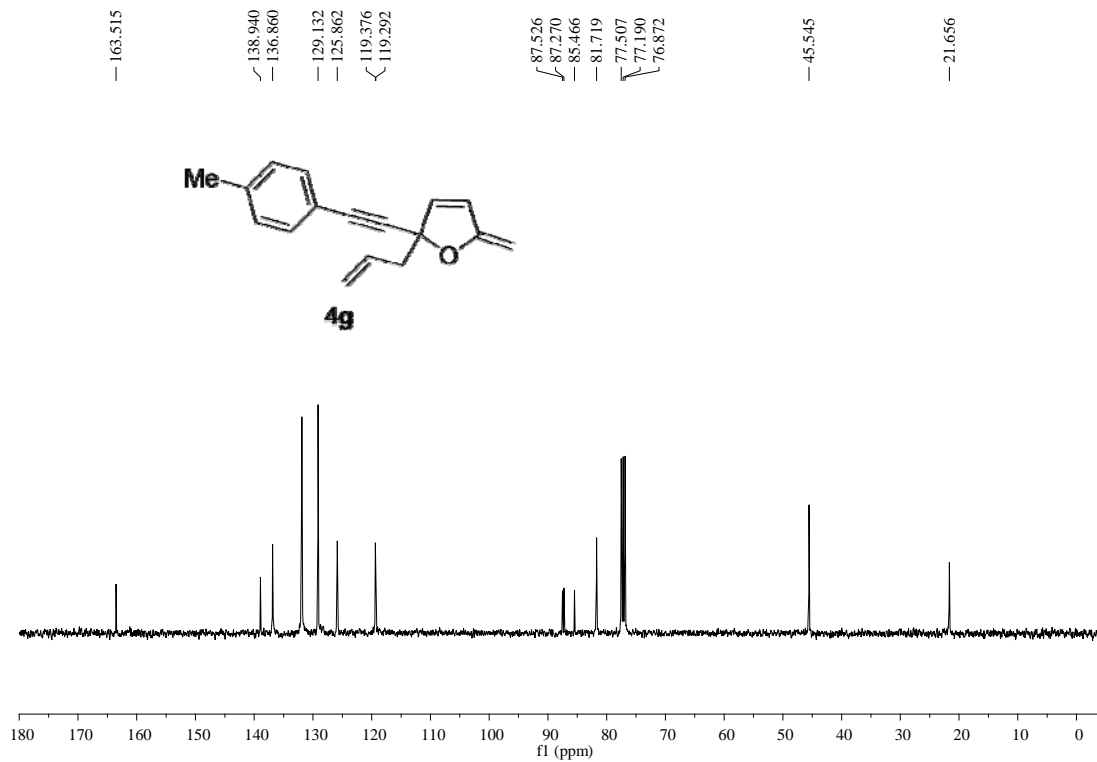

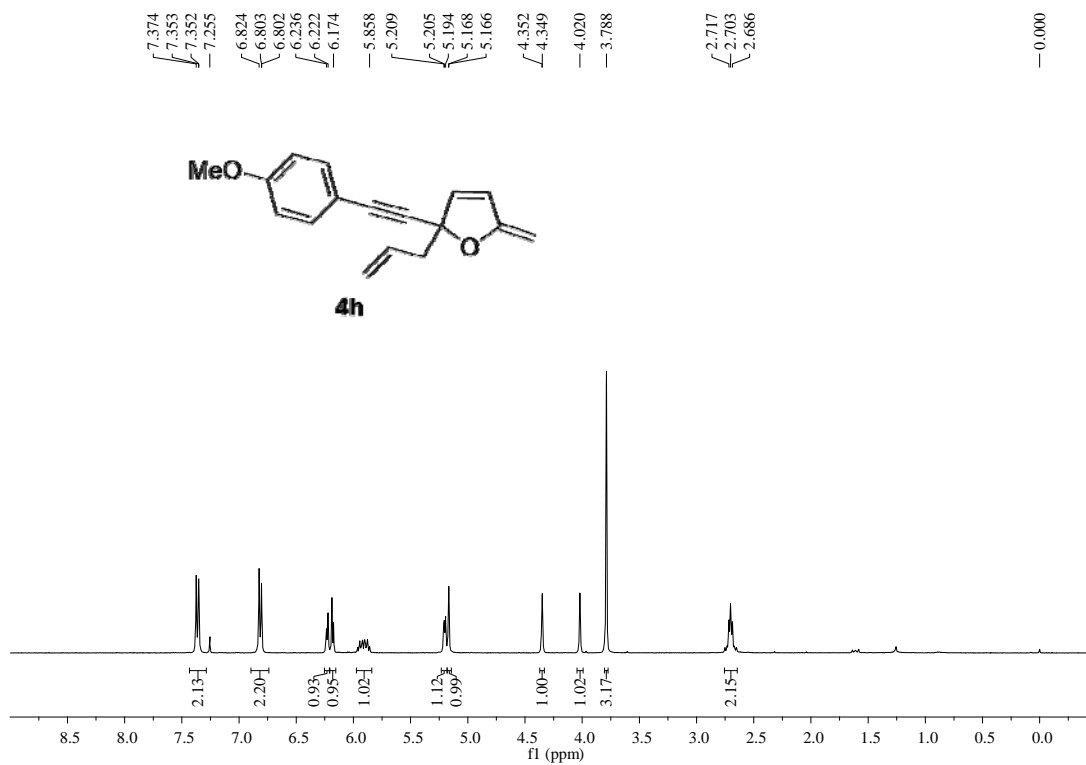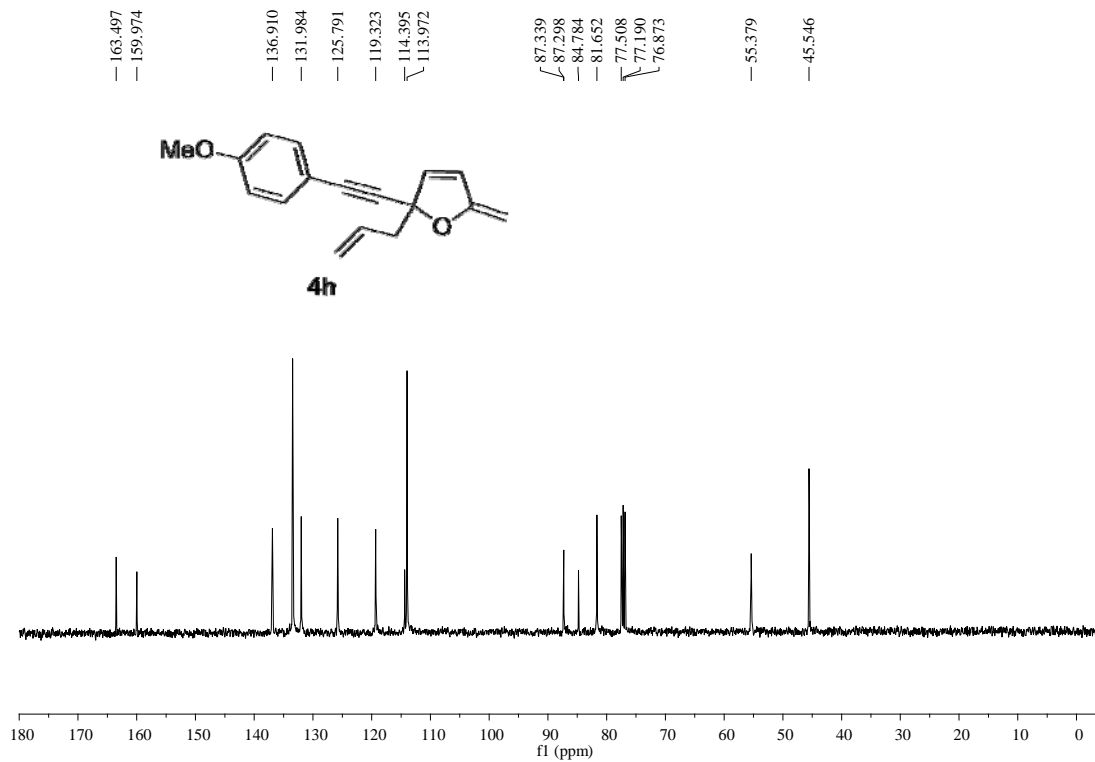

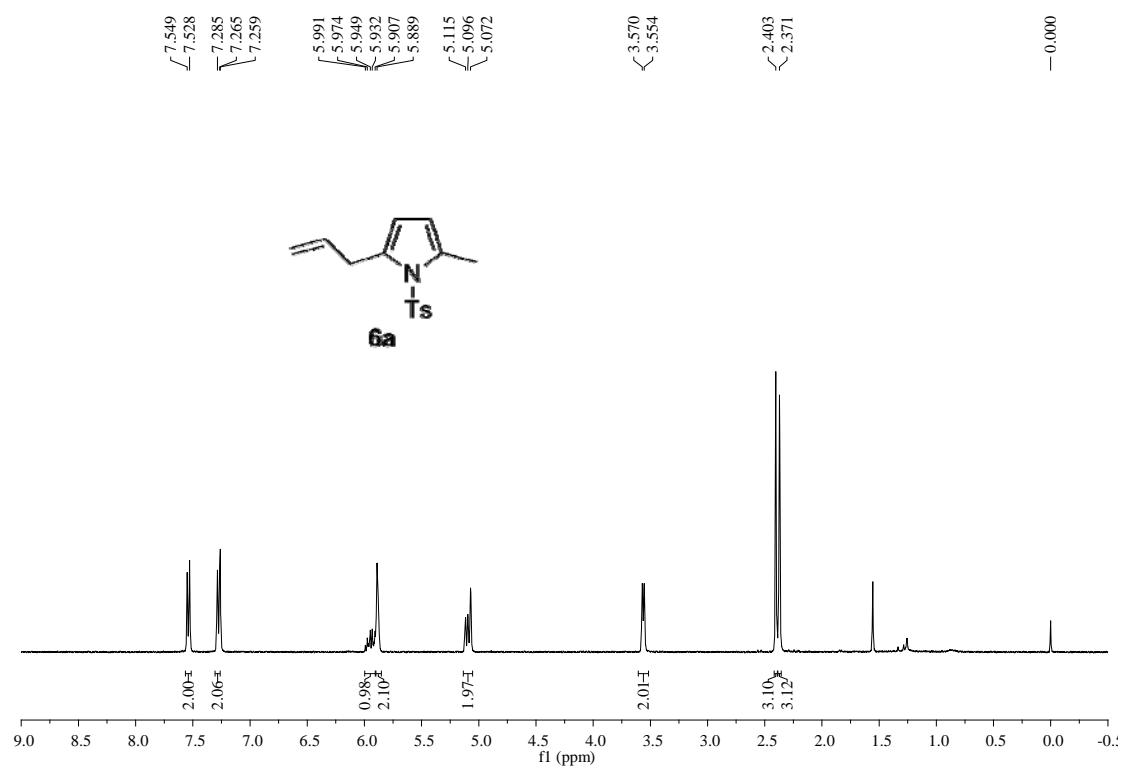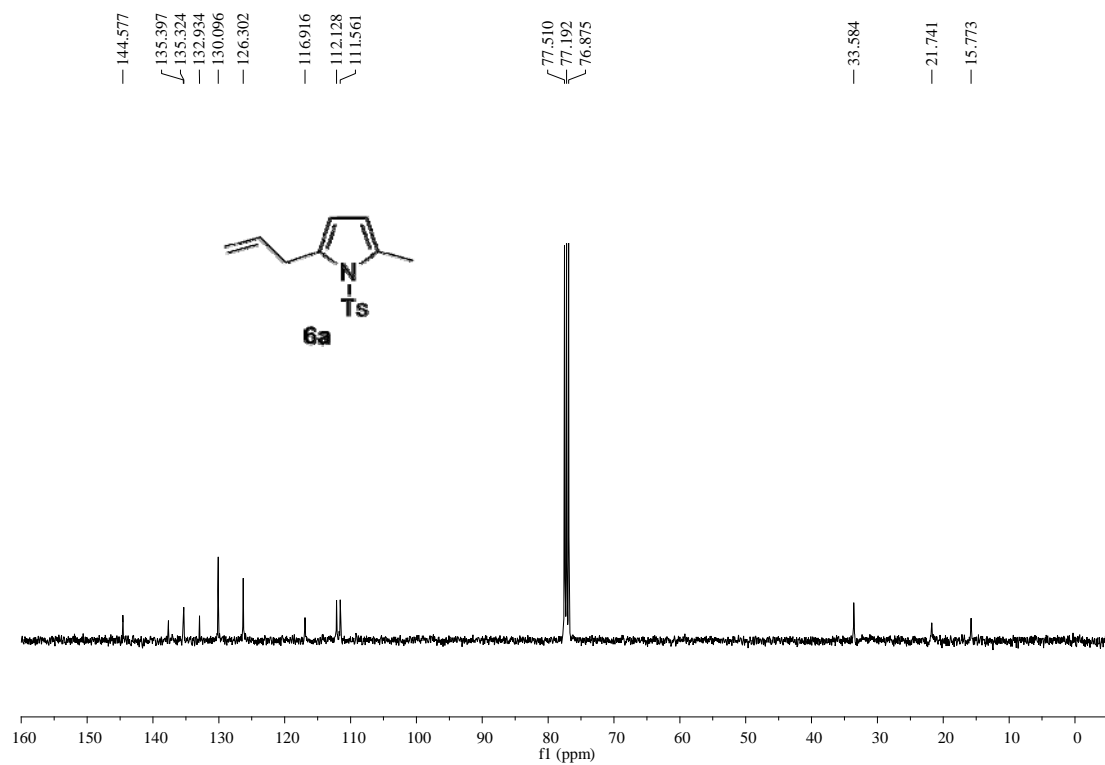

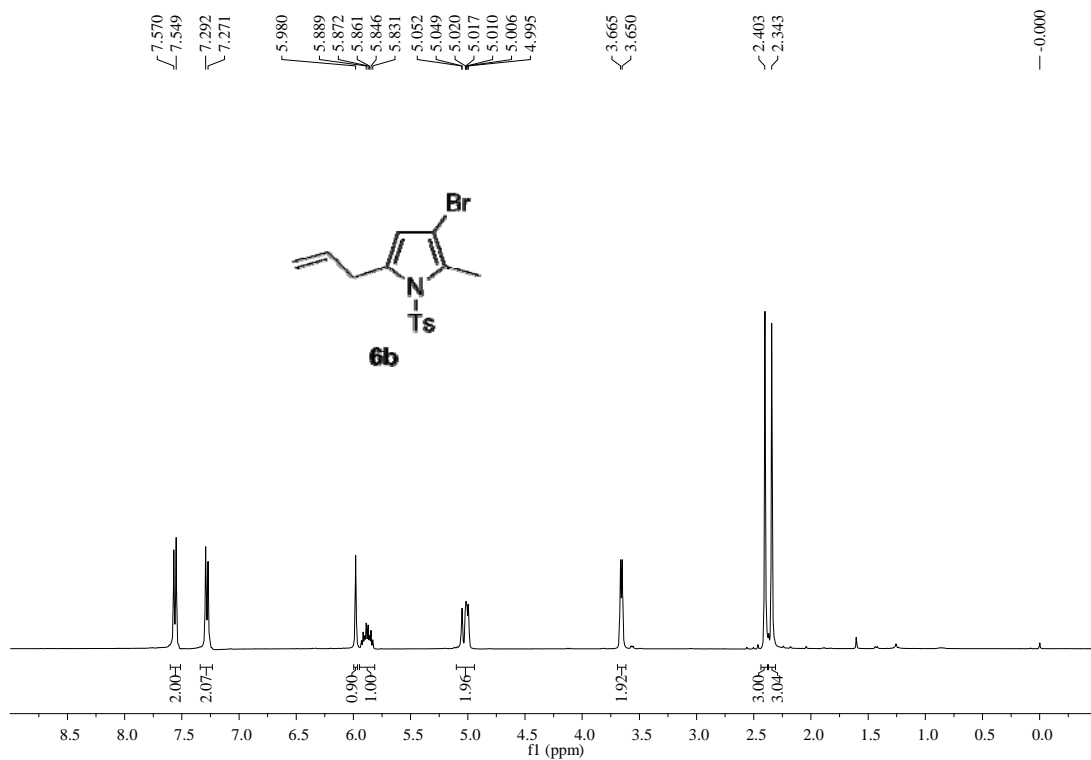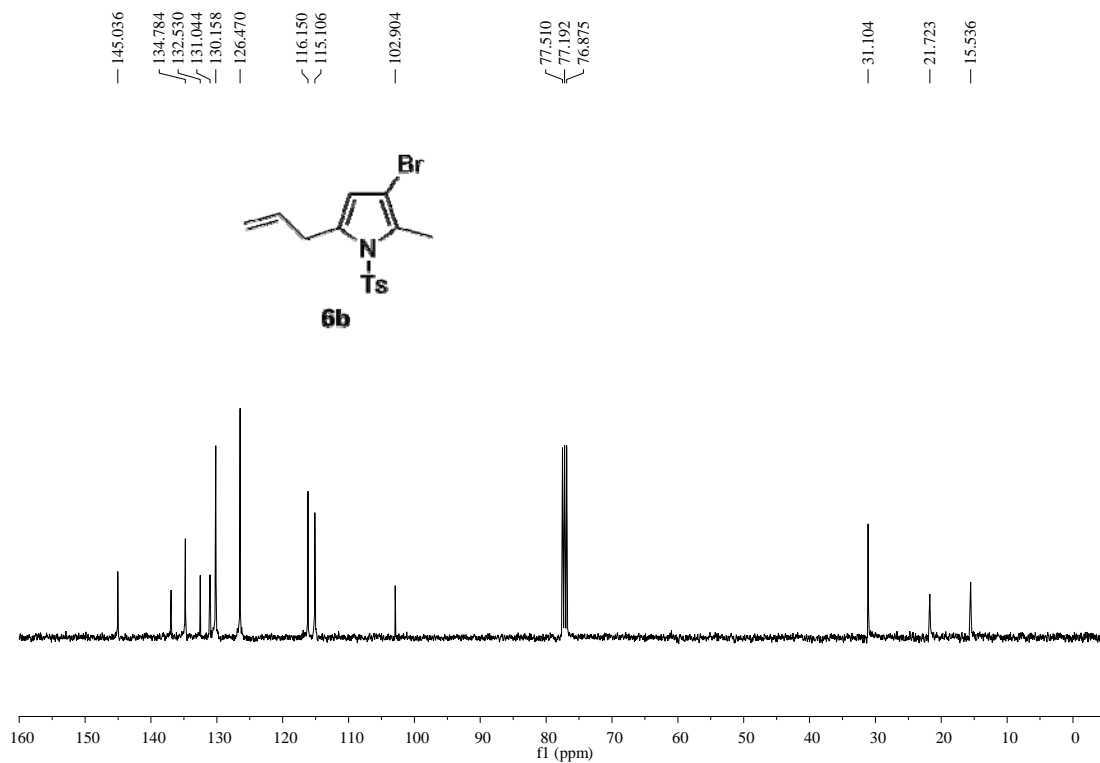

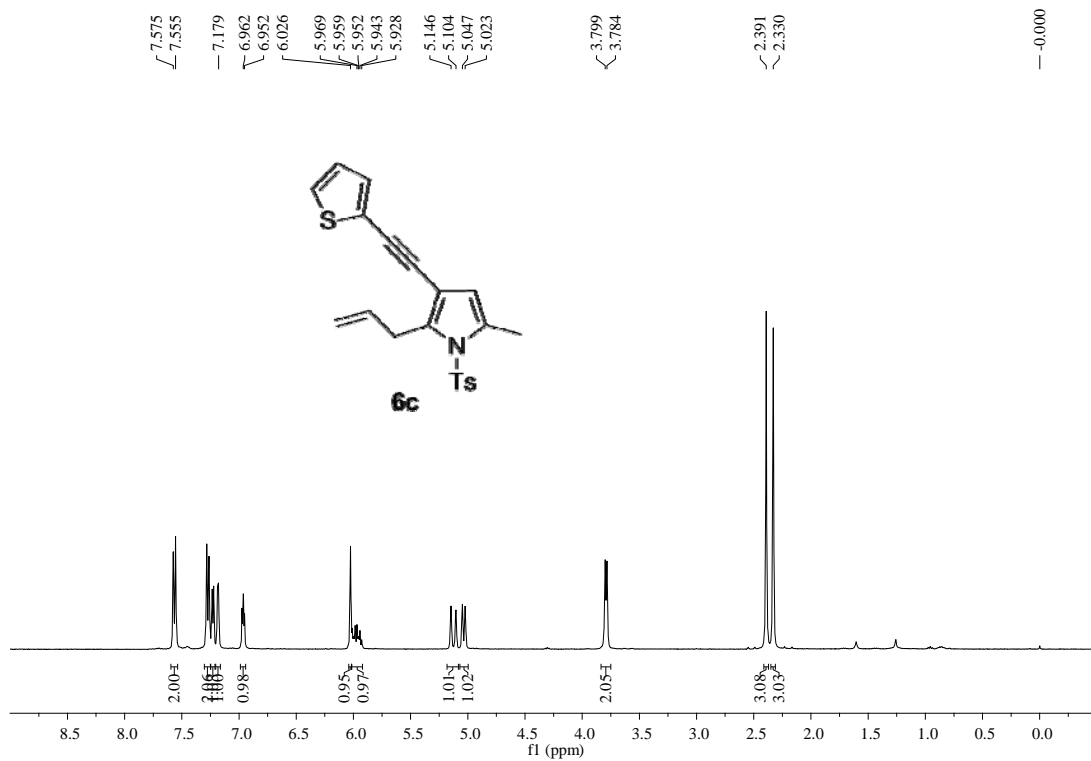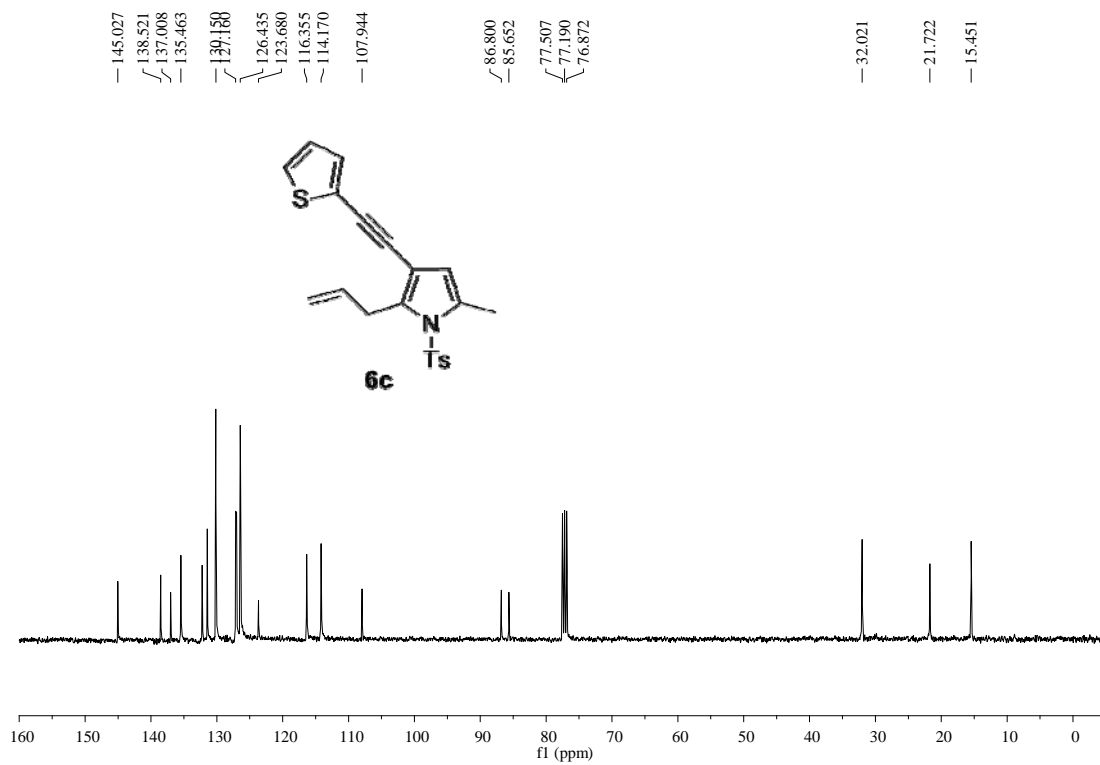

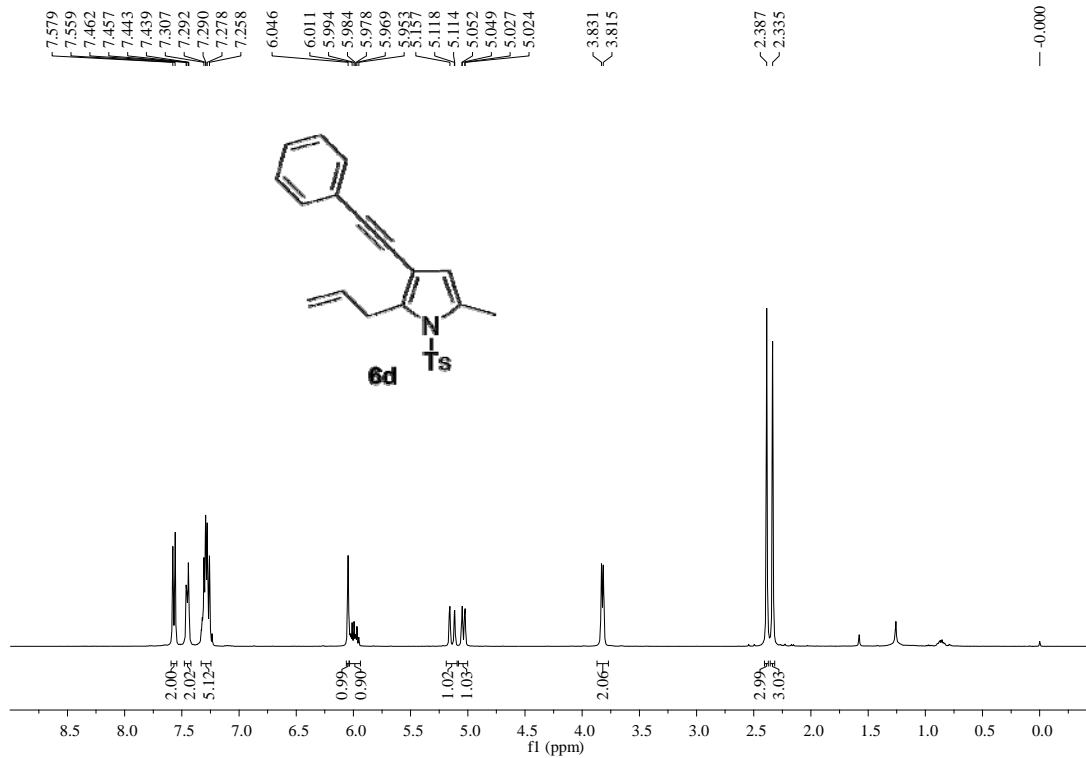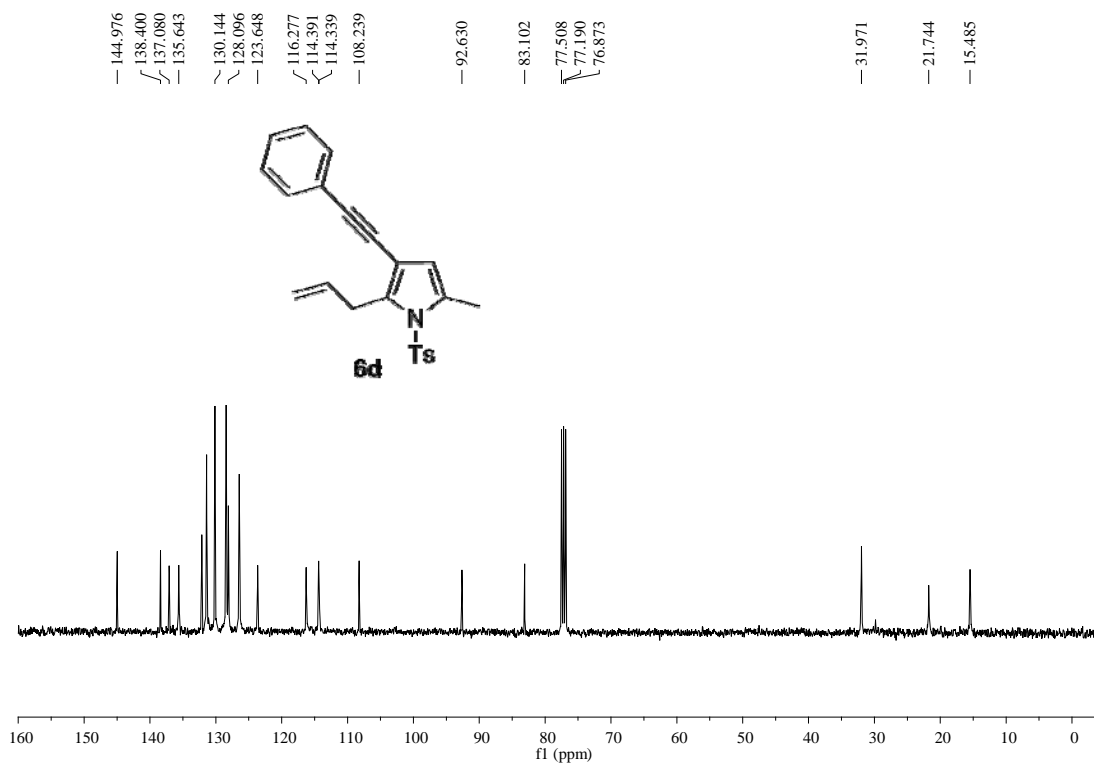



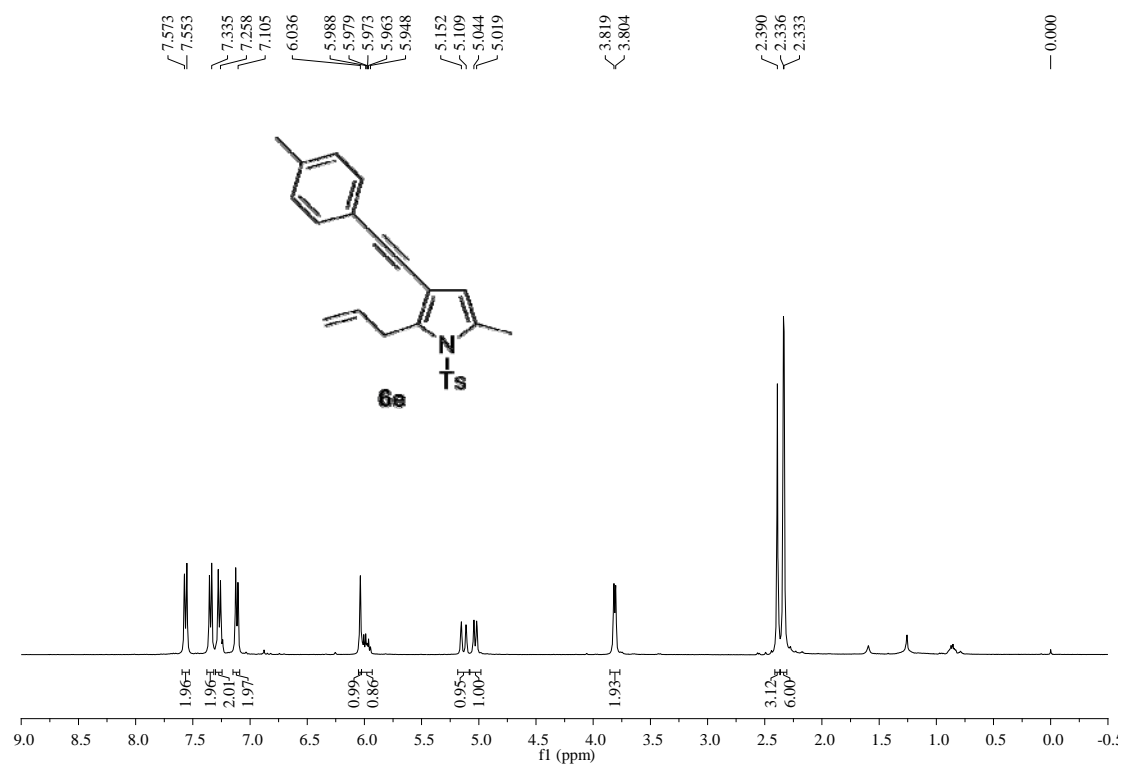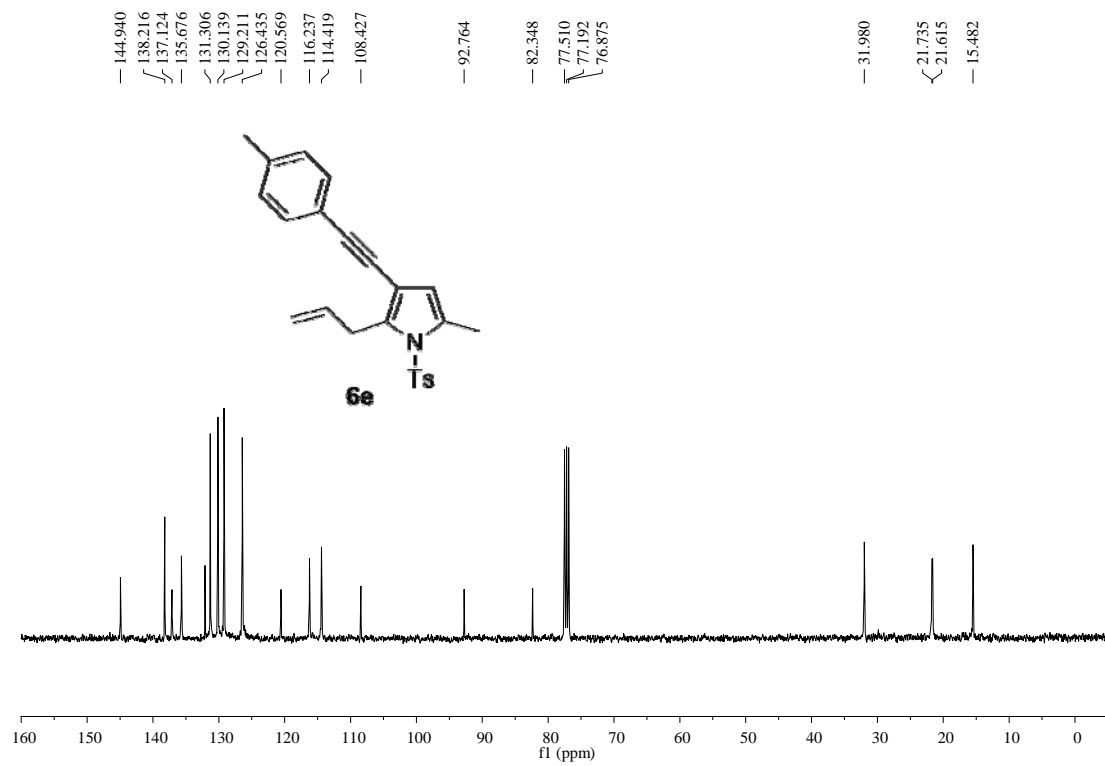

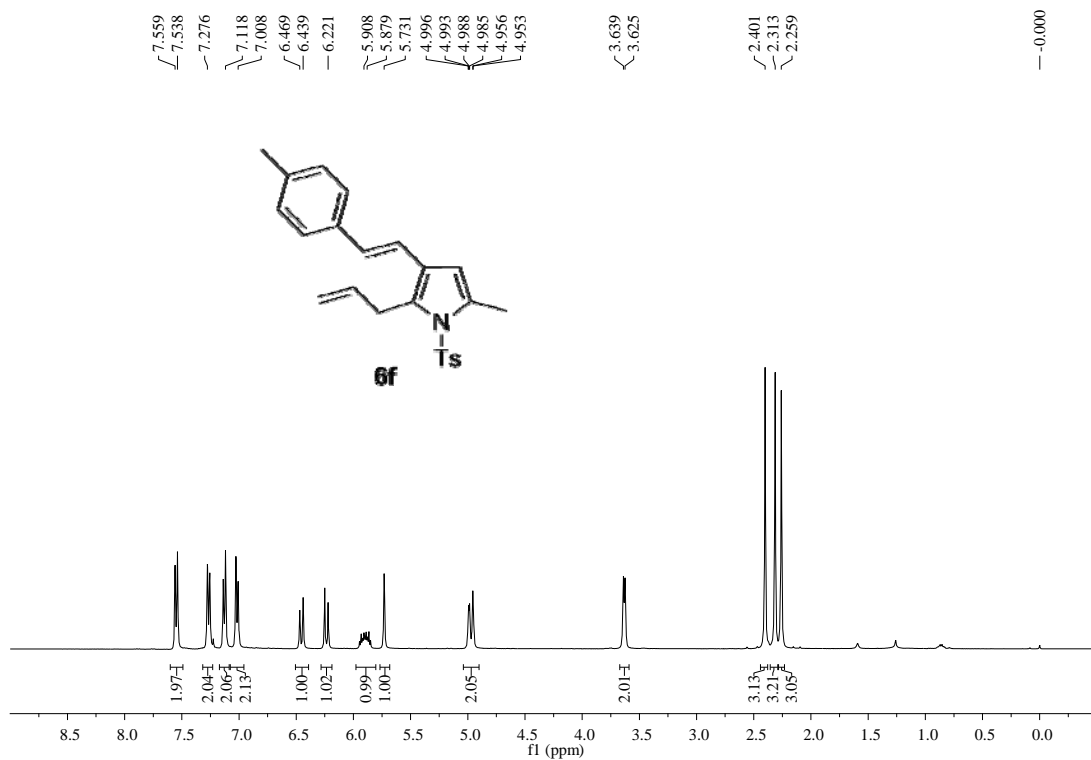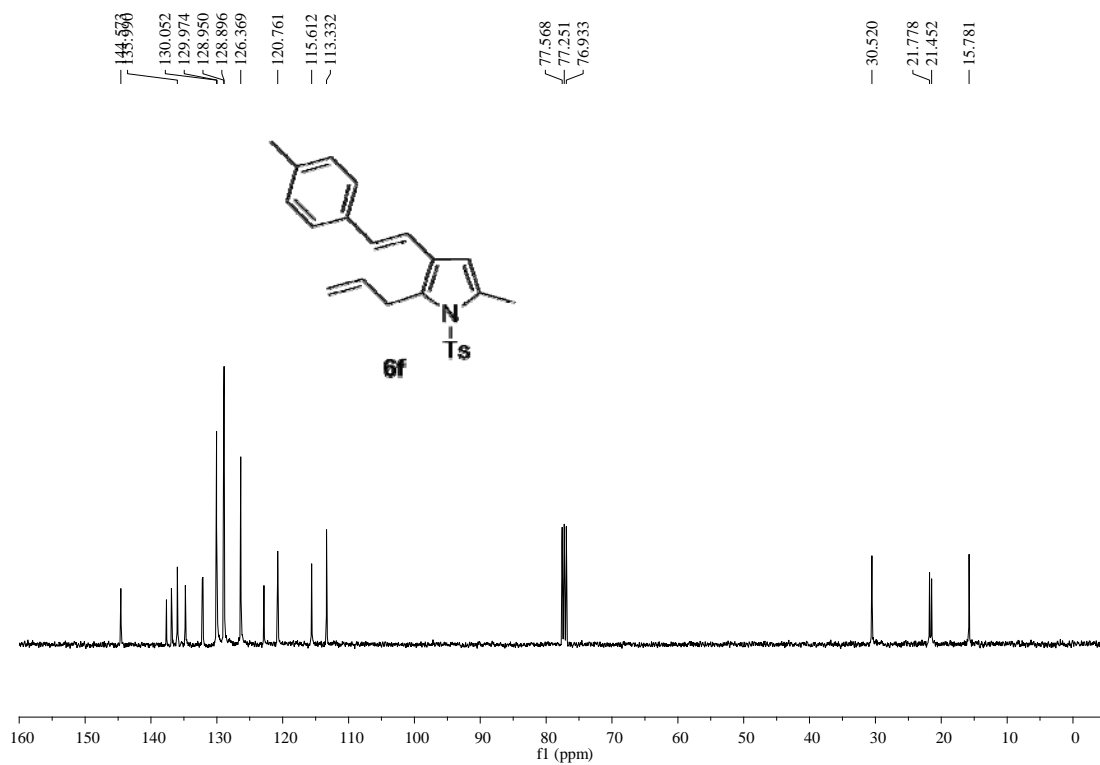

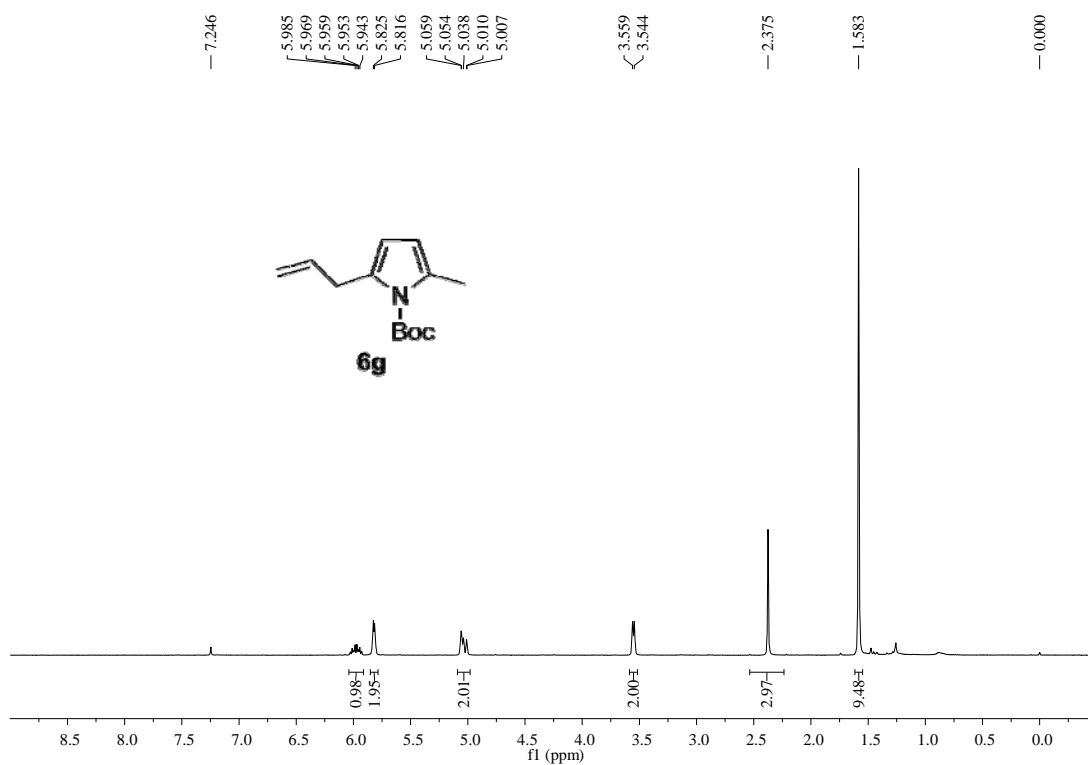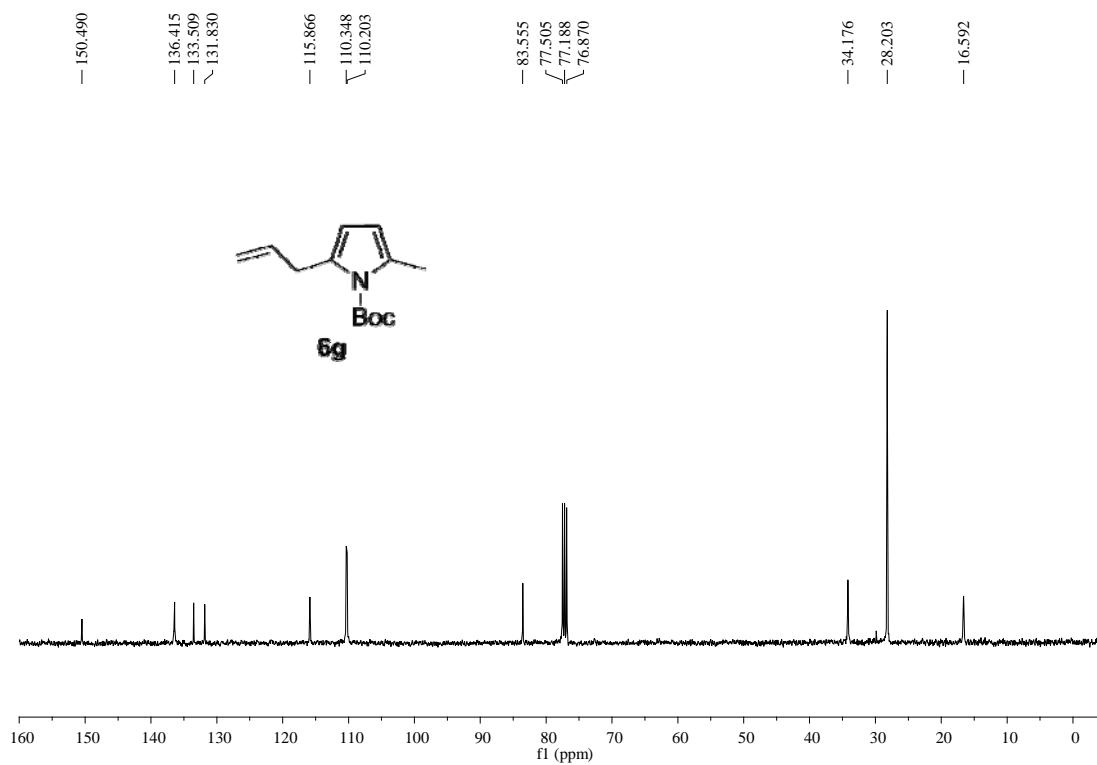

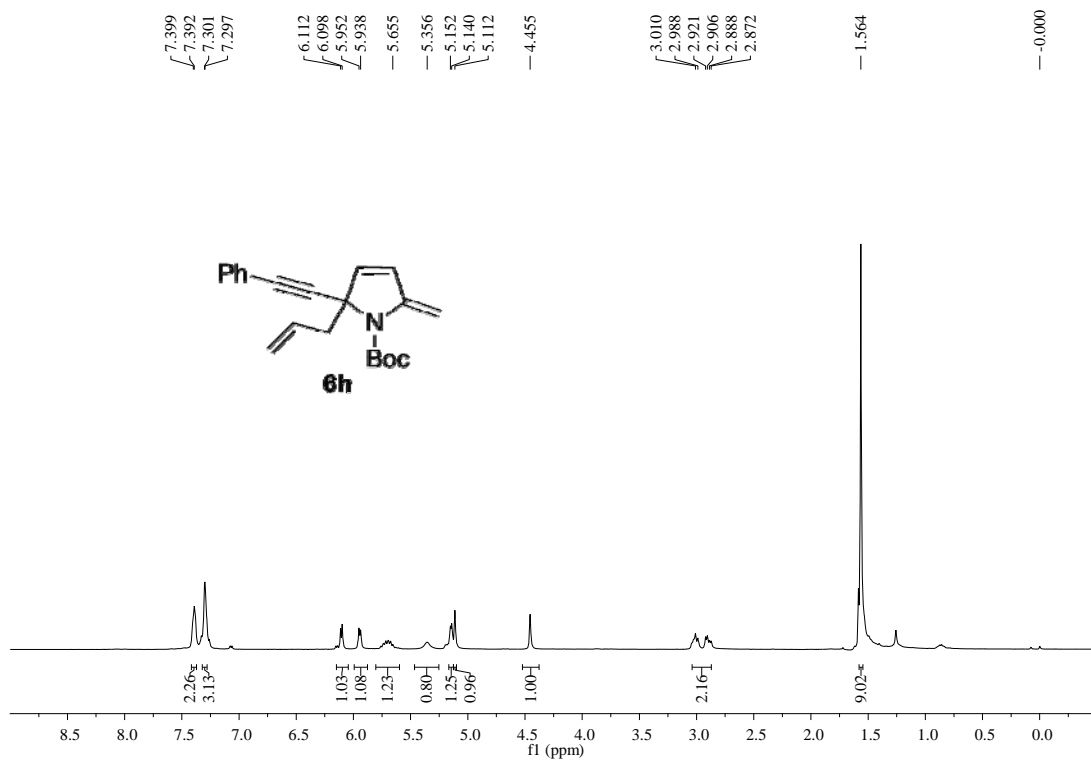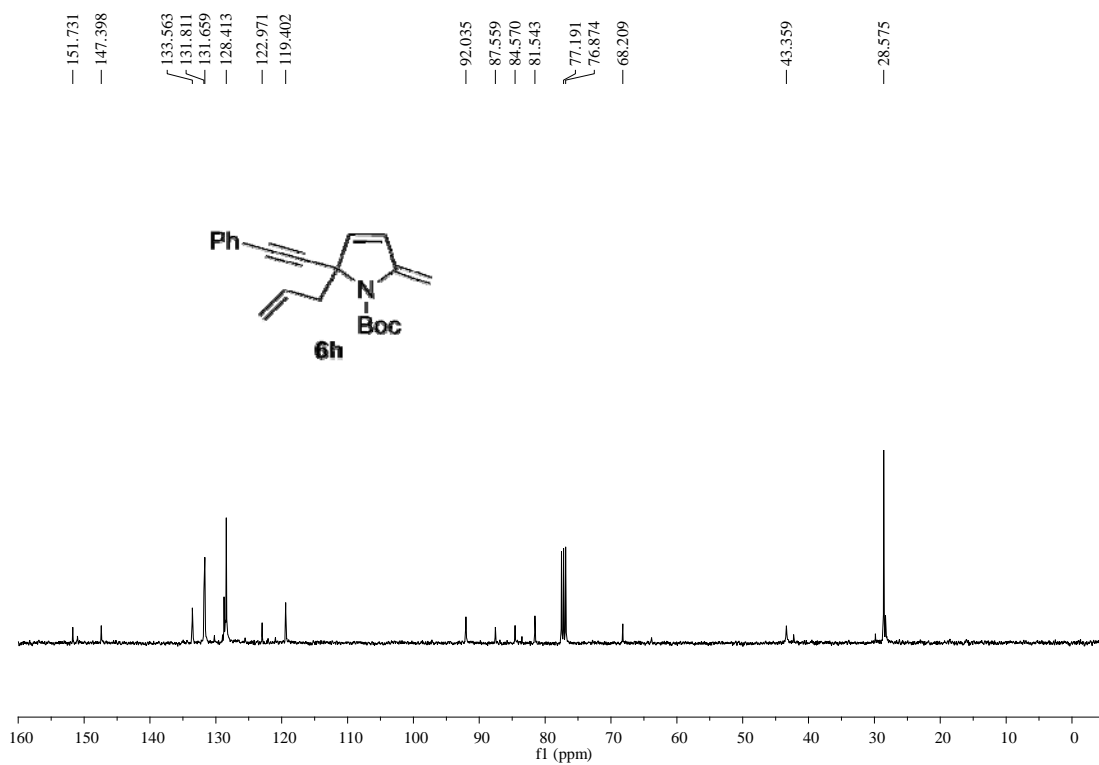

Supplement: c4cc10373d1.pdf [file c4cc10373d1.pdf]
